# Supplementary material for: NIS-mediated regioselective amidation of indole with quinazolinone and pyrimidone
Source: Royal Society of Chemistry journal article supplement (doi:10.1039/c4ra02417f), 2014-01-01

# **NIS Mediated Regioselective Amidation of Indole with Quinazolinone and Pyrimidone**

**Suman Kr Ghosh and Rajagopal Nagarajan\***

**School of Chemistry, University of Hyderabad, Hyderabad-500 046, INDIA**

**E-mail: rpsc@uohyd.ernet.in**

## **Supporting Information**

### **Table of contentspage number**

**X-Ray Data2-3**

**<sup>1</sup>H, <sup>13</sup>C, NMR spectra and HRMS data 4-89**

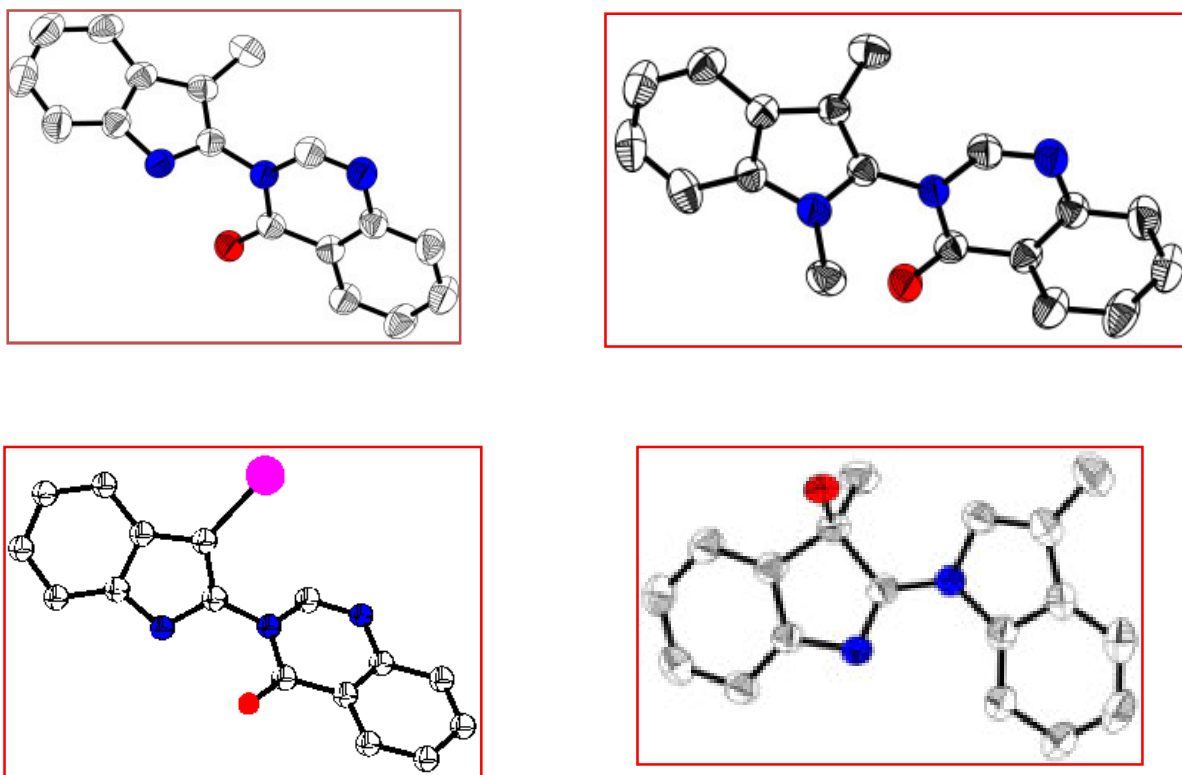

**Figure 1 : ORTEP of Compound 3a, 3i, 5aa, 9 (Hydrogens are removed for clarity)**

Molecular formula:  $C_{17}H_{13}N_3O_1$ , unit cell parameters:  $a=10.830(3)$ ,  $b=12.205(3)$ ,  $c=12.209(3)\text{\AA}$ ,  $\alpha=102.677(4)^\circ$ ,  $\beta=106.686(4)^\circ$ ,  $\gamma=110.923(4)^\circ$  and space group  $P -1$ . CCDC 956412 contains the supplementary crystallographic data for compound **3a** of this paper.

Molecular formula:  $C_{18}H_{15}N_3O_1$ , unit cell parameters:  $a=8.3989(18)$ ,  $b=12.9656(14)$ ,  $c=13.6993(18)\text{\AA}$ ,  $\beta=101.702(16)^\circ$  and space group  $P 21/n$ . CCDC 956410 contains the supplementary crystallographic data for compound **3i** of this paper.

Molecular formula:  $C_{16}H_{10}I_1N_3O_1$ , unit cell parameters:  $a=13.0741(18)$ ,  $b=4.2988(4)$ ,  $c=24.974(3)\text{\AA}$ ,  $\beta=100.040(11)^\circ$  and space group  $P 21/n$ . CCDC 956409 contains the supplementary crystallographic data for compound **5aa** of this paper.

Molecular formula:  $C_{18}H_{16}N_2O_1$ , unit cell parameters:  $a=10.8278(7)$ ,  $b=11.3669(8)$ ,  $c=13.0687(6)\text{\AA}$ ,  $\alpha=100.716(5)^\circ$ ,  $\beta=106.227(5)^\circ$ ,  $\gamma=104.477(6)^\circ$  and space group P -1. CCDC 956411 contains the supplementary crystallographic data for compound **9** of this paper.

These data can be obtained free of charge from The Cambridge Crystallographic Data Centre via [www.ccdc.cam.ac.uk/data\\_request/cif](http://www.ccdc.cam.ac.uk/data_request/cif).

# <sup>1</sup>H, <sup>13</sup>C NMR, HRMS Spectral Data of Compounds

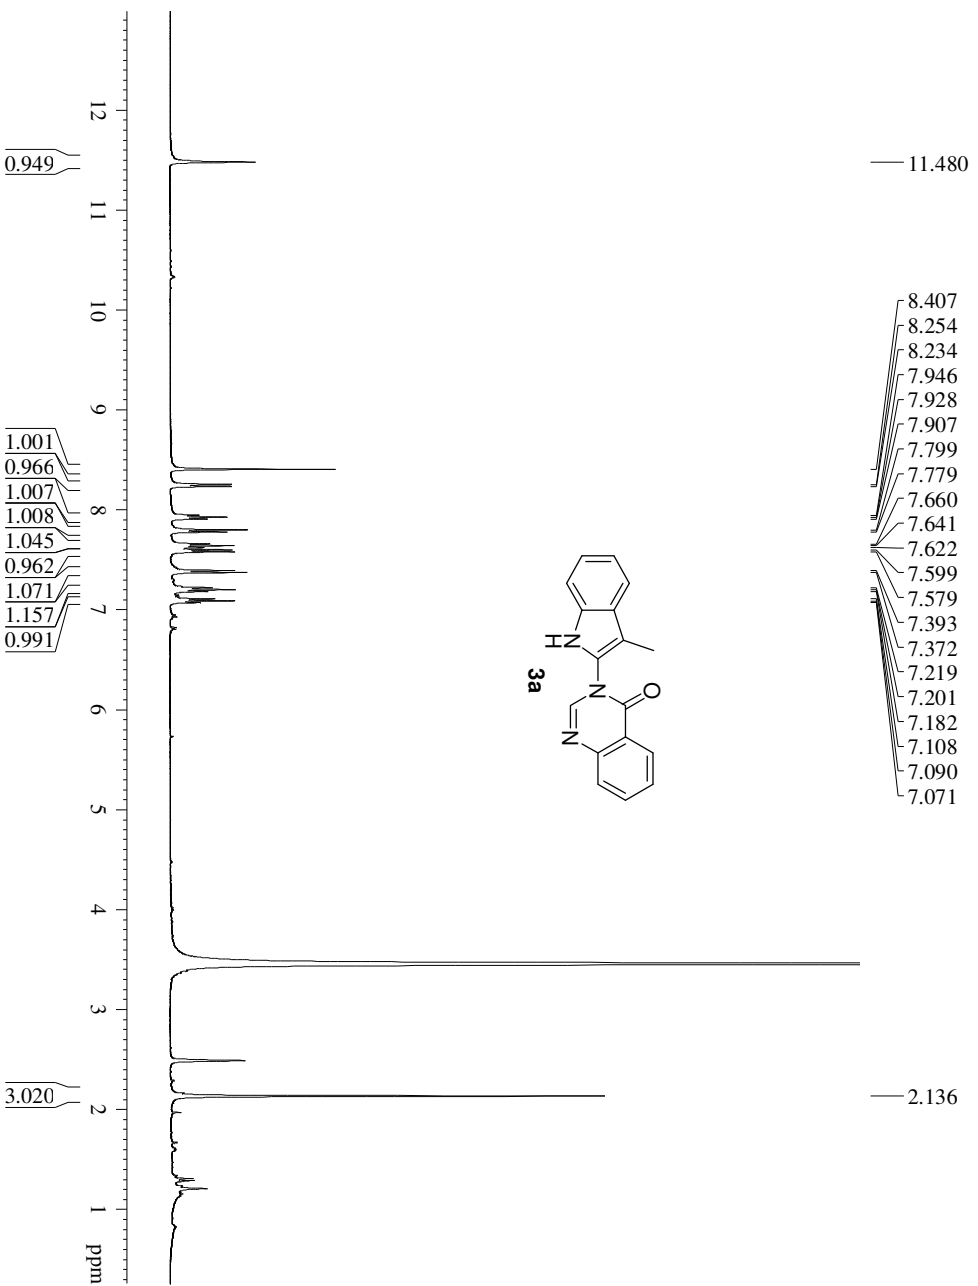

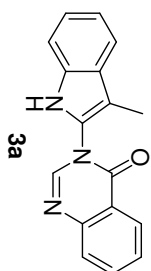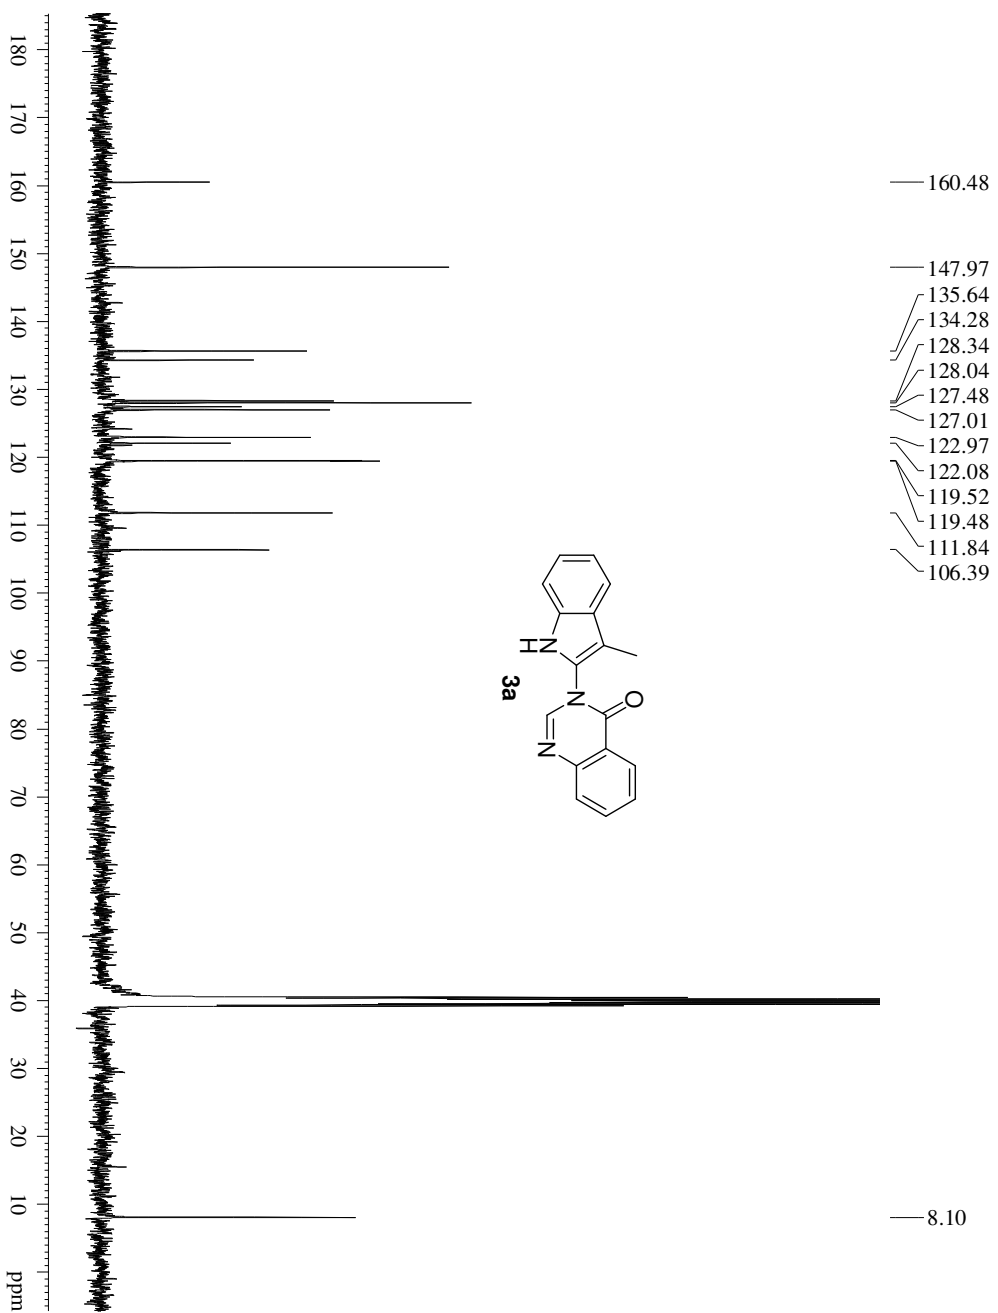

# BRUKER MAXIS HRMS REPORT

School of Chemistry  
University of Hyderabad

## Analysis Info

Analysis Name D:\Data\2013\Dr.NAGARAJAN\JULY\SKG-54.d  
Method tune\_low\_PosR.m  
Sample Name SKG-54--DCM-MEOH  
Comment

Acquisition Date 7/26/2013 2:10:38 PM

Operator Ramu Sridhar  
Instrument maXis 10138

## Acquisition Parameter

|             |            |                       |           |                  |           |
|-------------|------------|-----------------------|-----------|------------------|-----------|
| Source Type | ESI        | Ion Polarity          | Positive  | Set Nebulizer    | 4.4 psi   |
| Focus       | Not active | Set Capillary         | 3800 V    | Set Dry Heater   | 250 °C    |
| Scan Begin  | 100 m/z    | Set End Plate Offset  | -500 V    | Set Dry Gas      | 5.0 l/min |
| Scan End    | 2500 m/z   | Set Collision Cell RF | 350.0 Vpp | Set Divert Valve | Waste     |

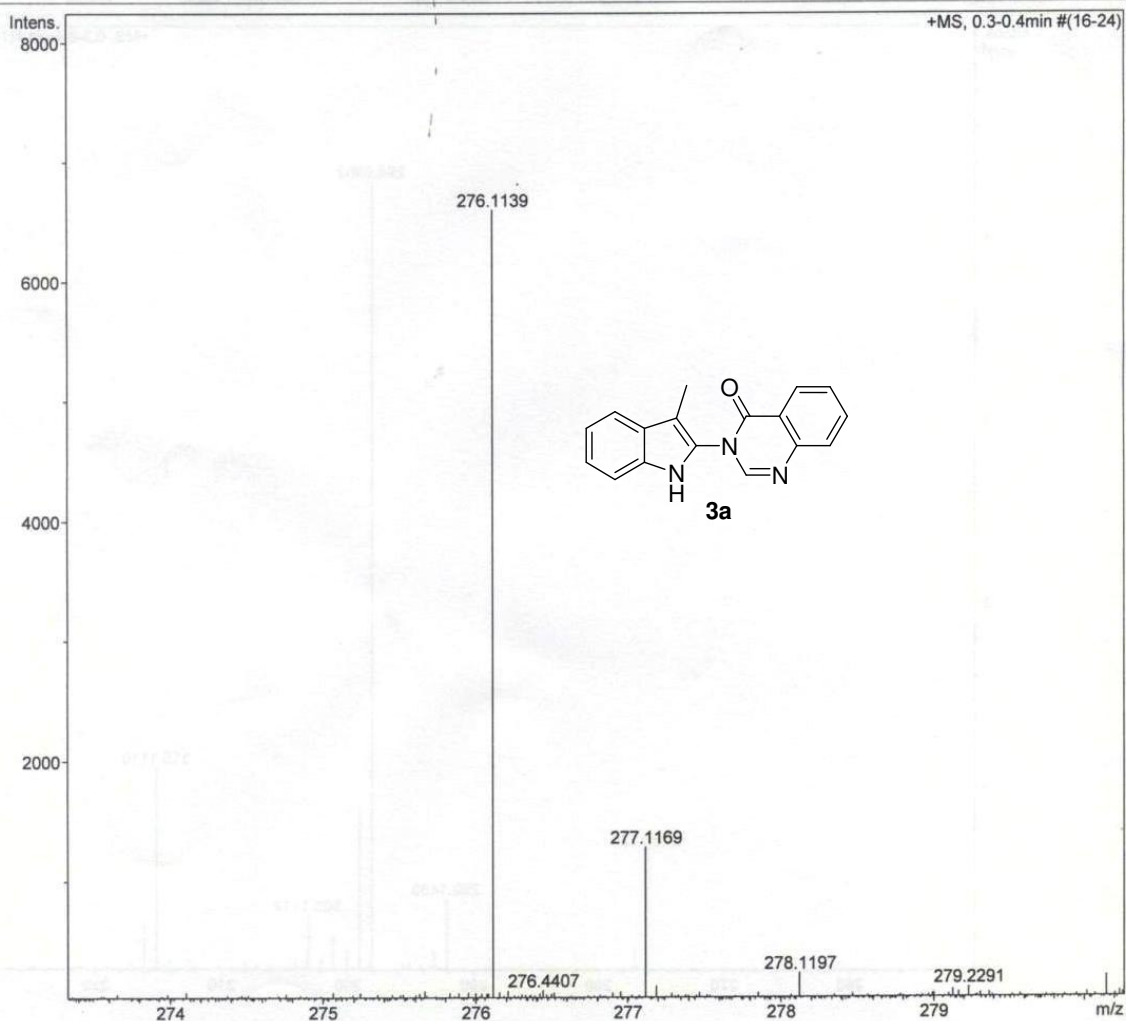

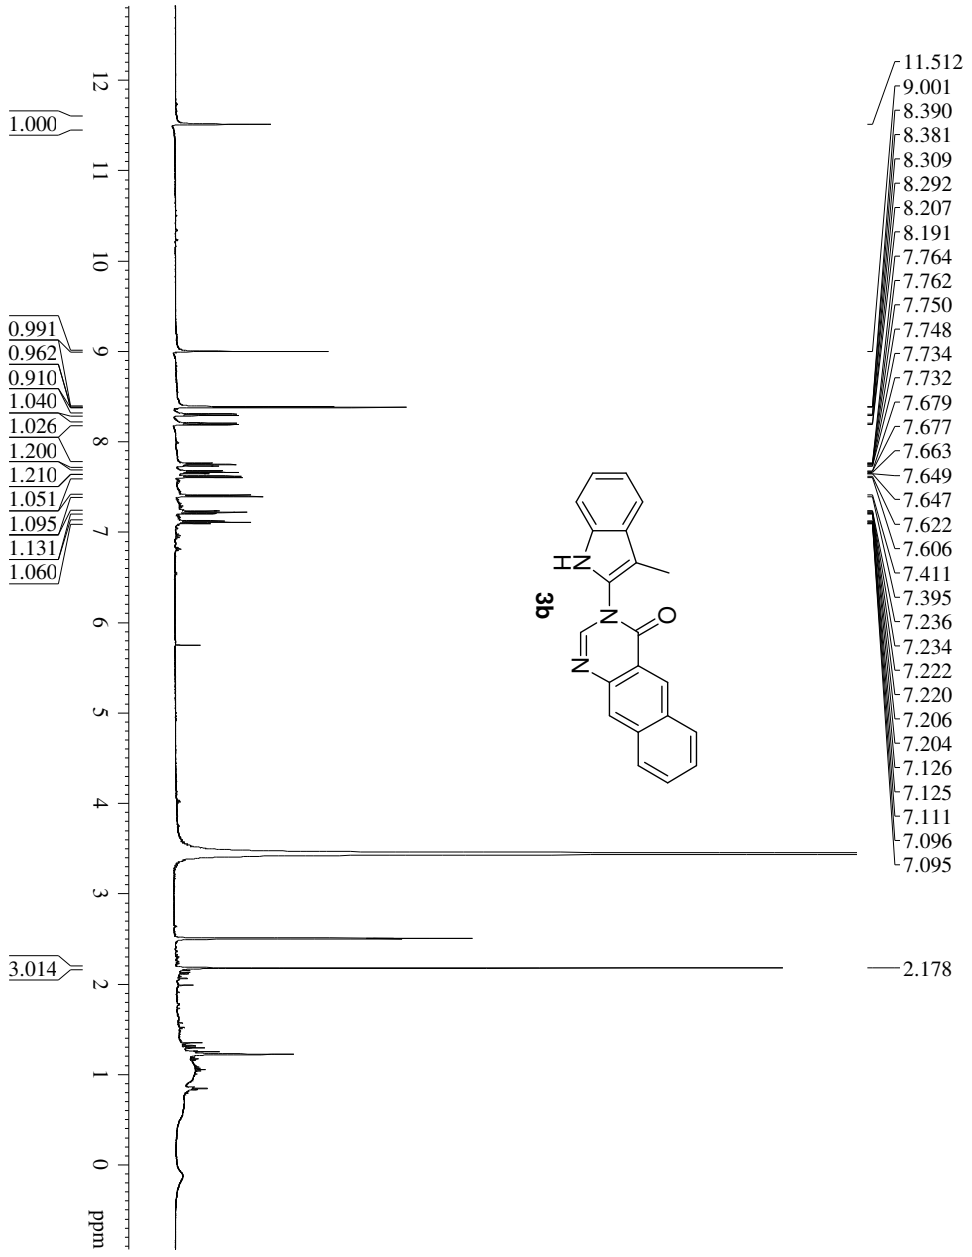

160.94  
146.97  
143.26  
136.73  
134.30  
131.89  
129.90  
129.52  
128.80  
128.46  
128.22  
127.55  
127.37  
125.83  
122.92  
120.87  
119.50  
119.45  
111.85  
106.44

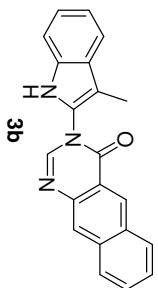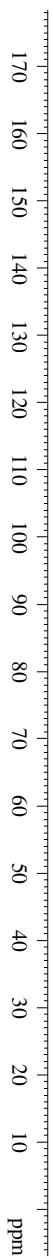

—8.17



# BRUKER MAXIS HRMS REPORT

School of Chemistry  
University of Hyderabad

## Analysis Info

Analysis Name D:\Data\2013\Dr.NAGARAJAN\JUNE\SKG-108.d  
Method tune\_low\_Pos.m  
Sample Name SKG-108-DCM-MEOH  
Comment

Acquisition Date 6/4/2013 11:57:28 AM  
Operator Ramu Sridhar  
Instrument maXis 10138

## Acquisition Parameter

|             |            |                       |           |                  |           |
|-------------|------------|-----------------------|-----------|------------------|-----------|
| Source Type | ESI        | Ion Polarity          | Positive  | Set Nebulizer    | 4.4 psi   |
| Focus       | Not active | Set Capillary         | 3800 V    | Set Dry Heater   | 180 °C    |
| Scan Begin  | 50 m/z     | Set End Plate Offset  | -500 V    | Set Dry Gas      | 4.0 l/min |
| Scan End    | 1500 m/z   | Set Collision Cell RF | 350.0 Vpp | Set Divert Valve | Waste     |

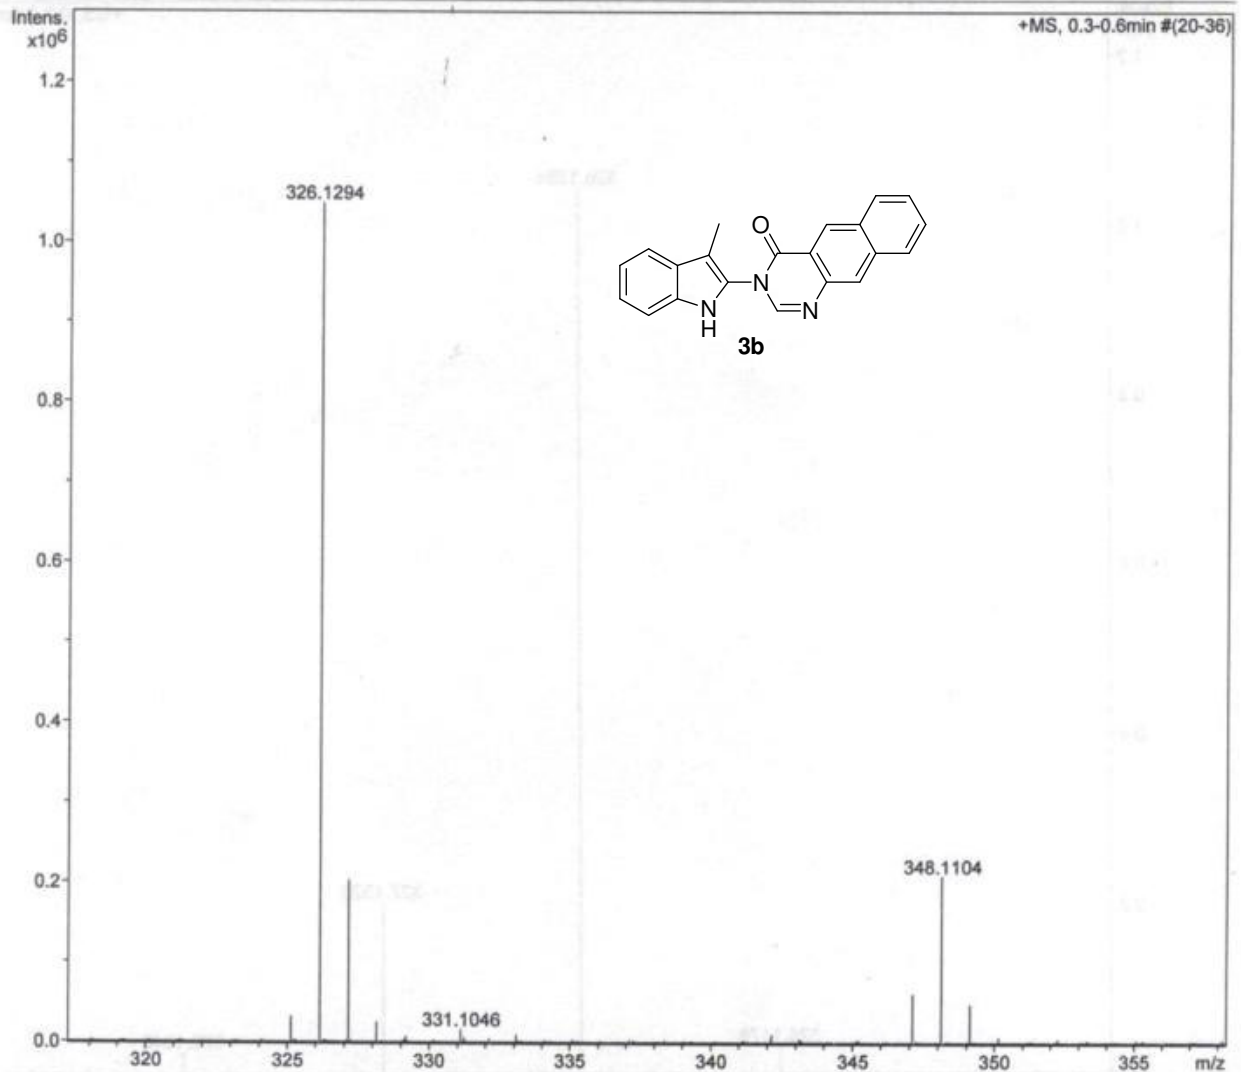

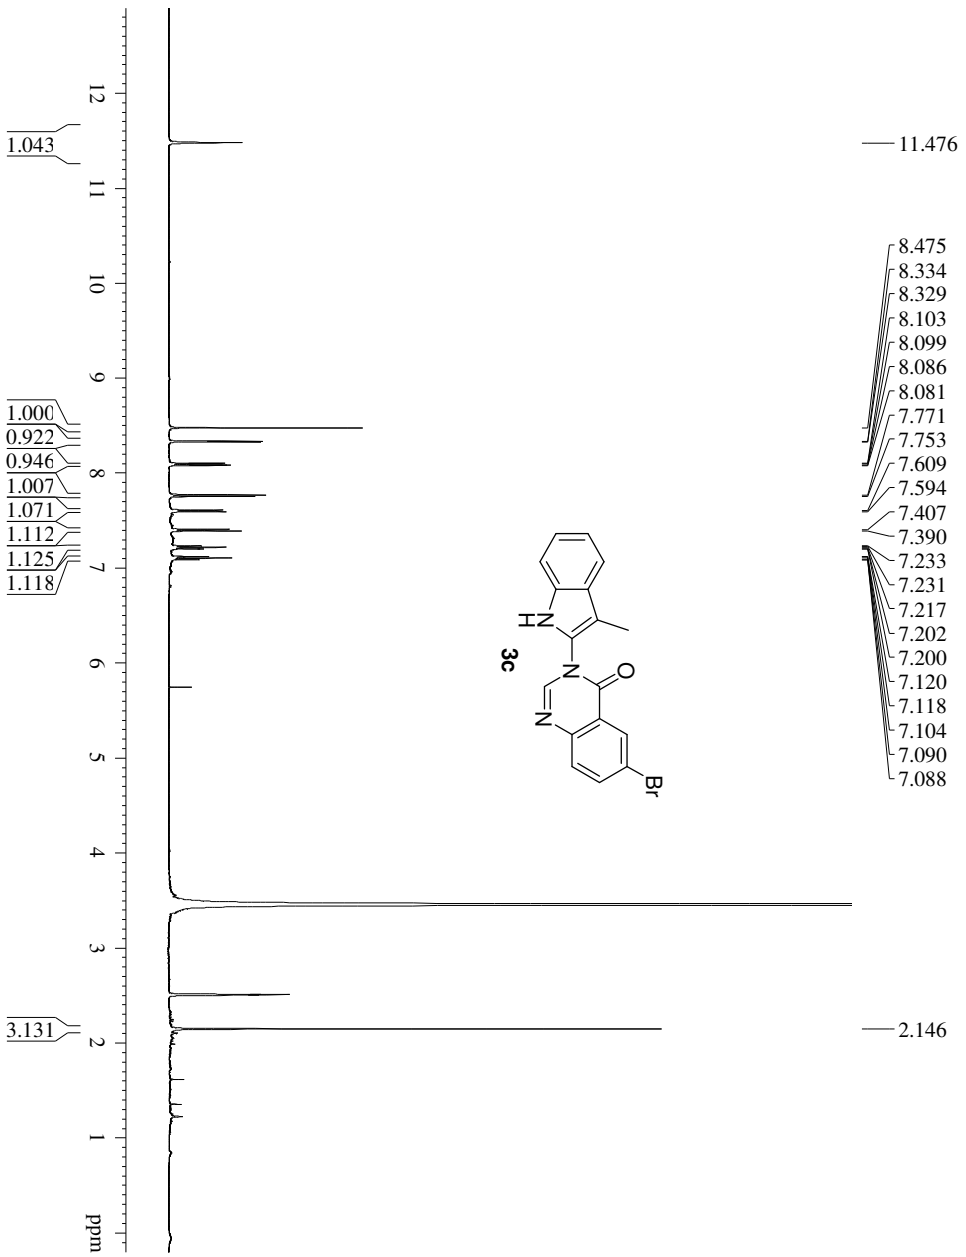

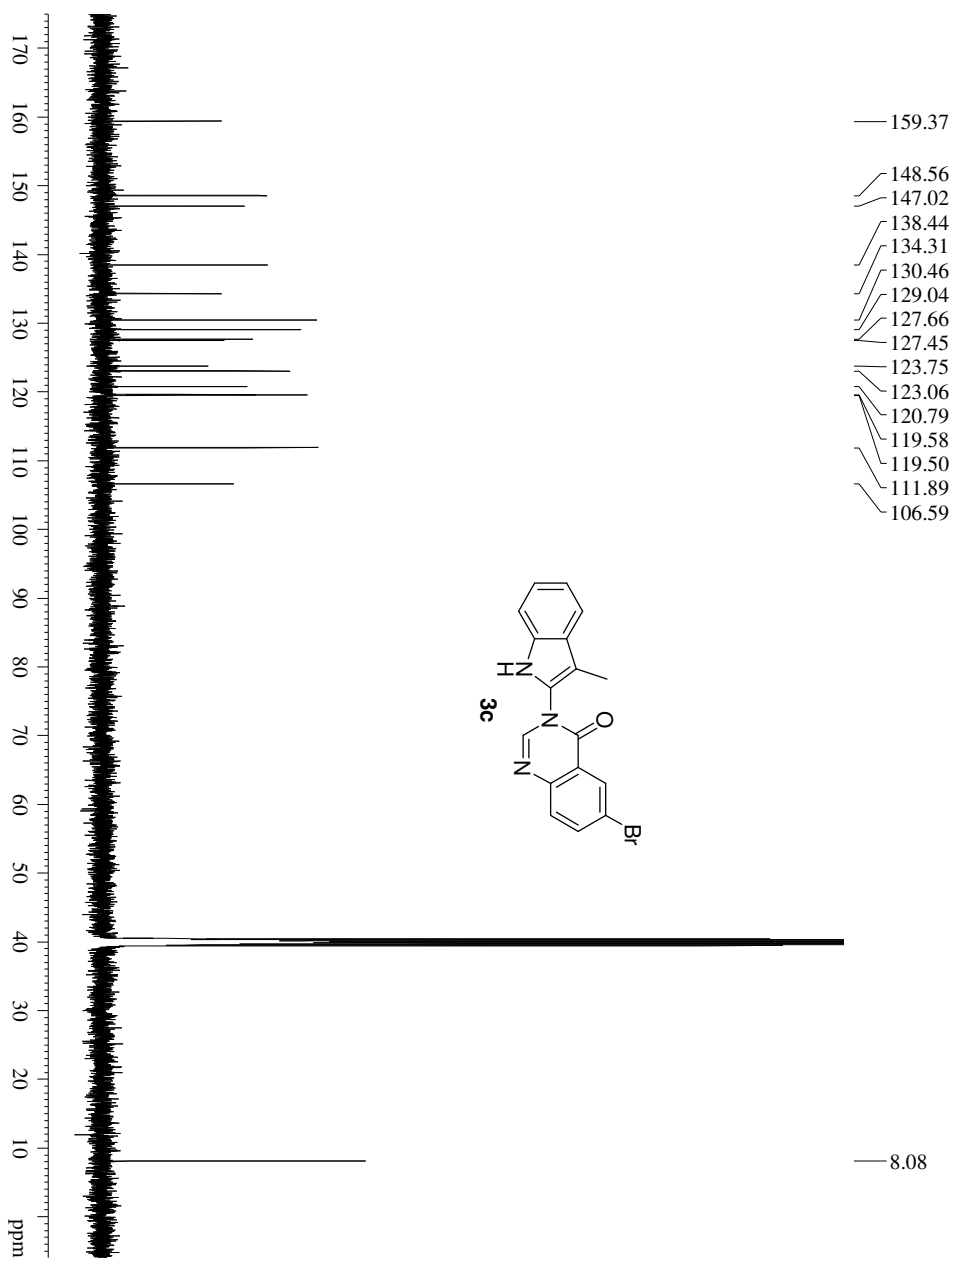

# BRUKER MAXIS HRMS REPORT

School of Chemistry  
University of Hyderabad

## Analysis Info

Analysis Name D:\Data\2013\Dr.NAGARAJAN\JUNE\SKG-102.d  
Method tune\_low\_Pos.m  
Sample Name SKG-102-DCM-MEOH  
Comment

Acquisition Date 6/4/2013 12:08:16 PM

Operator Ramu Sridhar  
Instrument maXis 10138

## Acquisition Parameter

|             |            |                       |           |                  |           |
|-------------|------------|-----------------------|-----------|------------------|-----------|
| Source Type | ESI        | Ion Polarity          | Positive  | Set Nebulizer    | 4.4 psi   |
| Focus       | Not active | Set Capillary         | 3800 V    | Set Dry Heater   | 180 °C    |
| Scan Begin  | 50 m/z     | Set End Plate Offset  | -500 V    | Set Dry Gas      | 4.0 l/min |
| Scan End    | 1500 m/z   | Set Collision Cell RF | 350.0 Vpp | Set Divert Valve | Waste     |

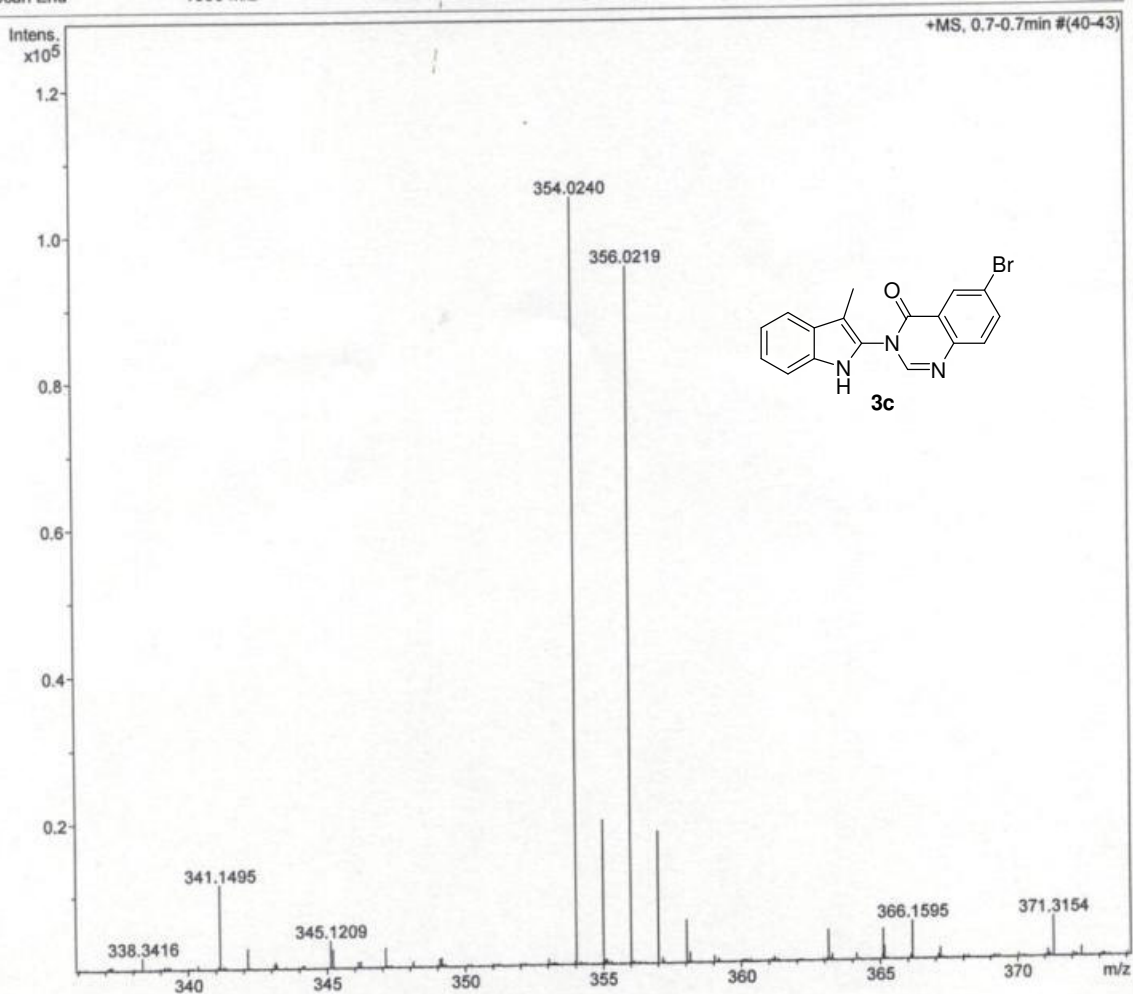

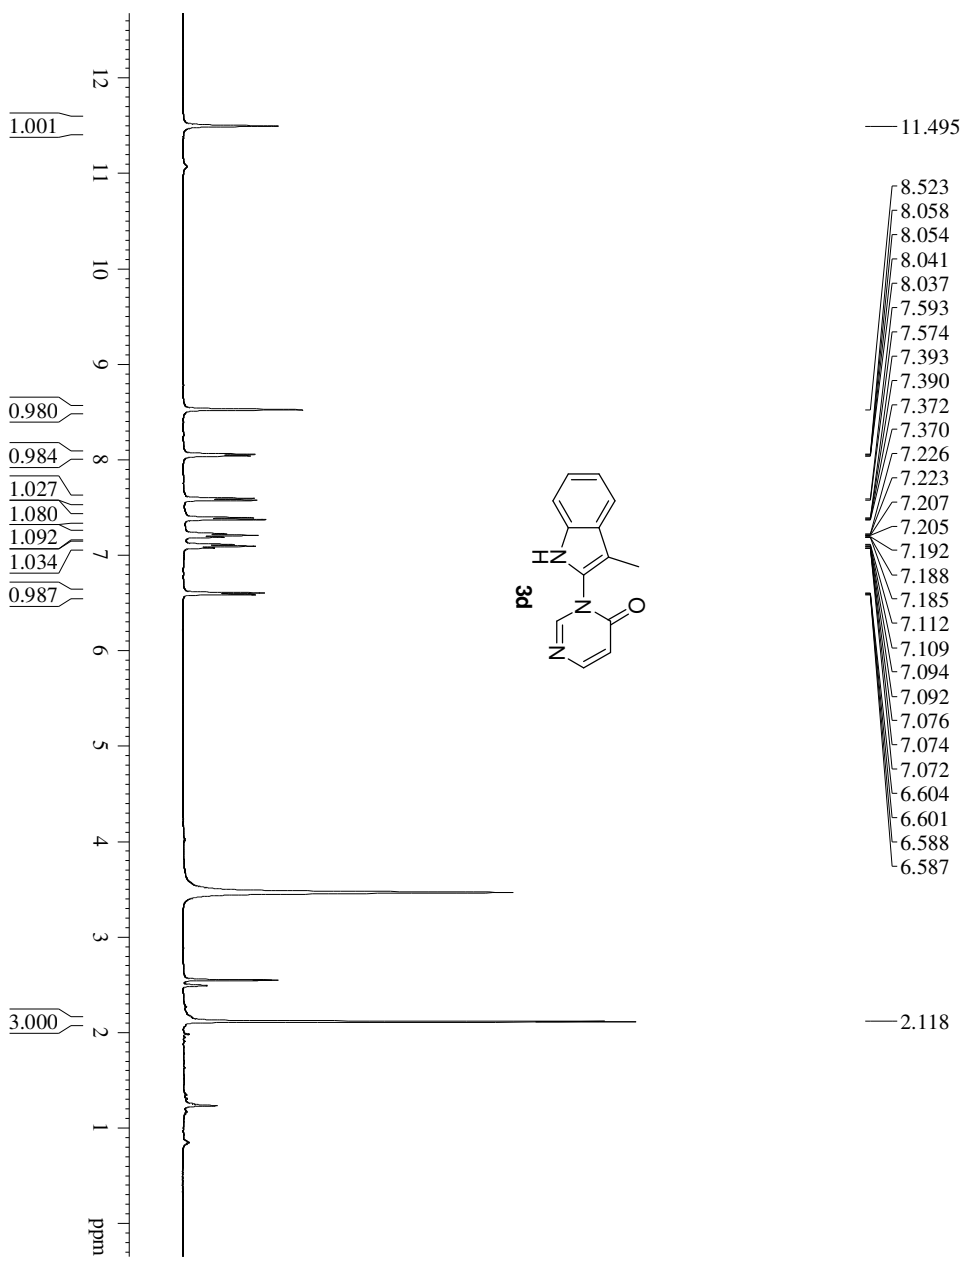

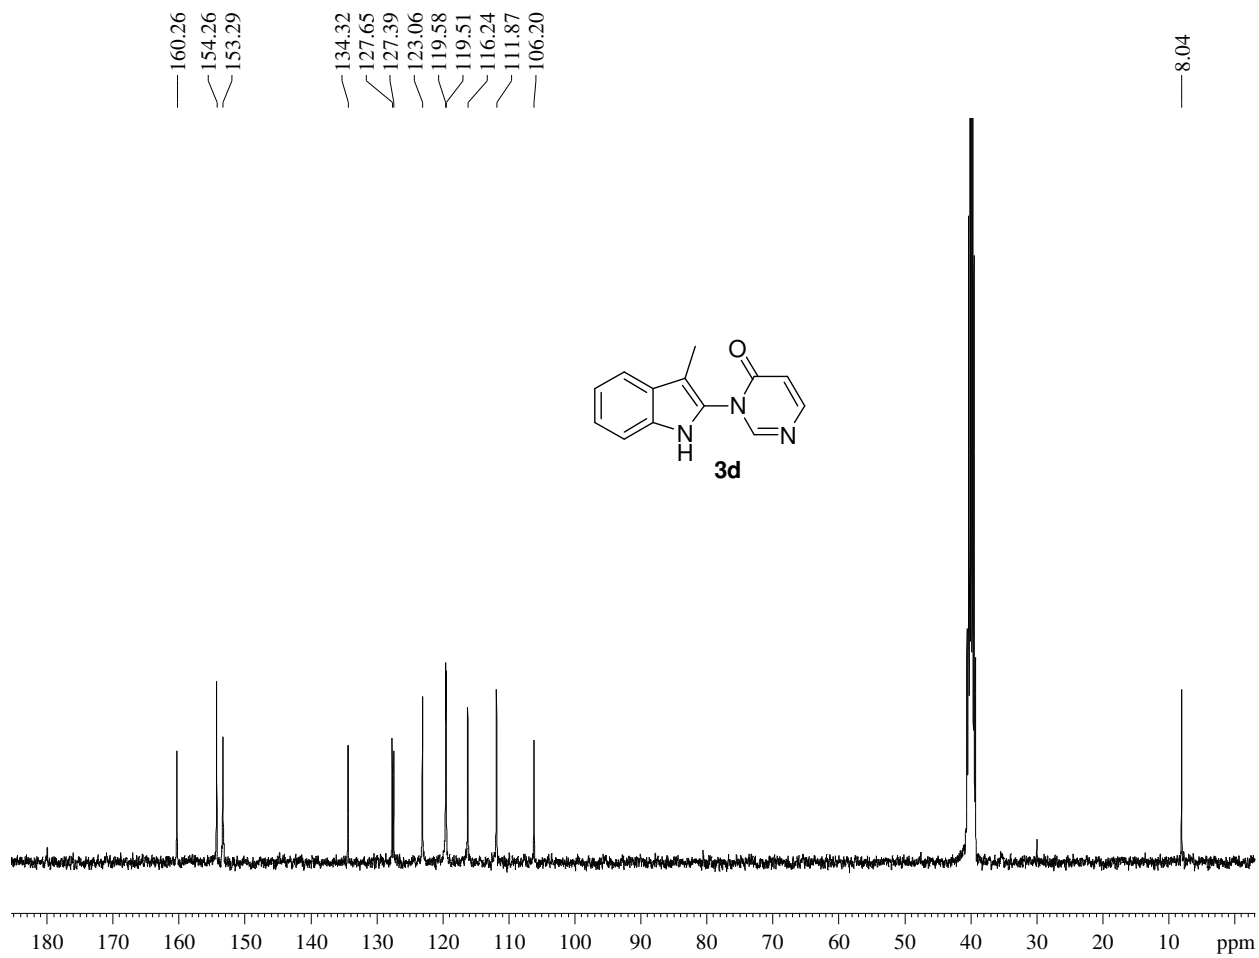

# BRUKER MAXIS HRMS REPORT

School of Chemistry  
University of Hyderabad

## Analysis Info

Analysis Name D:\Data\2013\Dr.NAGARAJANMAY\SKG-180.d  
Method tune\_low.m  
Sample Name SKG-180-DCM-MEOH  
Comment

Acquisition Date 5/23/2013 12:32:43 PM

Operator Ramu Sridhar  
Instrument maXis 10138

## Acquisition Parameter

|             |            |                       |           |                  |           |
|-------------|------------|-----------------------|-----------|------------------|-----------|
| Source Type | ESI        | Ion Polarity          | Positive  | Set Nebulizer    | 4.4 psi   |
| Focus       | Not active | Set Capillary         | 3500 V    | Set Dry Heater   | 200 °C    |
| Scan Begin  | 50 m/z     | Set End Plate Offset  | -500 V    | Set Dry Gas      | 4.0 l/min |
| Scan End    | 1800 m/z   | Set Collision Cell RF | 350.0 Vpp | Set Divert Valve | Waste     |

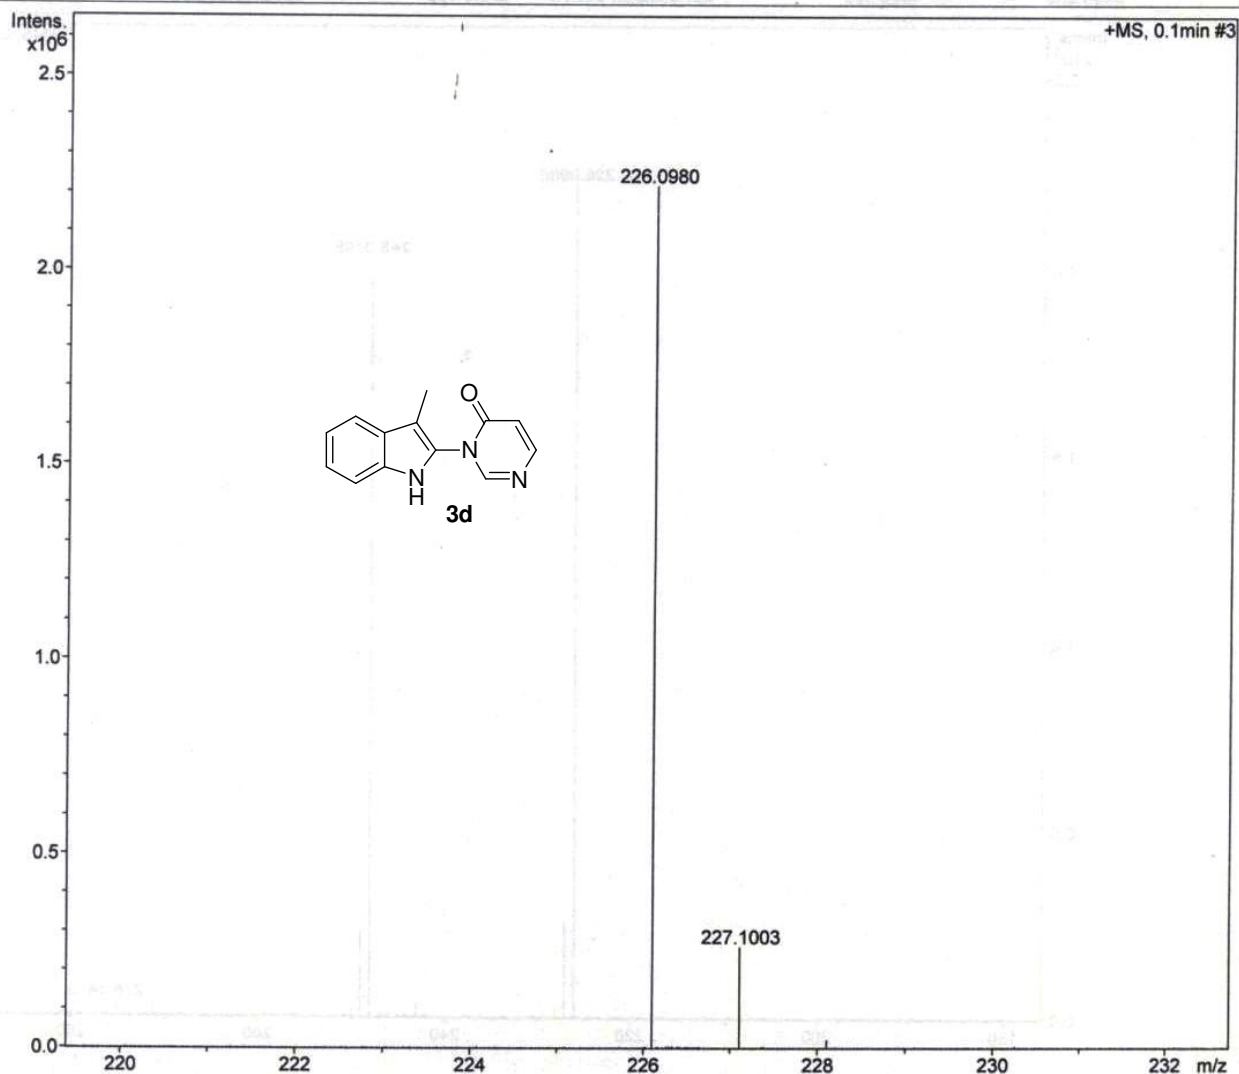

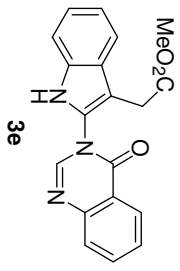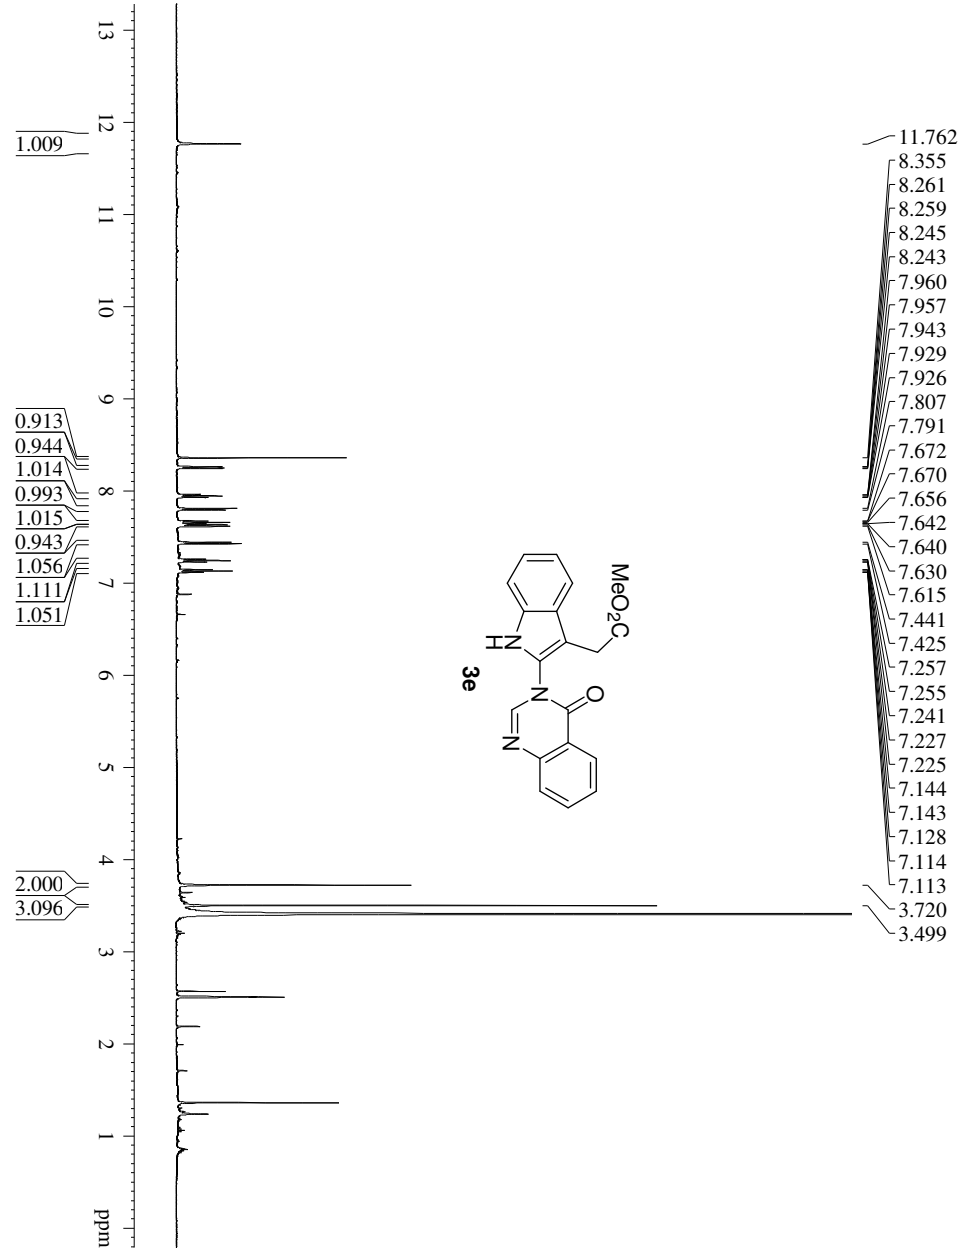



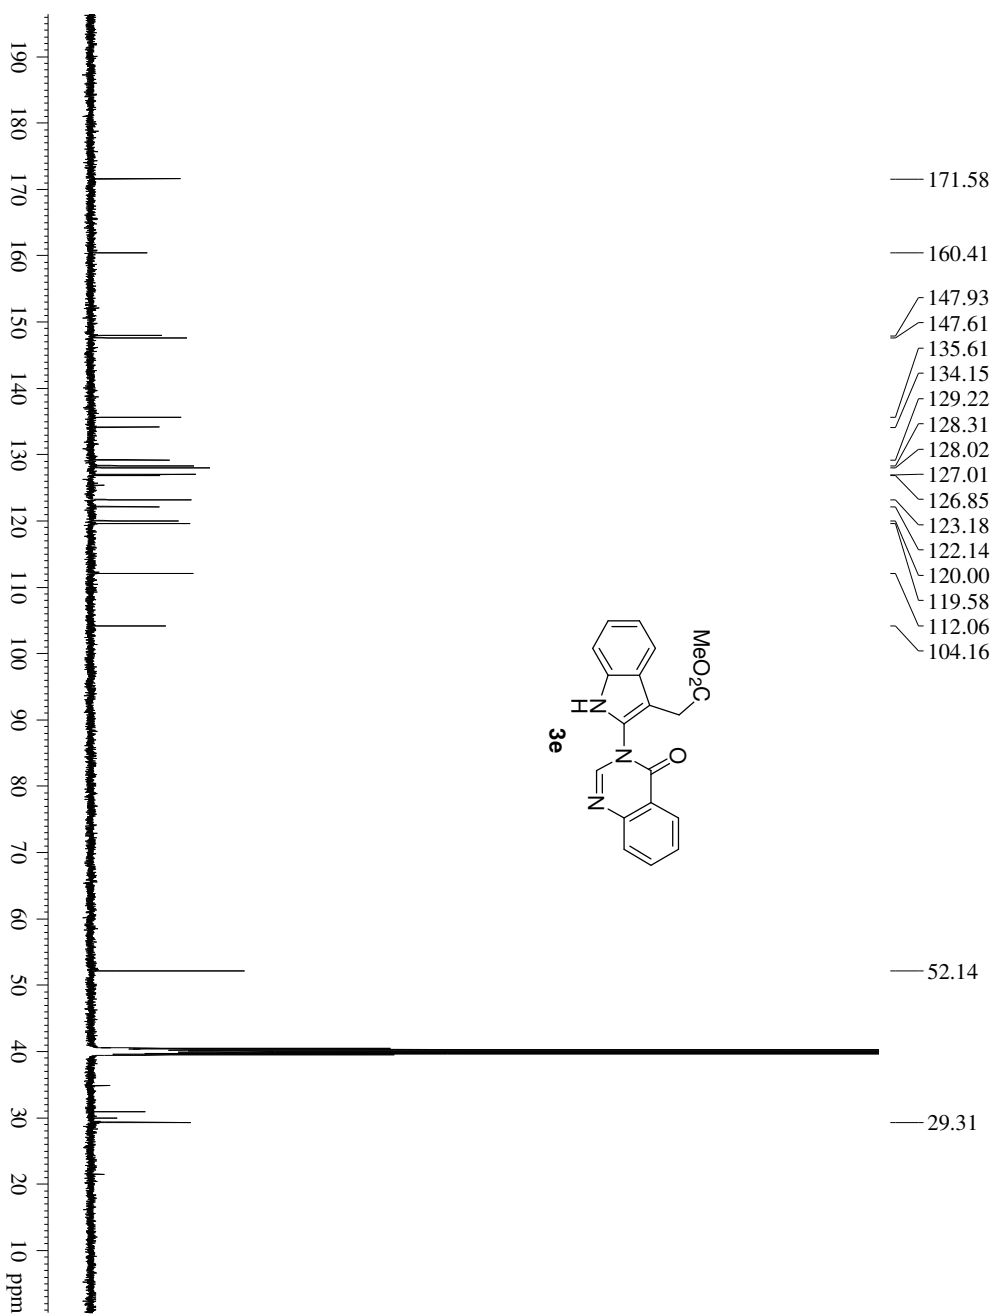

# BRUKER MAXIS HRMS REPORT

School of Chemistry  
University of Hyderabad

## Analysis Info

Analysis Name D:\Data\2013\Dr.NAGARAJANMAY\SKG-113.d  
Method tune\_low.m  
Sample Name SKG-113-DCM-MEOH  
Comment

Acquisition Date 5/23/2013 1:01:49 PM

Operator Ramu Sridhar  
Instrument maXis 10138

## Acquisition Parameter

|             |            |                       |           |                  |           |
|-------------|------------|-----------------------|-----------|------------------|-----------|
| Source Type | ESI        | Ion Polarity          | Positive  | Set Nebulizer    | 4.4 psi   |
| Focus       | Not active | Set Capillary         | 3500 V    | Set Dry Heater   | 200 °C    |
| Scan Begin  | 50 m/z     | Set End Plate Offset  | -500 V    | Set Dry Gas      | 4.0 l/min |
| Scan End    | 1800 m/z   | Set Collision Cell RF | 350.0 Vpp | Set Divert Valve | Waste     |

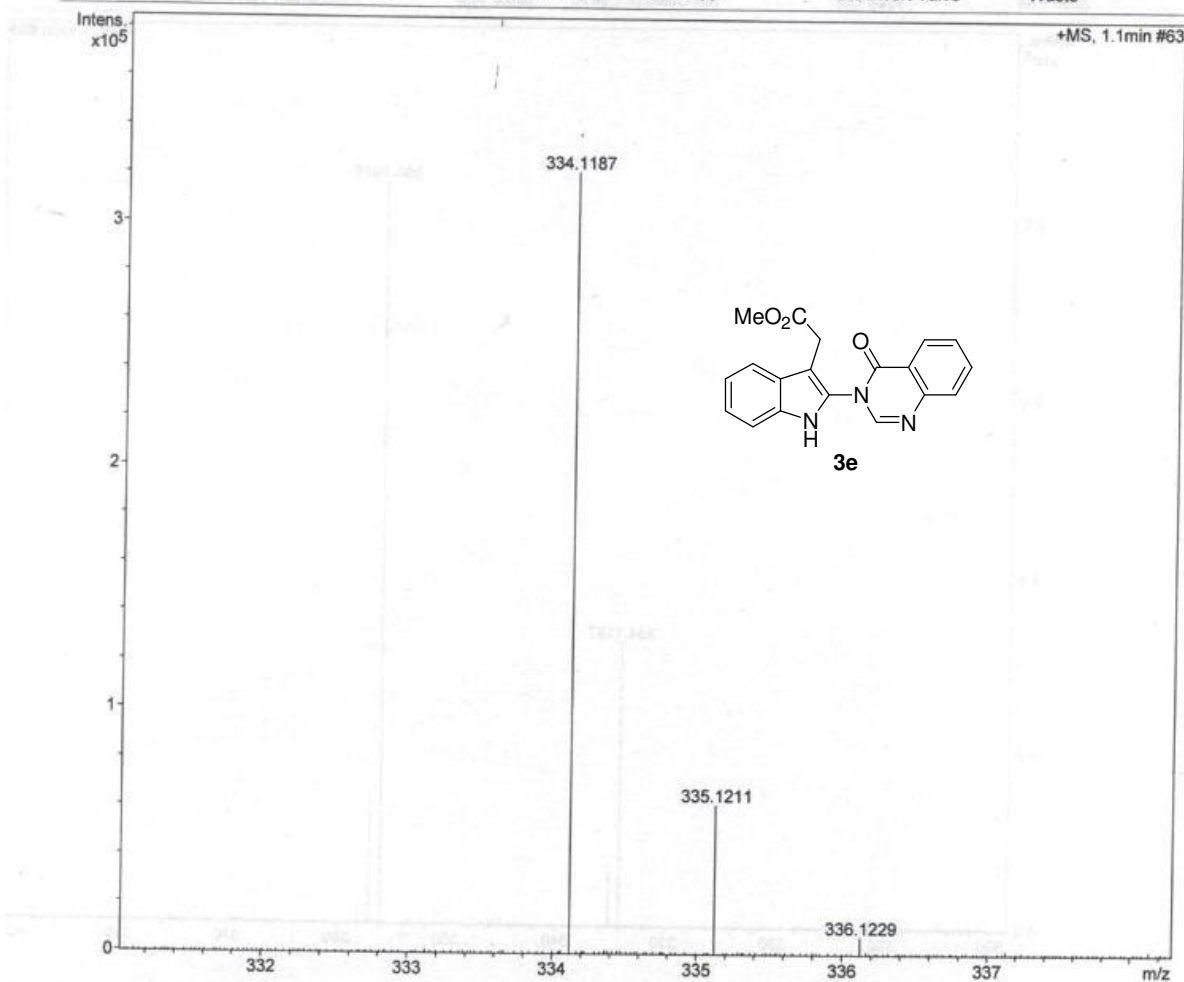

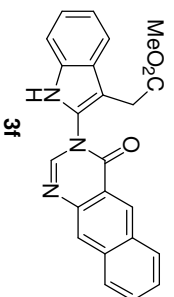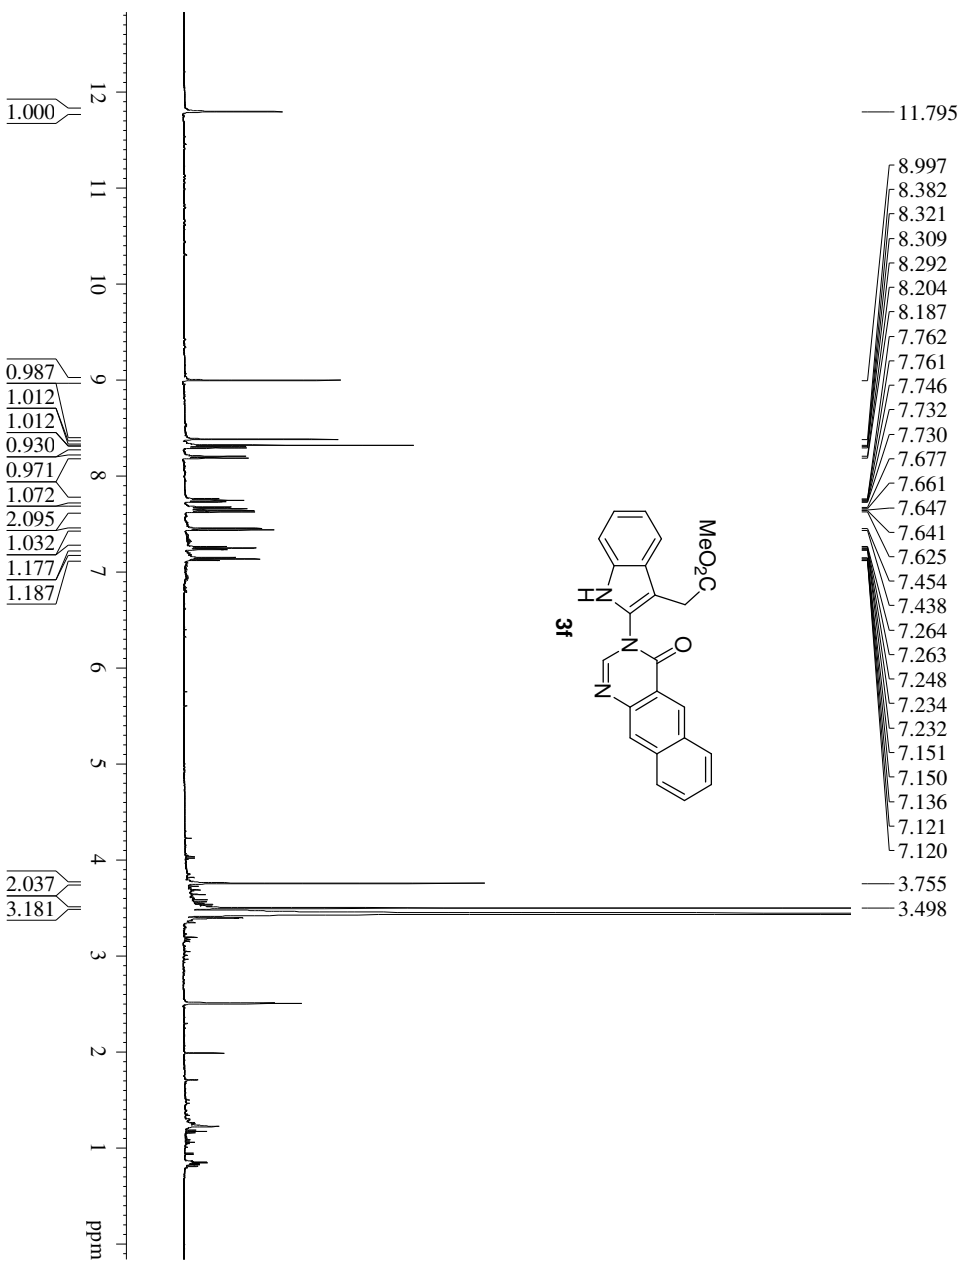

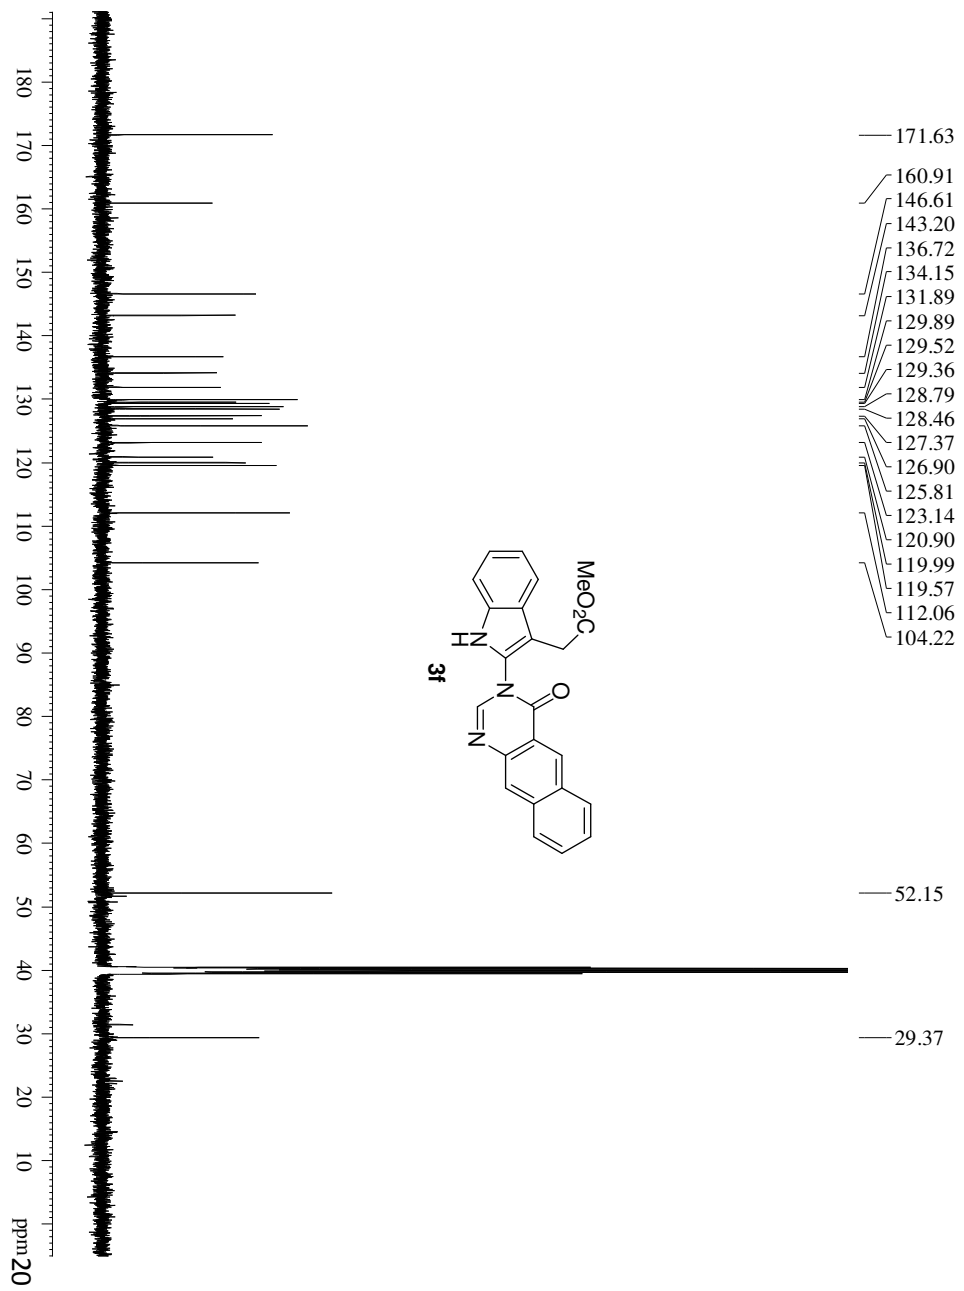

# BRUKER MAXIS HRMS REPORT

School of Chemistry  
University of Hyderabad

## Analysis Info

Analysis Name D:\Data\2013\Dr.NAGARAJANMAY\SKG-114R.d  
Method tune\_low\_Pos.m  
Sample Name SKG-114-DCM-MEOH  
Comment

Acquisition Date 5/23/2013 1:14:06 PM

Operator Ramu Sridhar  
Instrument maXis 10138

## Acquisition Parameter

|             |            |                       |           |                  |           |
|-------------|------------|-----------------------|-----------|------------------|-----------|
| Source Type | ESI        | Ion Polarity          | Positive  | Set Nebulizer    | 4.4 psi   |
| Focus       | Not active | Set Capillary         | 3800 V    | Set Dry Heater   | 180 °C    |
| Scan Begin  | 50 m/z     | Set End Plate Offset  | -500 V    | Set Dry Gas      | 4.0 l/min |
| Scan End    | 1500 m/z   | Set Collision Cell RF | 350.0 Vpp | Set Divert Valve | Waste     |

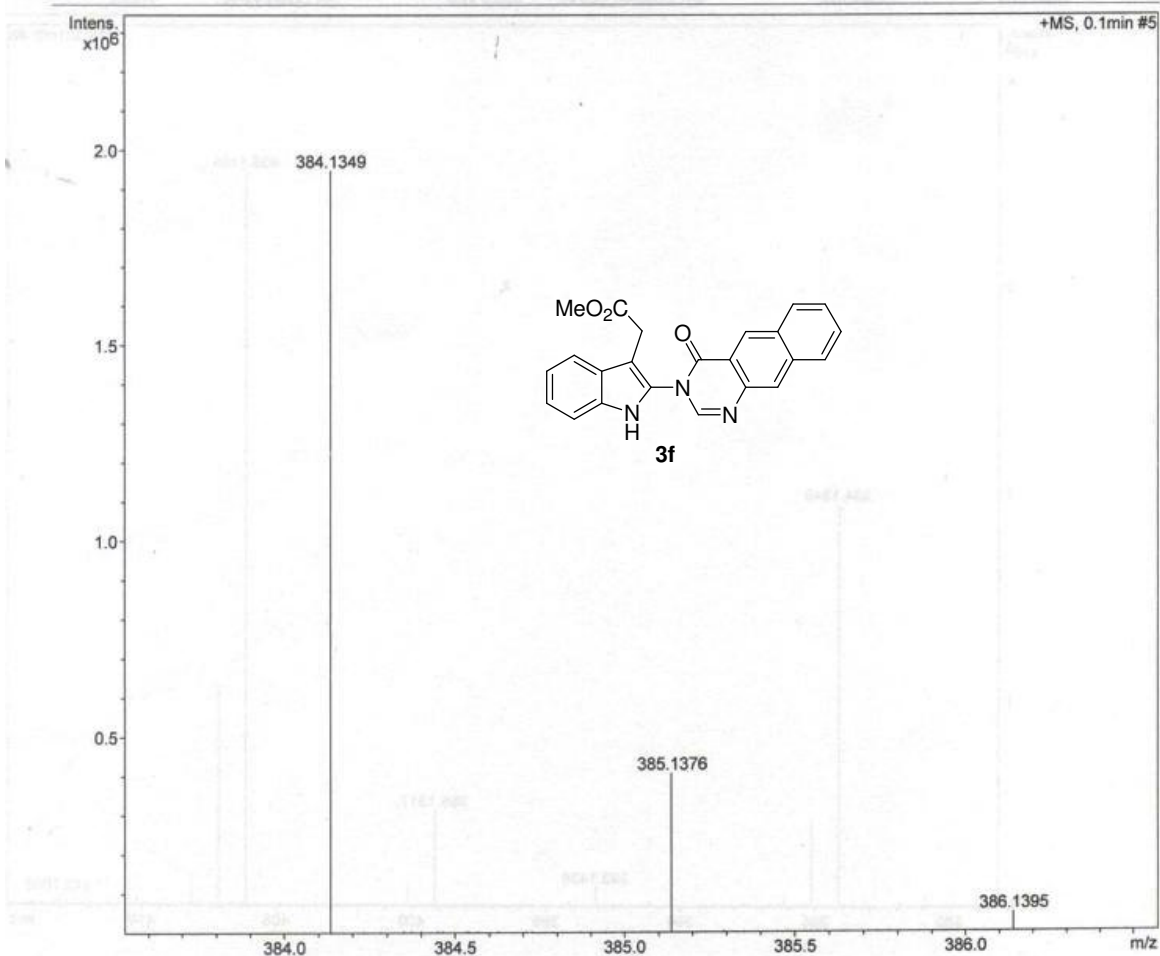

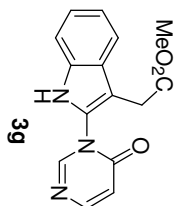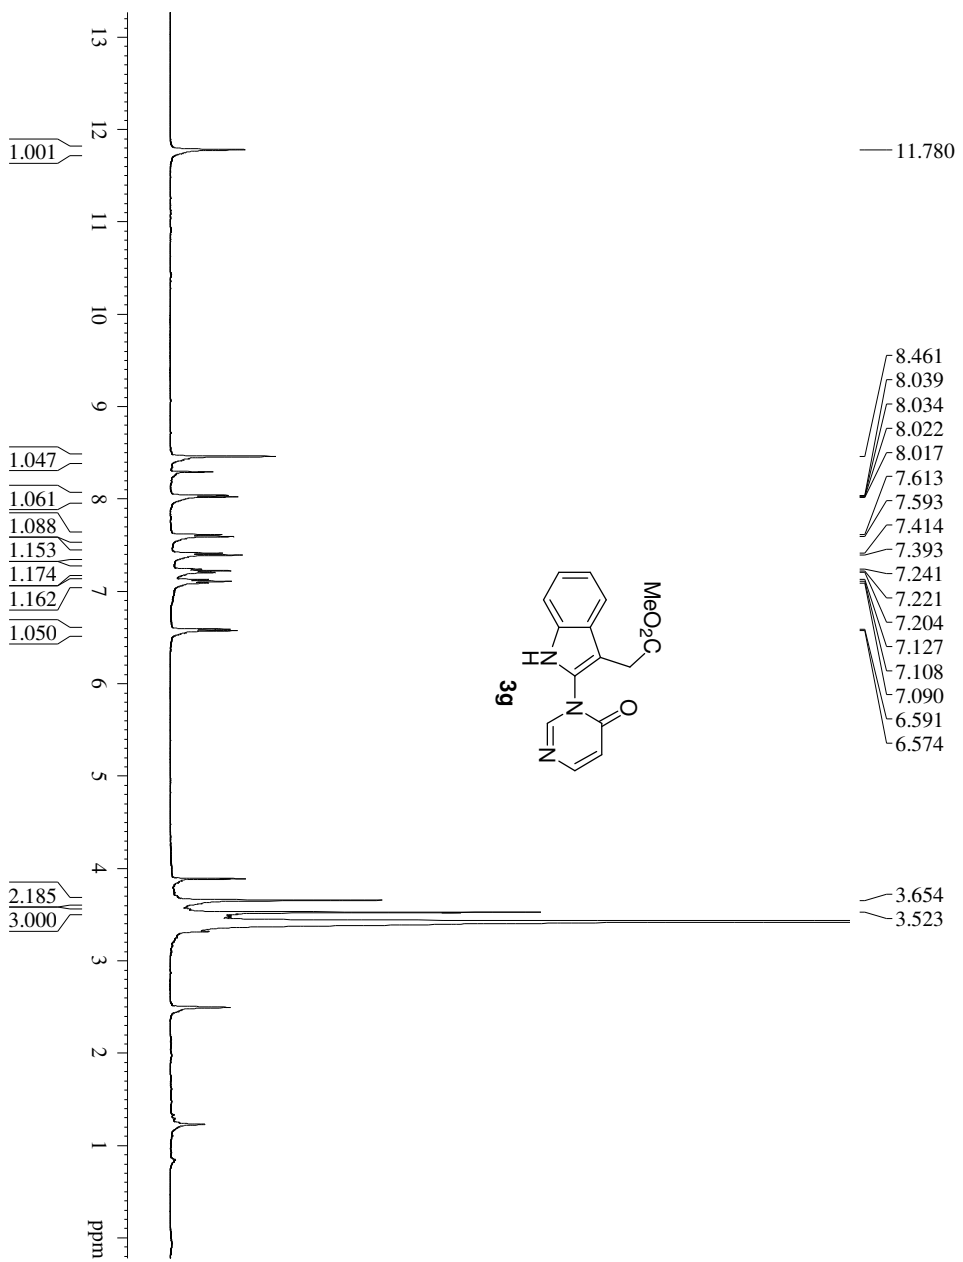

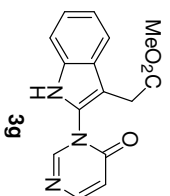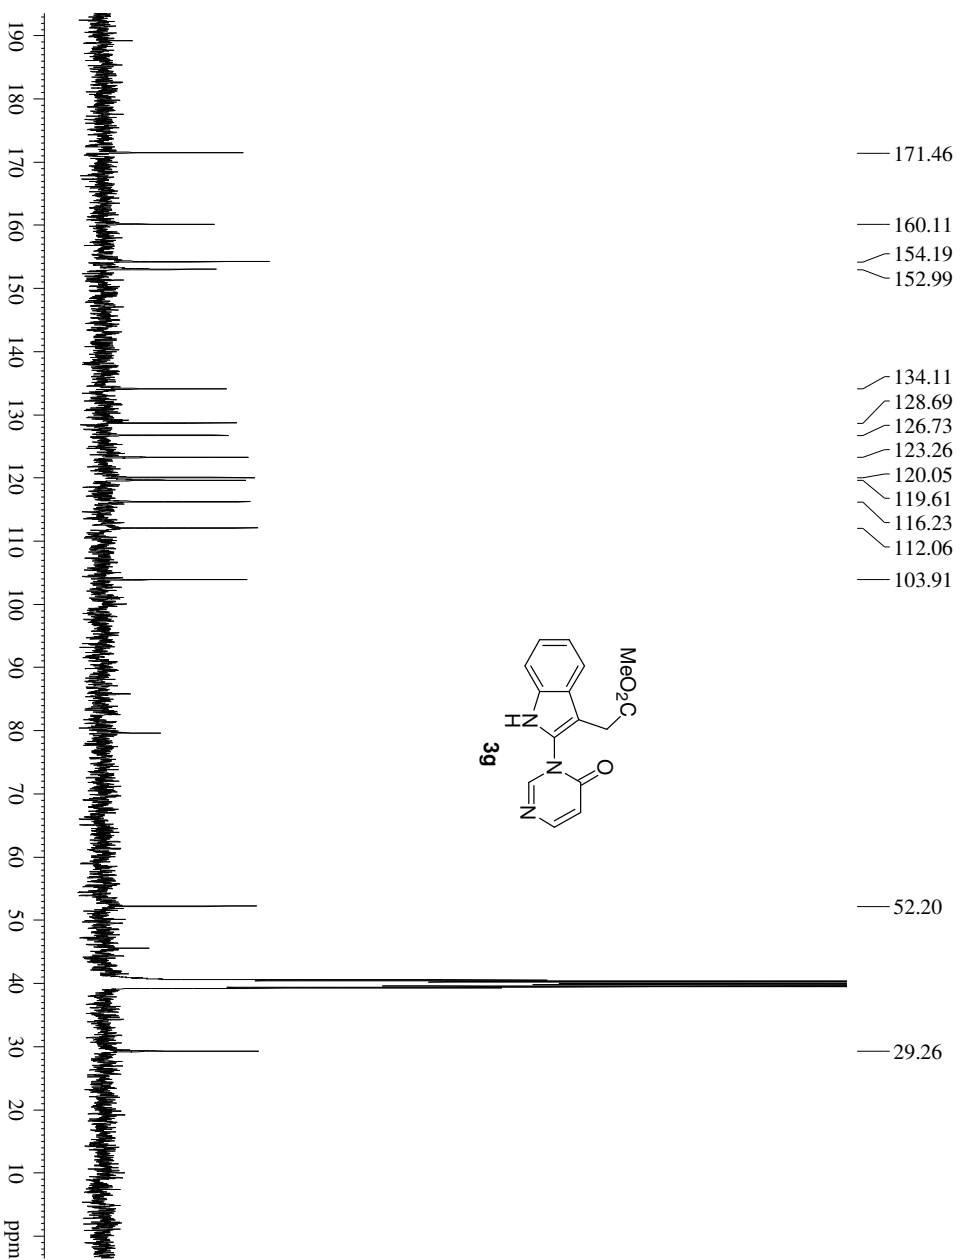

# BRUKER MAXIS HRMS REPORT

School of Chemistry  
University of Hyderabad

## Analysis Info

Analysis Name D:\Data\2013\Dr.NAGARAJANMAYISKG-184.d  
Method tune\_low.m  
Sample Name SKG-184-DCM-MEOH  
Comment

Acquisition Date 5/23/2013 12:43:19 PM

Operator Ramu Sridhar  
Instrument maXis 10138

## Acquisition Parameter

|             |            |                       |           |                  |           |
|-------------|------------|-----------------------|-----------|------------------|-----------|
| Source Type | ESI        | Ion Polarity          | Positive  | Set Nebulizer    | 4.4 psi   |
| Focus       | Not active | Set Capillary         | 3500 V    | Set Dry Heater   | 200 °C    |
| Scan Begin  | 50 m/z     | Set End Plate Offset  | -500 V    | Set Dry Gas      | 4.0 l/min |
| Scan End    | 1800 m/z   | Set Collision Cell RF | 350.0 Vpp | Set Divert Valve | Waste     |

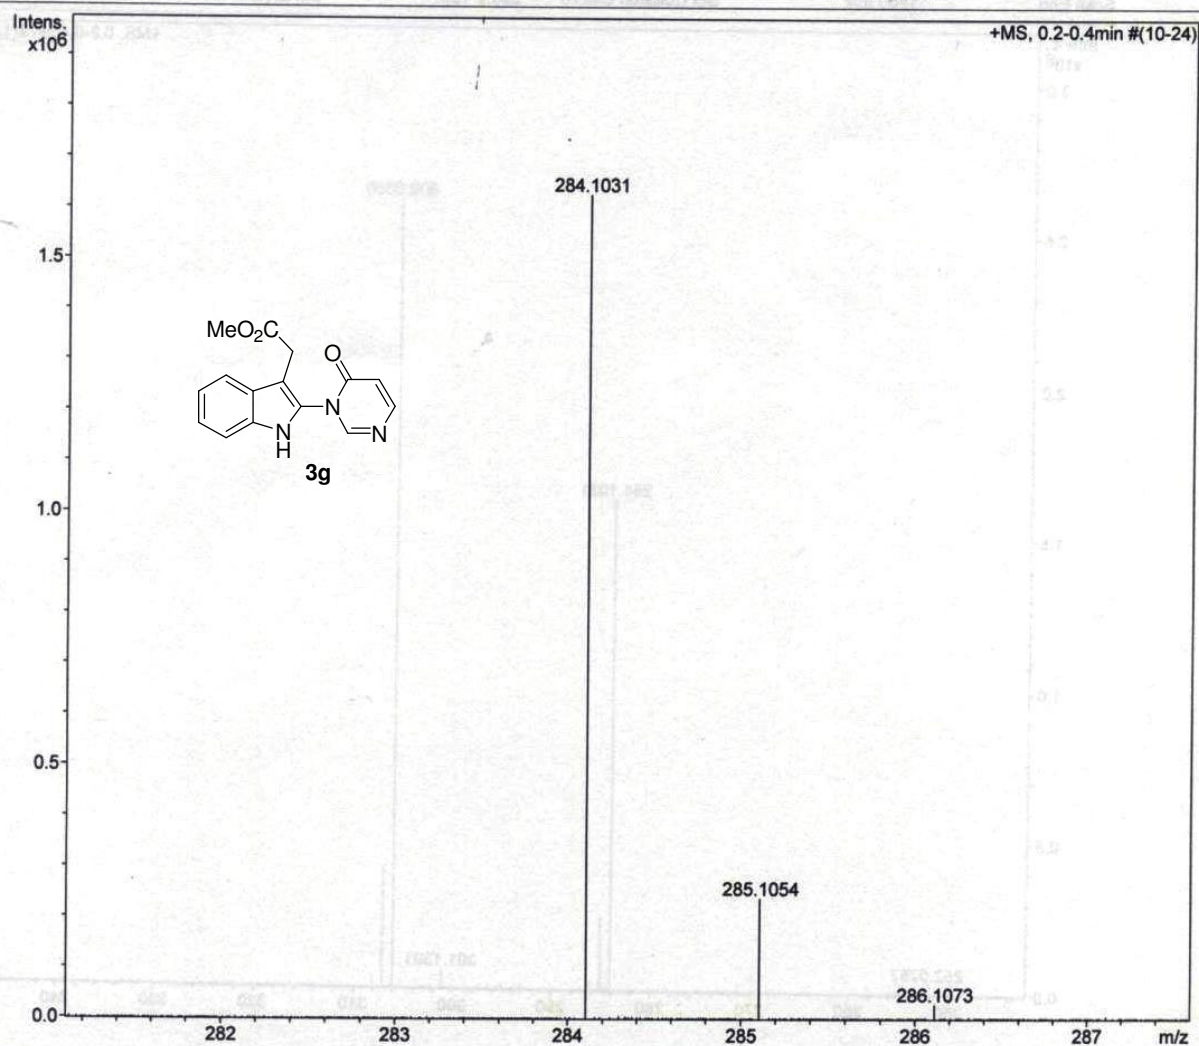



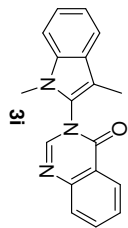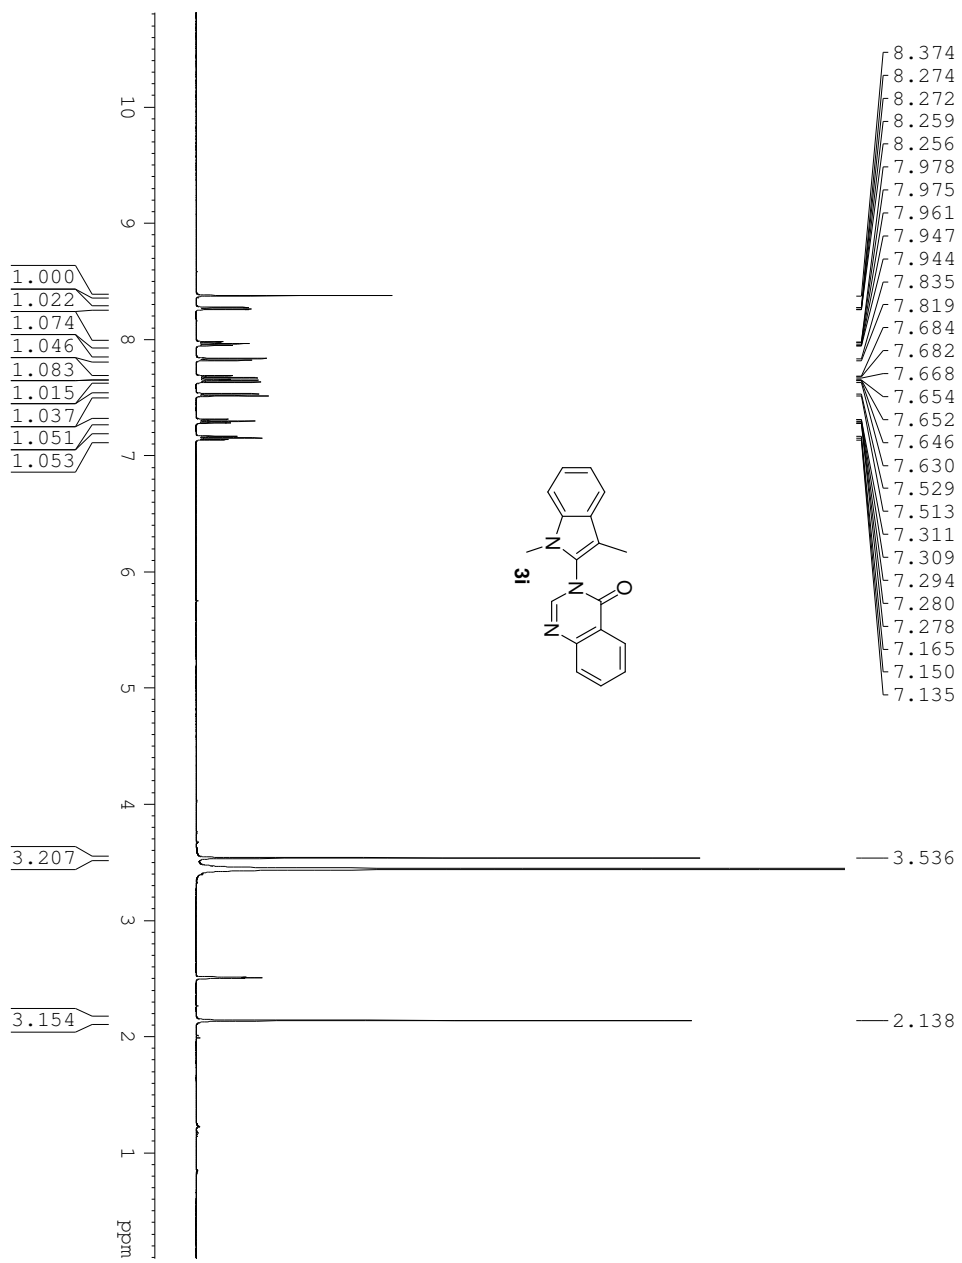

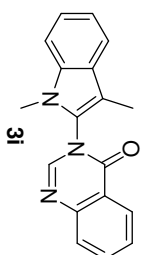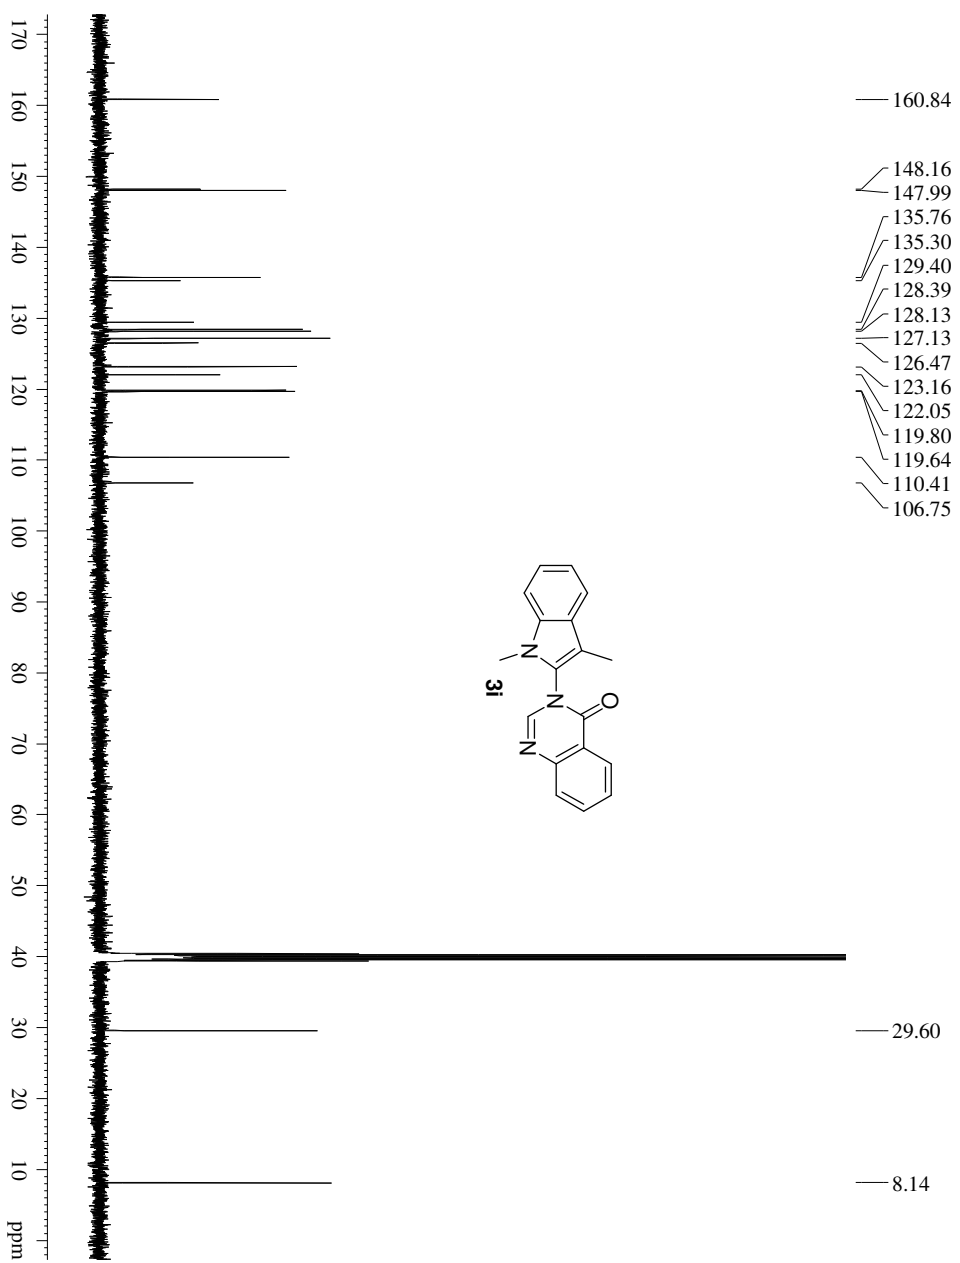

# BRUKER MAXIS HRMS REPORT

School of Chemistry  
University of Hyderabad

## Analysis Info

Analysis Name D:\Data\2013\Dr.NAGARAJANJUNE\SKG-92.d  
Method tune\_low.m  
Sample Name SKG-92-DCM-MEOH  
Comment

Acquisition Date 6/4/2013 11:45:32 AM  
Operator Ramu Sridhar  
Instrument maXis 10138

## Acquisition Parameter

|             |            |                       |           |                  |           |
|-------------|------------|-----------------------|-----------|------------------|-----------|
| Source Type | ESI        | Ion Polarity          | Positive  | Set Nebulizer    | 4.4 psi   |
| Focus       | Not active | Set Capillary         | 3500 V    | Set Dry Heater   | 200 °C    |
| Scan Begin  | 50 m/z     | Set End Plate Offset  | -500 V    | Set Dry Gas      | 4.0 l/min |
| Scan End    | 1800 m/z   | Set Collision Cell RF | 350.0 Vpp | Set Divert Valve | Waste     |

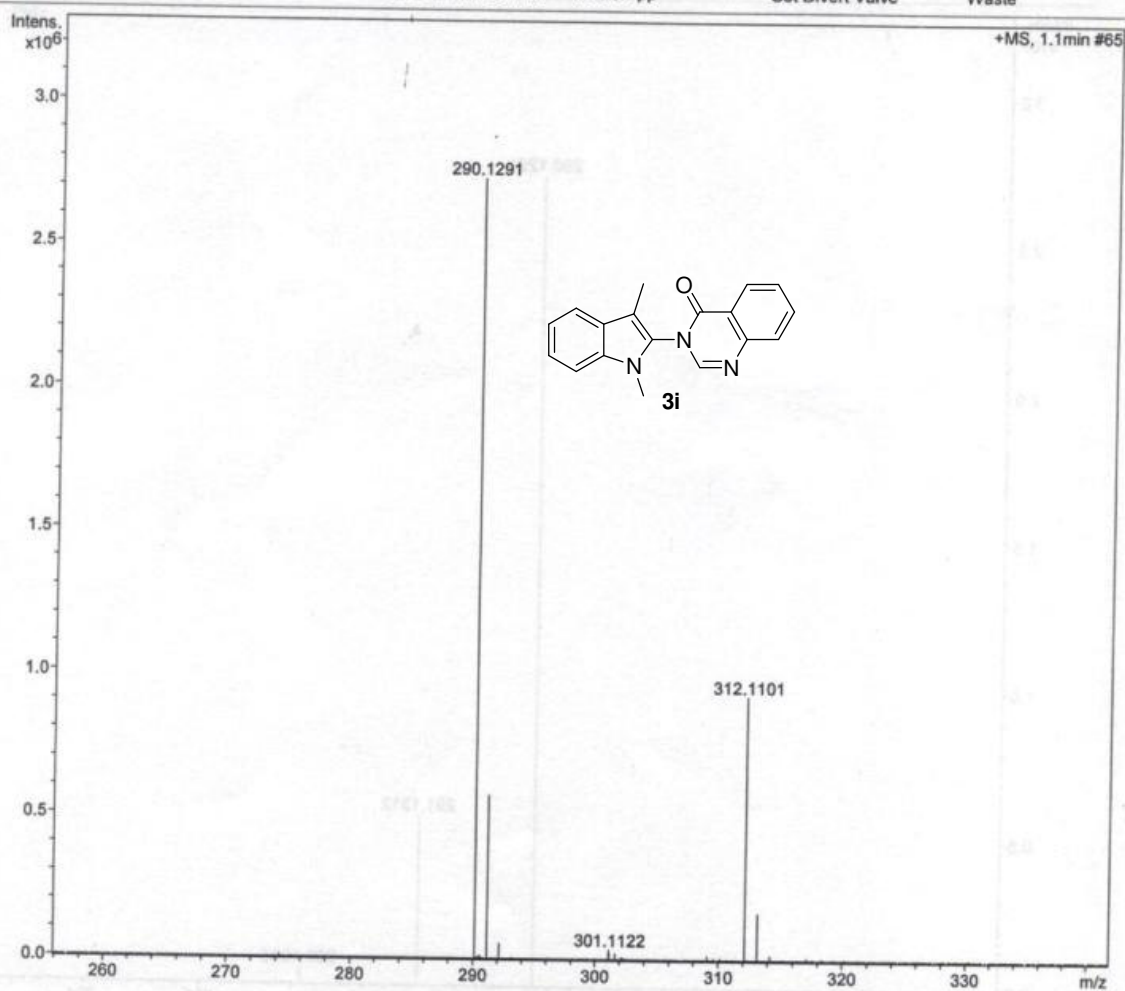

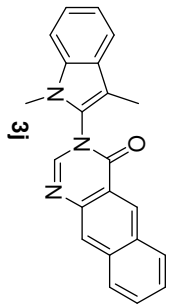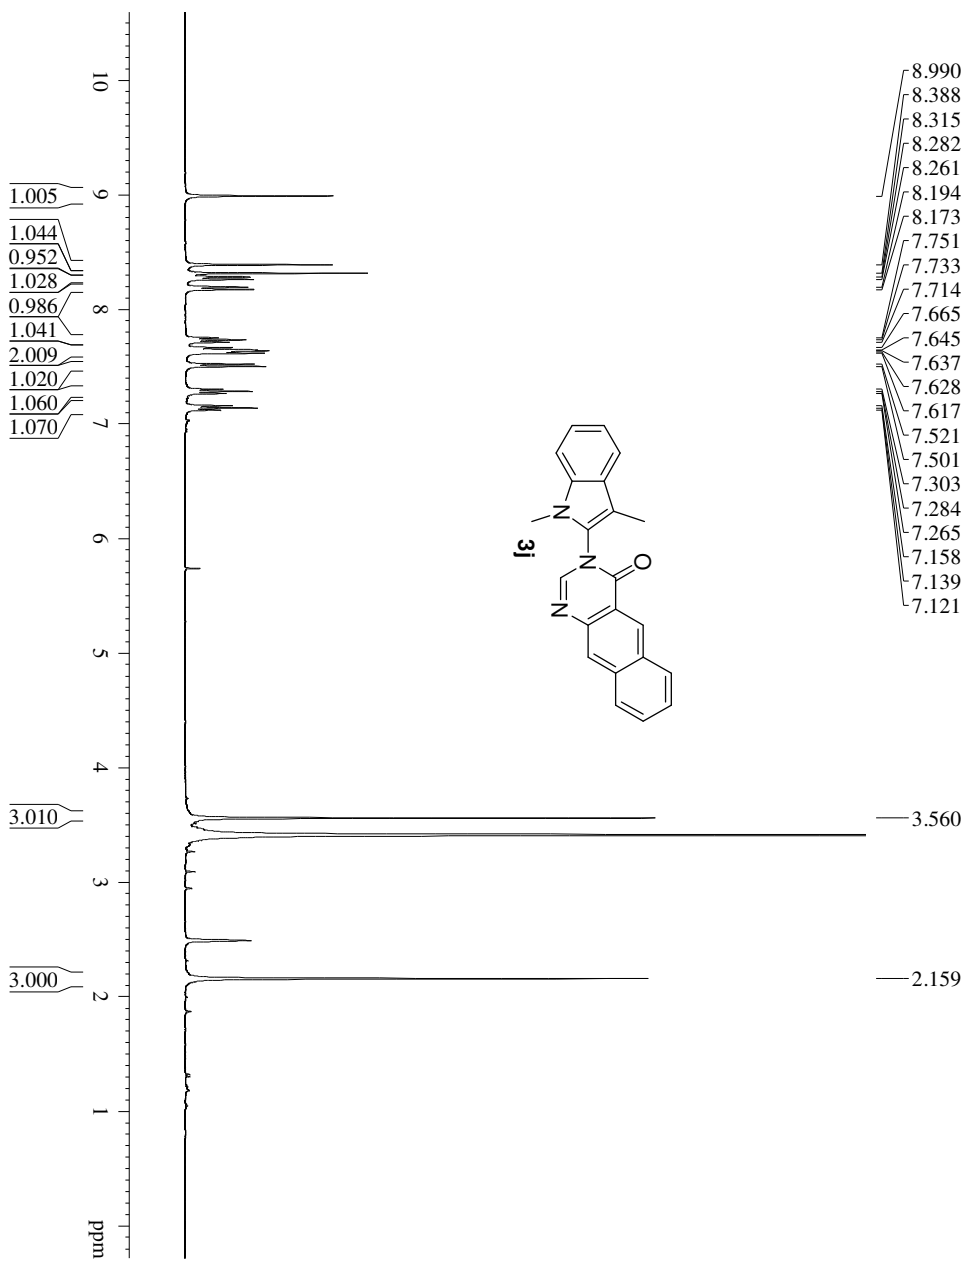

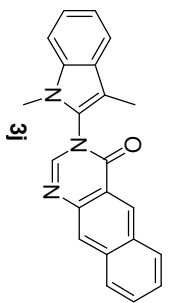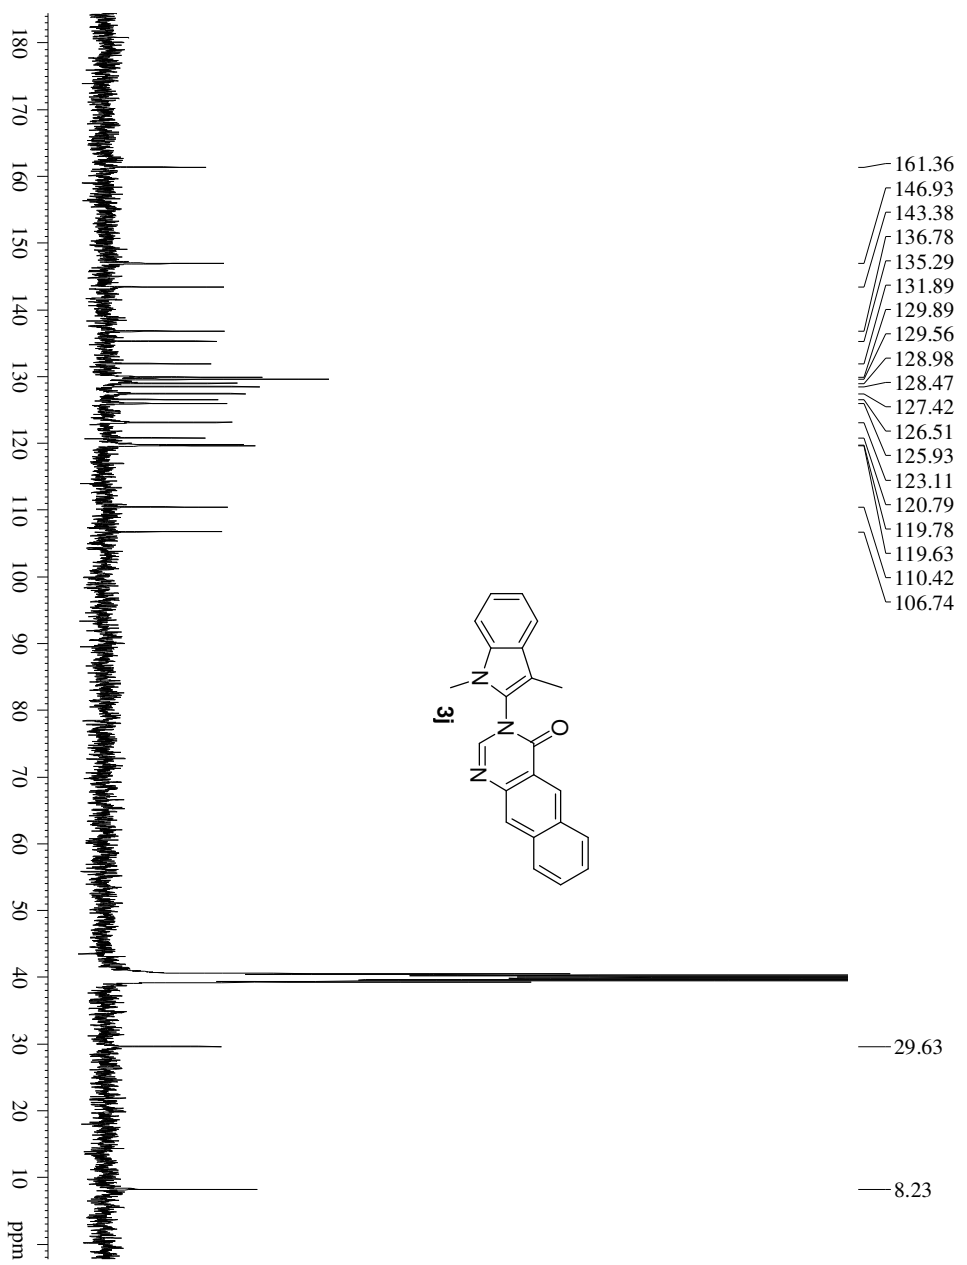

# BRUKER MAXIS HRMS REPORT

School of Chemistry  
University of Hyderabad

## Analysis Info

Analysis Name D:\Data\2013\Dr.NAGARAJAN\JUNE\SKG-122.d  
Method tune\_low\_Pos.m  
Sample Name SKG-122--DCM-MEOH  
Comment

Acquisition Date 6/4/2013 12:57:09 PM  
Operator Ramu Sridhar  
Instrument maXis 10138

## Acquisition Parameter

|             |            |                       |           |                  |           |
|-------------|------------|-----------------------|-----------|------------------|-----------|
| Source Type | ESI        | Ion Polarity          | Positive  | Set Nebulizer    | 4.4 psi   |
| Focus       | Not active | Set Capillary         | 3800 V    | Set Dry Heater   | 180 °C    |
| Scan Begin  | 50 m/z     | Set End Plate Offset  | -500 V    | Set Dry Gas      | 4.0 l/min |
| Scan End    | 1500 m/z   | Set Collision Cell RF | 350.0 Vpp | Set Divert Valve | Waste     |

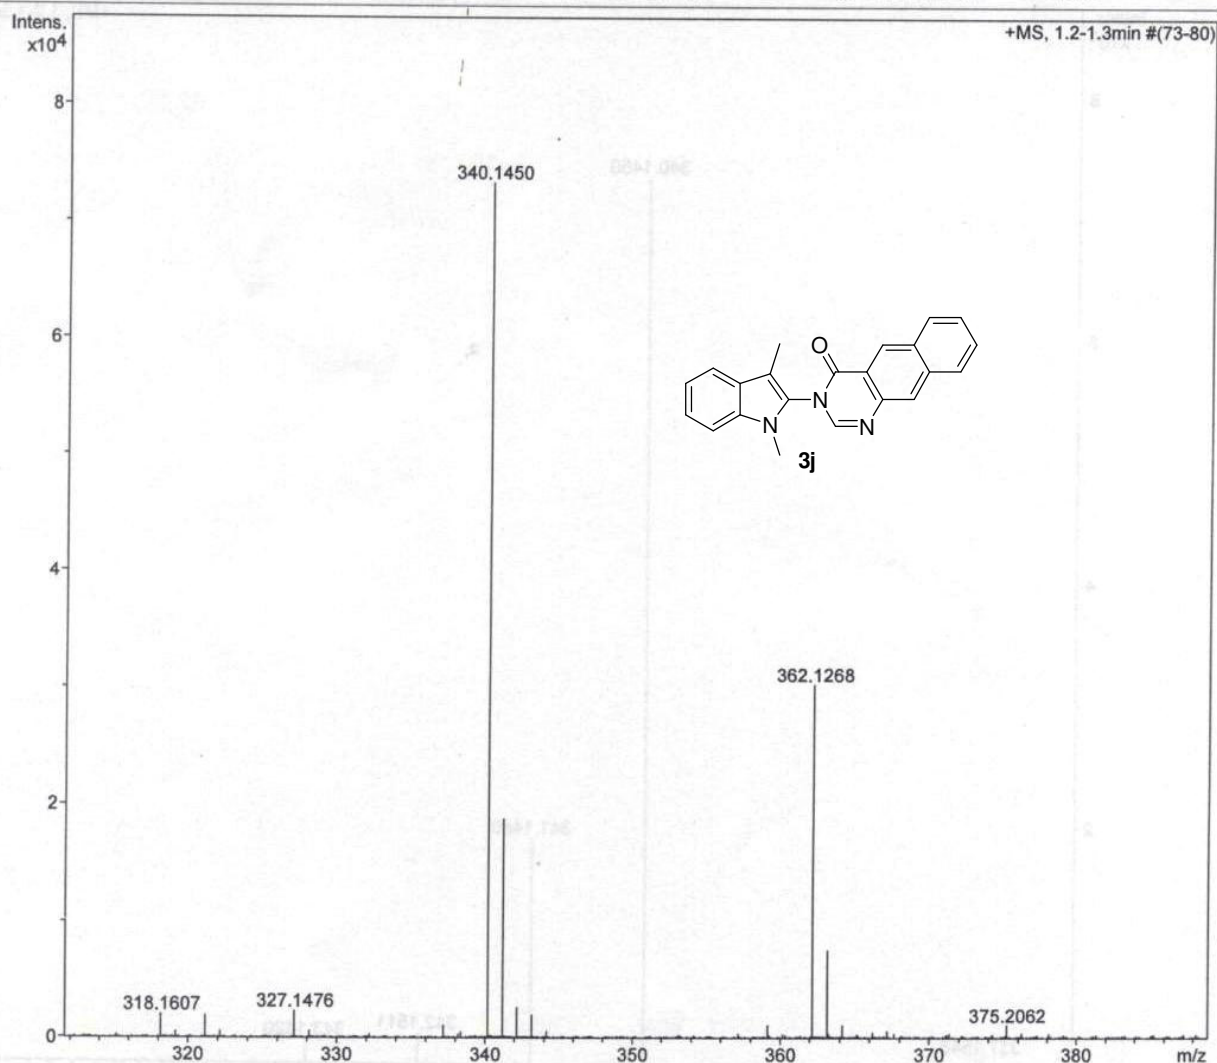

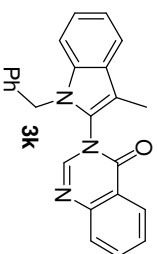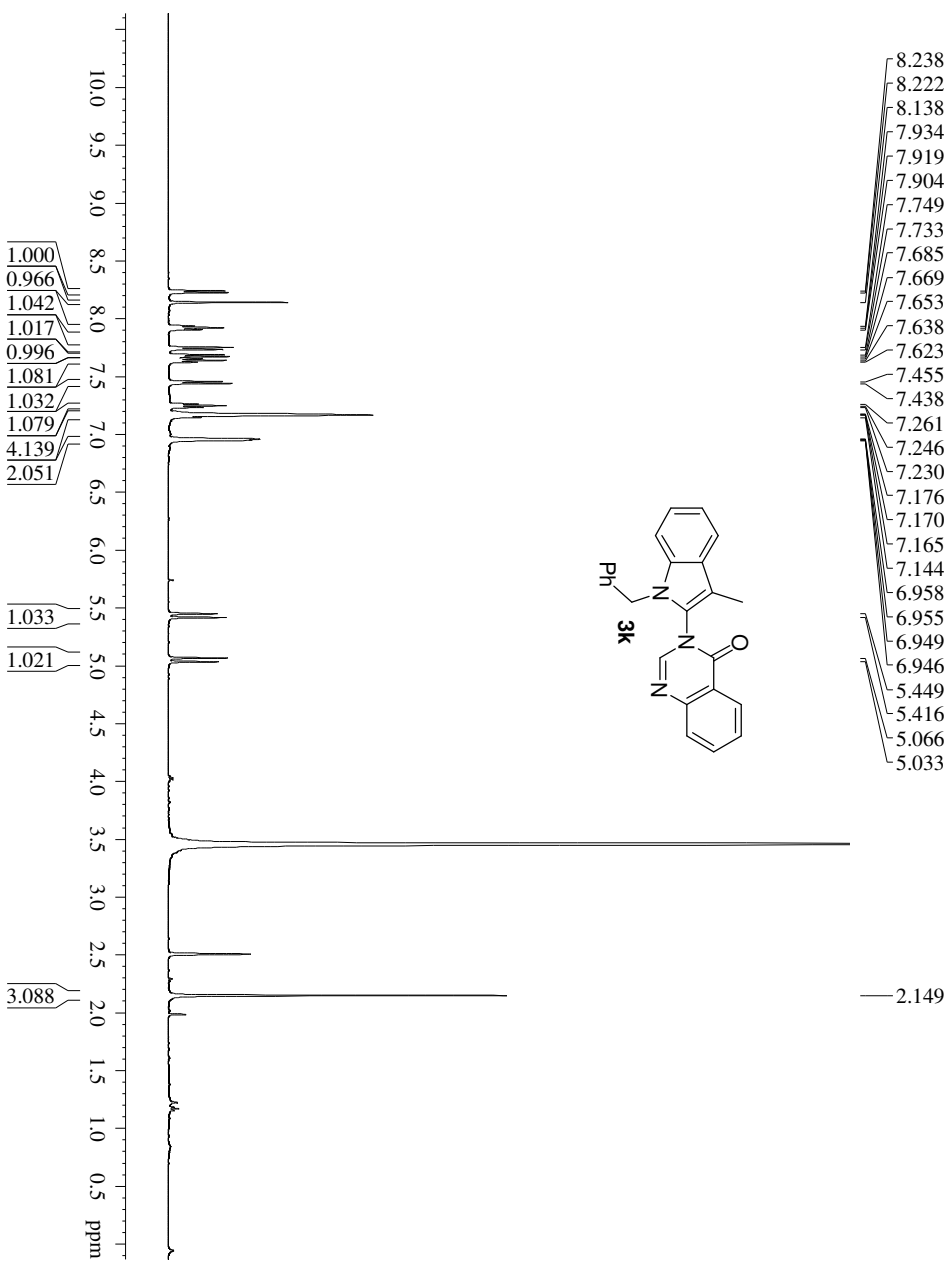

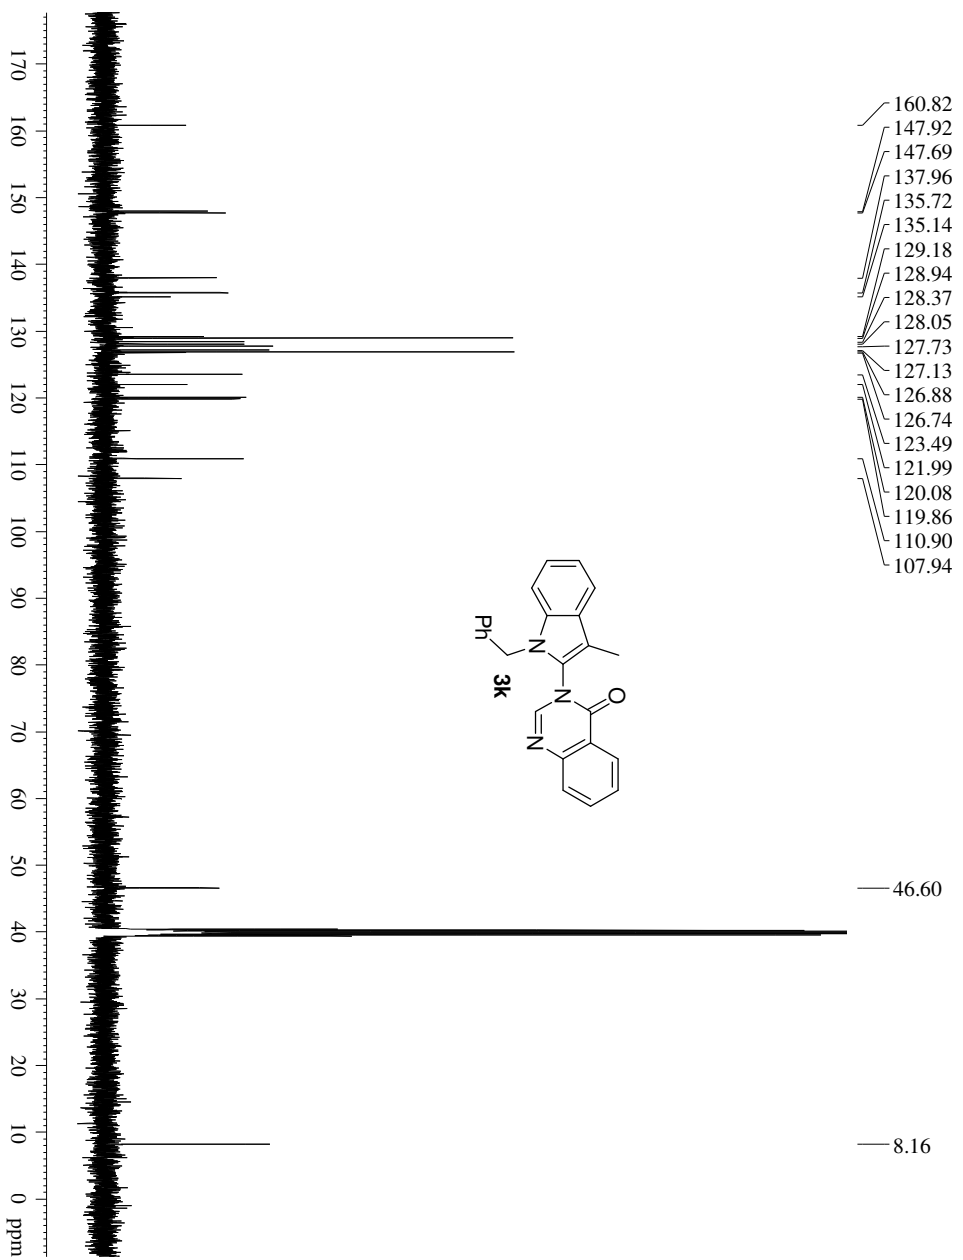



# BRUKER MAXIS HRMS REPORT

School of Chemistry  
University of Hyderabad

## Analysis Info

Analysis Name D:\Data\2013\Dr.NAGARAJANJUNE\SKG-101.d  
Method tune\_low\_Pos.m  
Sample Name SKG-101-DCM-MEOH  
Comment

Acquisition Date 6/4/2013 12:17:18 PM

Operator Ramu Sridhar  
Instrument maXis 10138

## Acquisition Parameter

|             |            |                       |           |                  |           |
|-------------|------------|-----------------------|-----------|------------------|-----------|
| Source Type | ESI        | Ion Polarity          | Positive  | Set Nebulizer    | 4.4 psi   |
| Focus       | Not active | Set Capillary         | 3800 V    | Set Dry Heater   | 180 °C    |
| Scan Begin  | 50 m/z     | Set End Plate Offset  | -500 V    | Set Dry Gas      | 4.0 l/min |
| Scan End    | 1500 m/z   | Set Collision Cell RF | 350.0 Vpp | Set Divert Valve | Waste     |

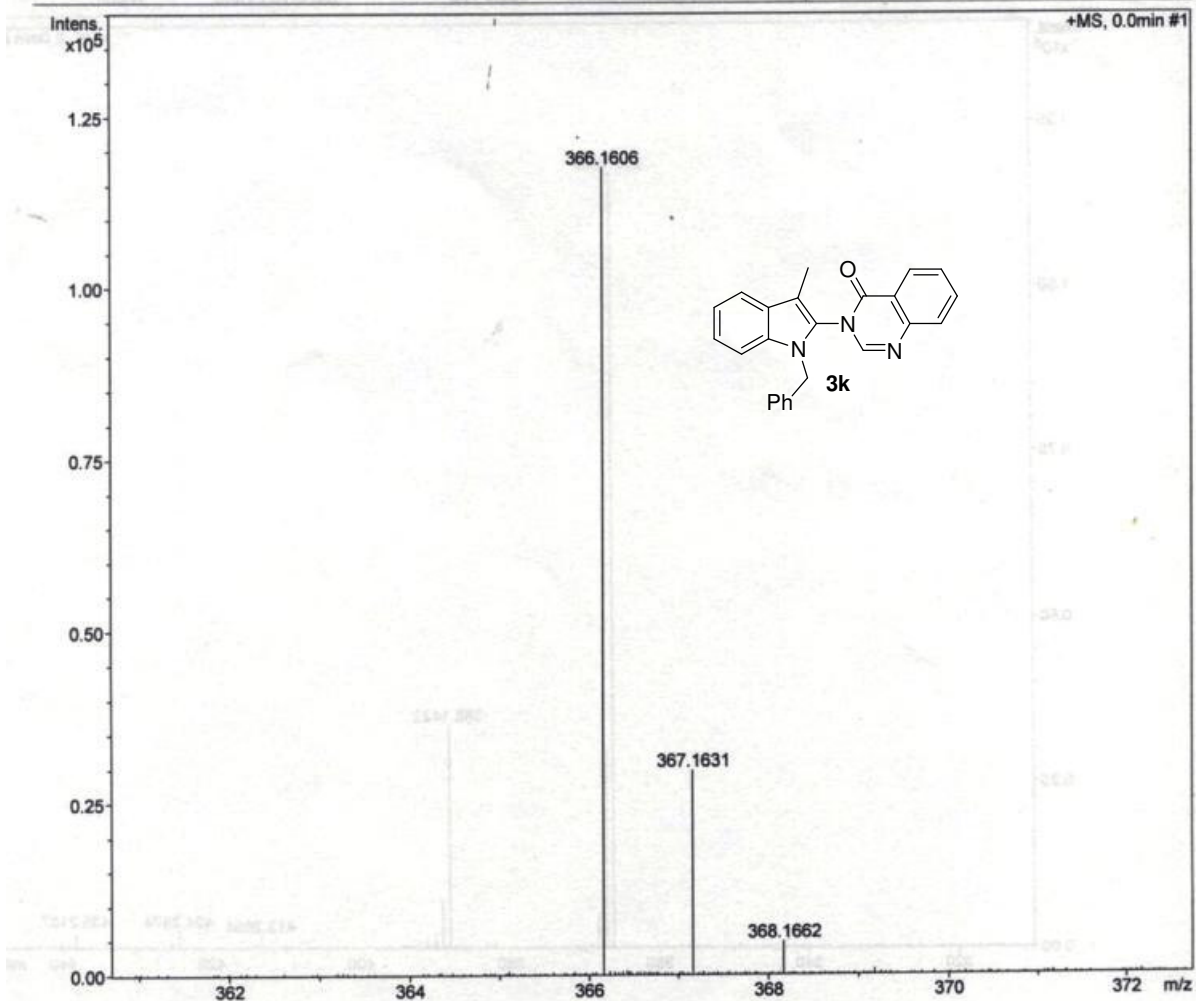

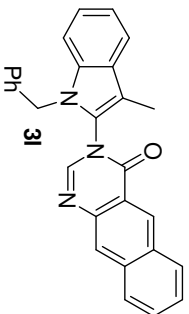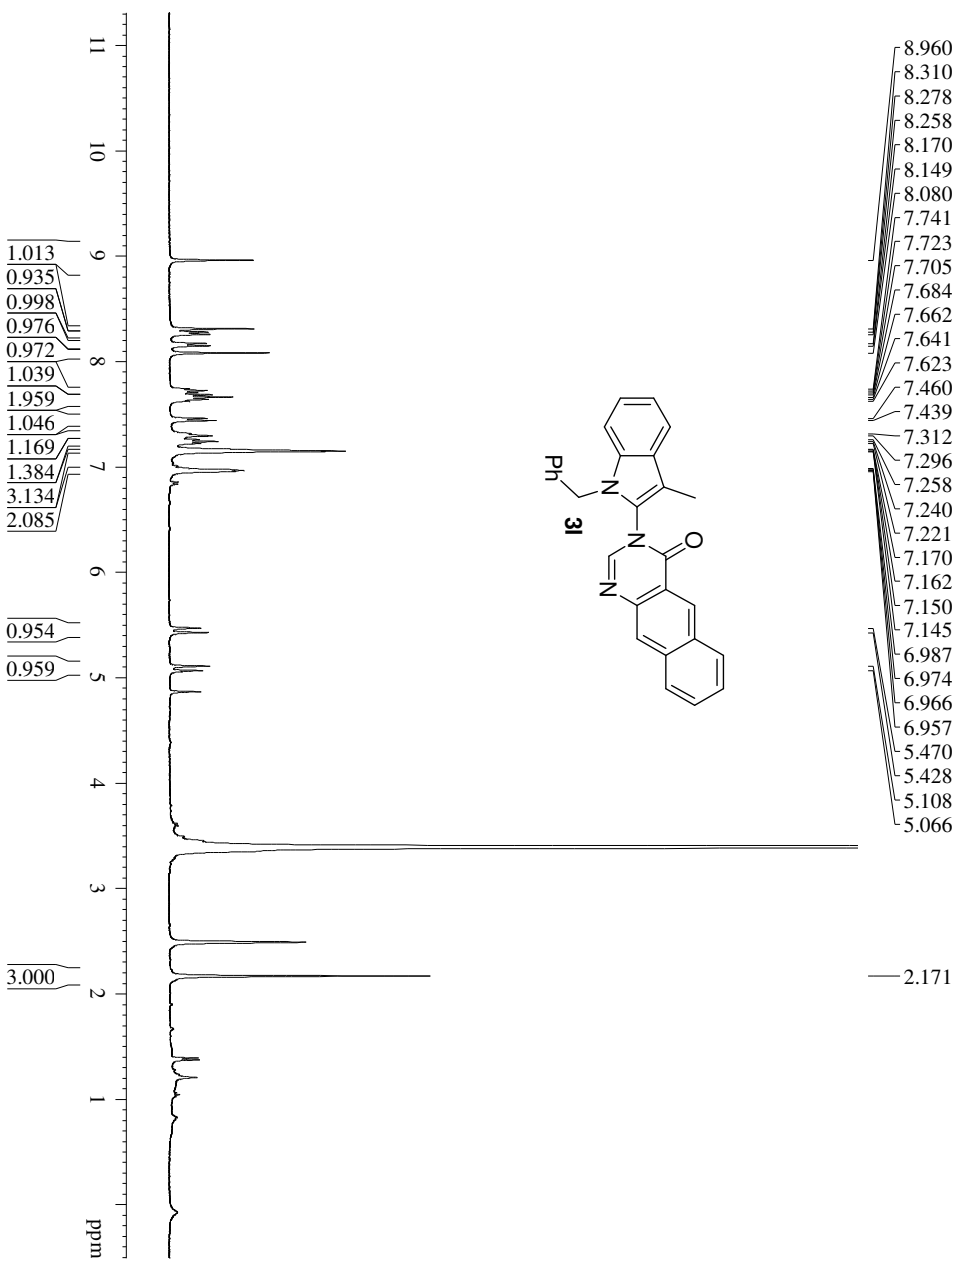

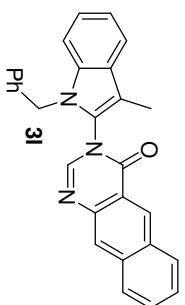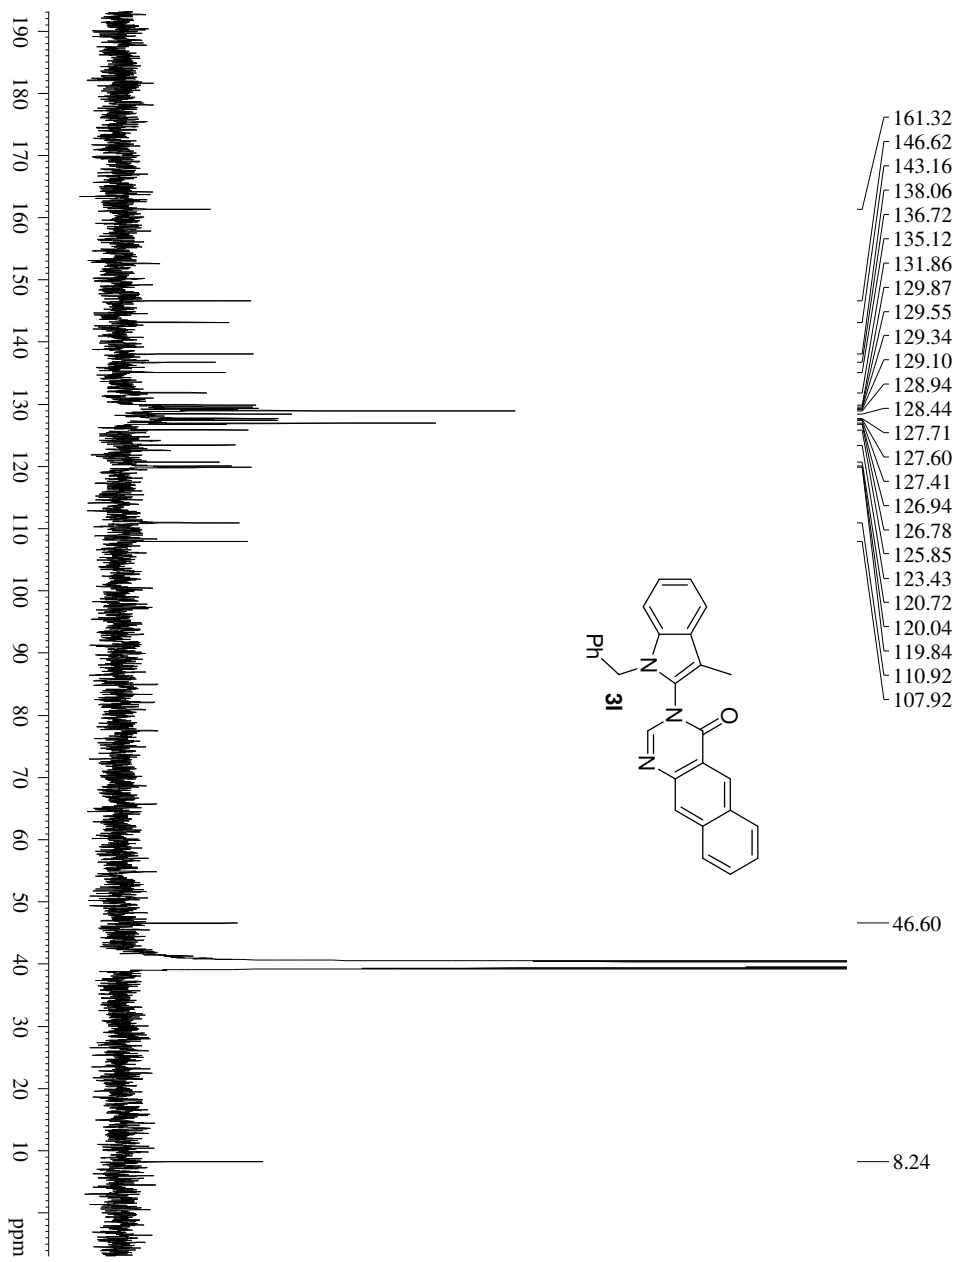

# BRUKER MAXIS HRMS REPORT

School of Chemistry  
University of Hyderabad

## Analysis Info

Analysis Name D:\Data\2013\Dr.NAGARAJAN\JUNE\SKG-123.d  
Method tune\_low\_Pos.m  
Sample Name SKG-123--DCM-MEOH  
Comment

Acquisition Date 6/4/2013 12:33:41 PM

Operator Ramu Sridhar  
Instrument maXis 10138

## Acquisition Parameter

|             |            |                       |           |                  |           |
|-------------|------------|-----------------------|-----------|------------------|-----------|
| Source Type | ESI        | Ion Polarity          | Positive  | Set Nebulizer    | 4.4 psi   |
| Focus       | Not active | Set Capillary         | 3800 V    | Set Dry Heater   | 180 °C    |
| Scan Begin  | 50 m/z     | Set End Plate Offset  | -500 V    | Set Dry Gas      | 4.0 l/min |
| Scan End    | 1500 m/z   | Set Collision Cell RF | 350.0 Vpp | Set Divert Valve | Waste     |

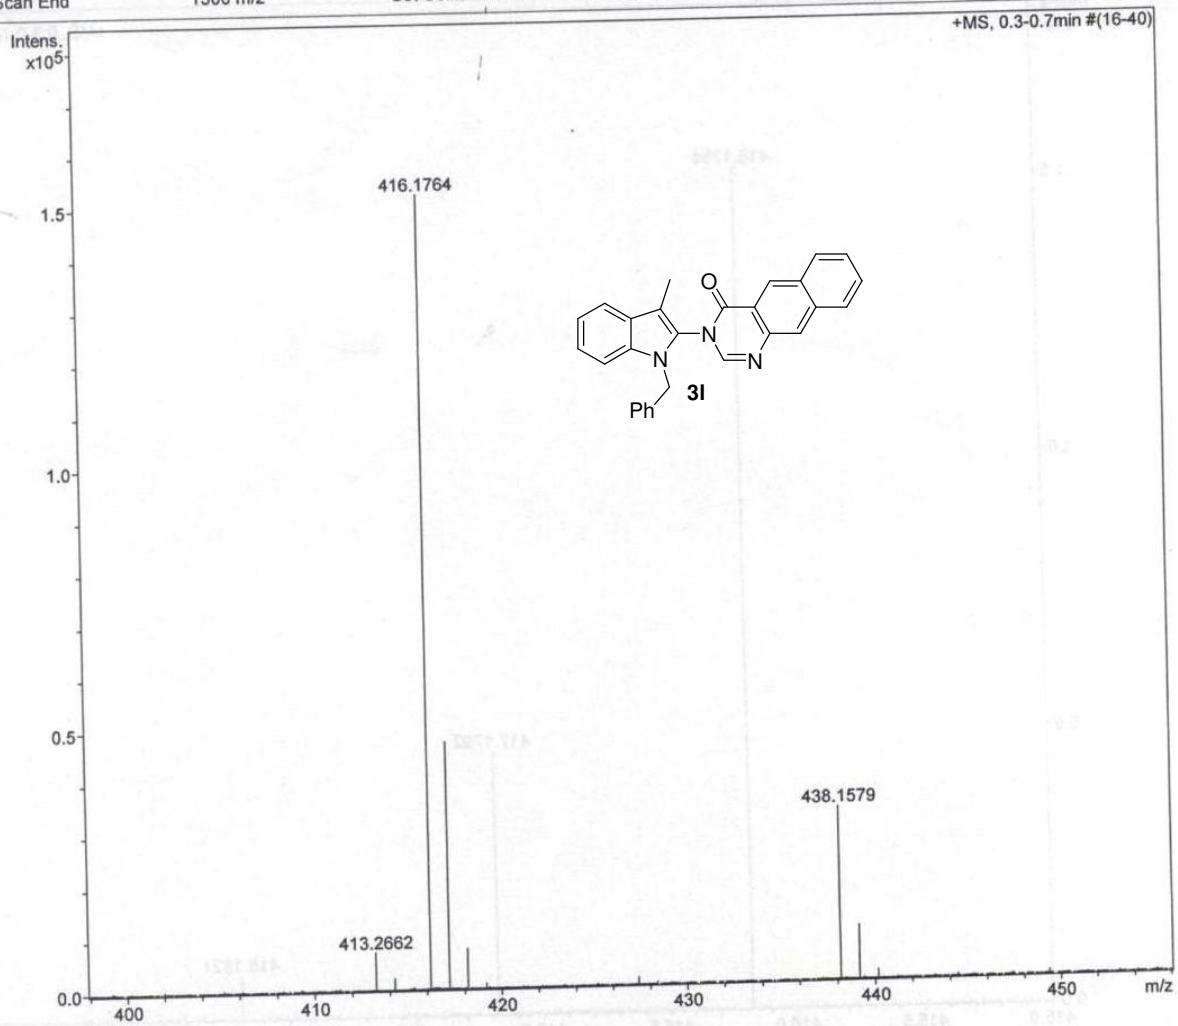

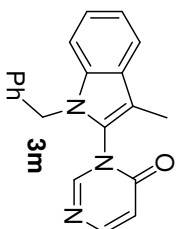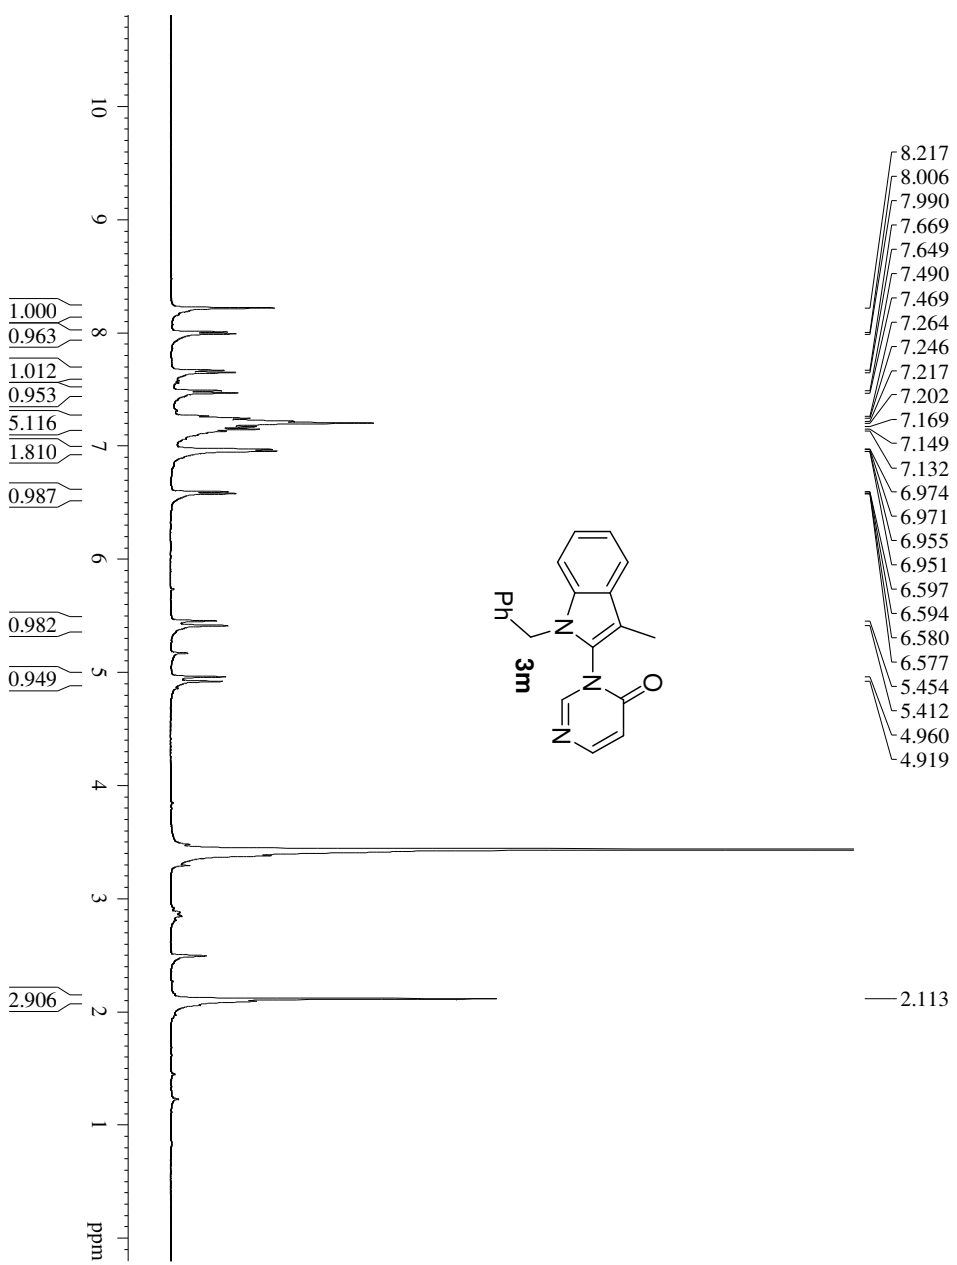

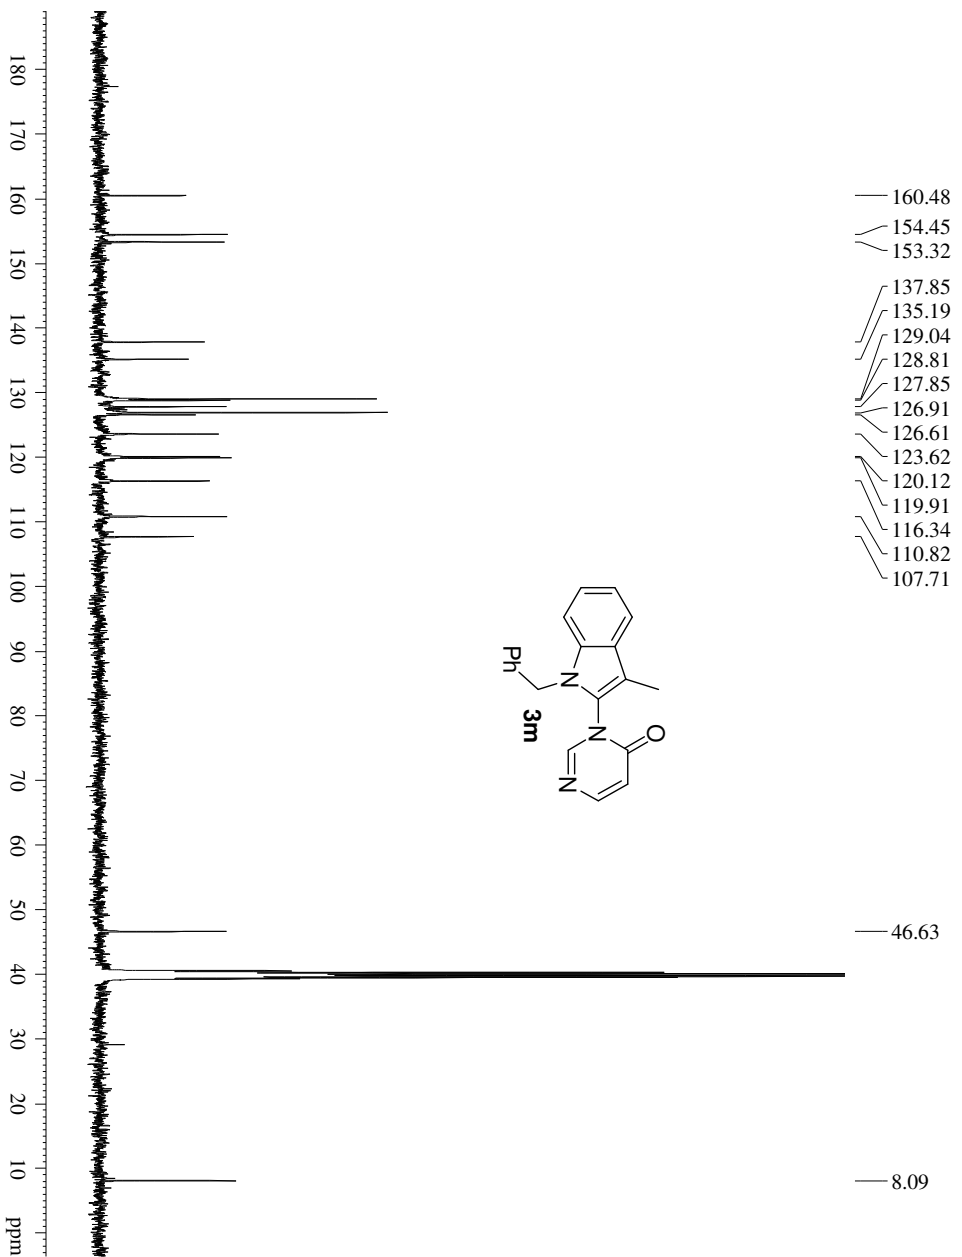

# BRUKER MAXIS HRMS REPORT

School of Chemistry  
University of Hyderabad

## Analysis Info

Analysis Name D:\Data\2013\Dr.NAGARAJANMAY\SKG-183.d  
Method tune\_low.m  
Sample Name SKG-183-DCM-MEOH  
Comment

Acquisition Date 5/23/2013 12:52:31 PM

Operator Ramu Sridhar  
Instrument maXis 10138

## Acquisition Parameter

|             |            |                       |           |                  |           |
|-------------|------------|-----------------------|-----------|------------------|-----------|
| Source Type | ESI        | Ion Polarity          | Positive  | Set Nebulizer    | 4.4 psi   |
| Focus       | Not active | Set Capillary         | 3500 V    | Set Dry Heater   | 200 °C    |
| Scan Begin  | 50 m/z     | Set End Plate Offset  | -500 V    | Set Dry Gas      | 4.0 l/min |
| Scan End    | 1800 m/z   | Set Collision Cell RF | 350.0 Vpp | Set Divert Valve | Waste     |

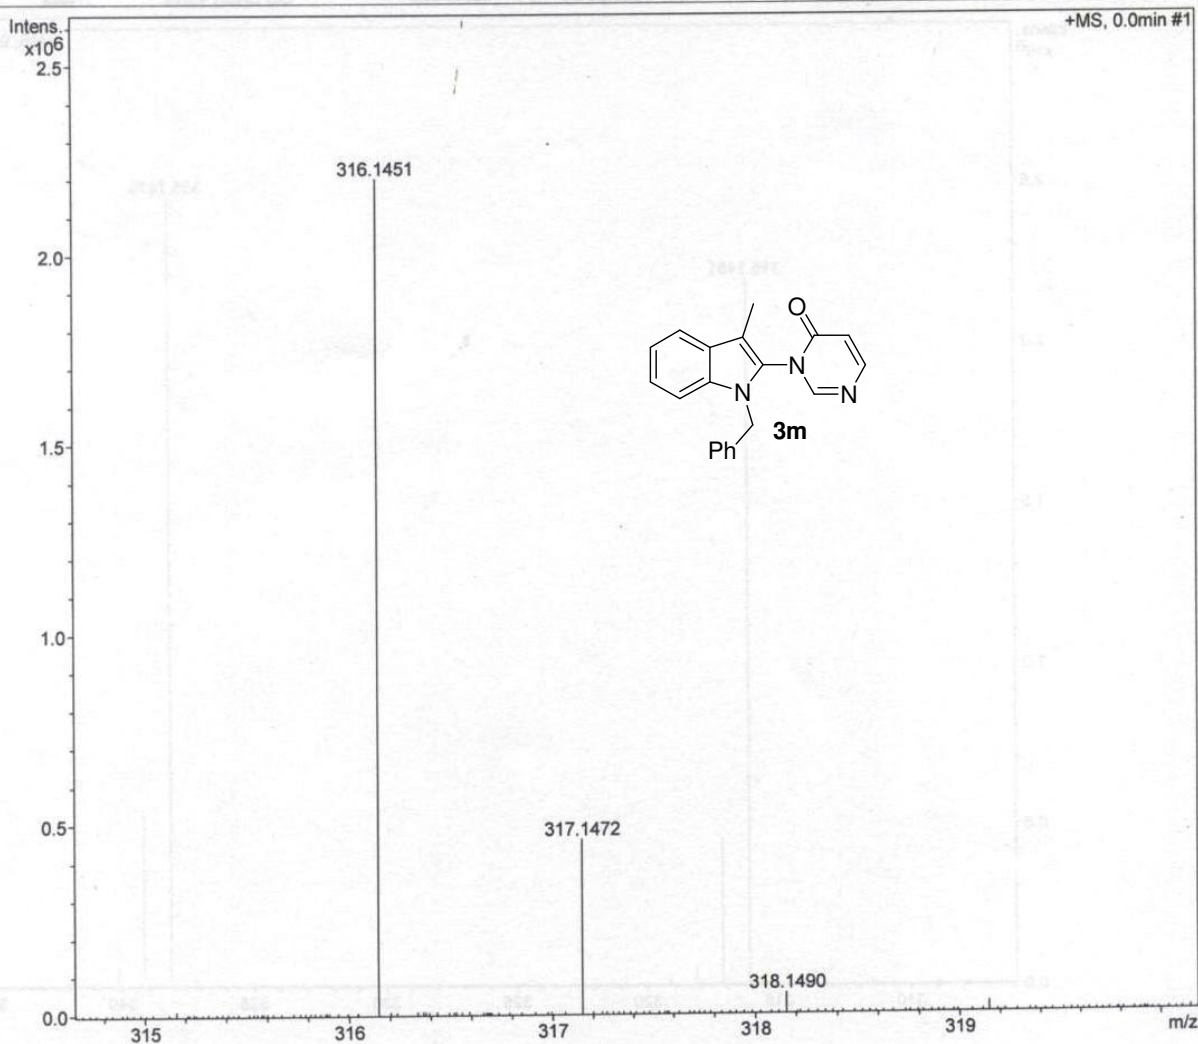

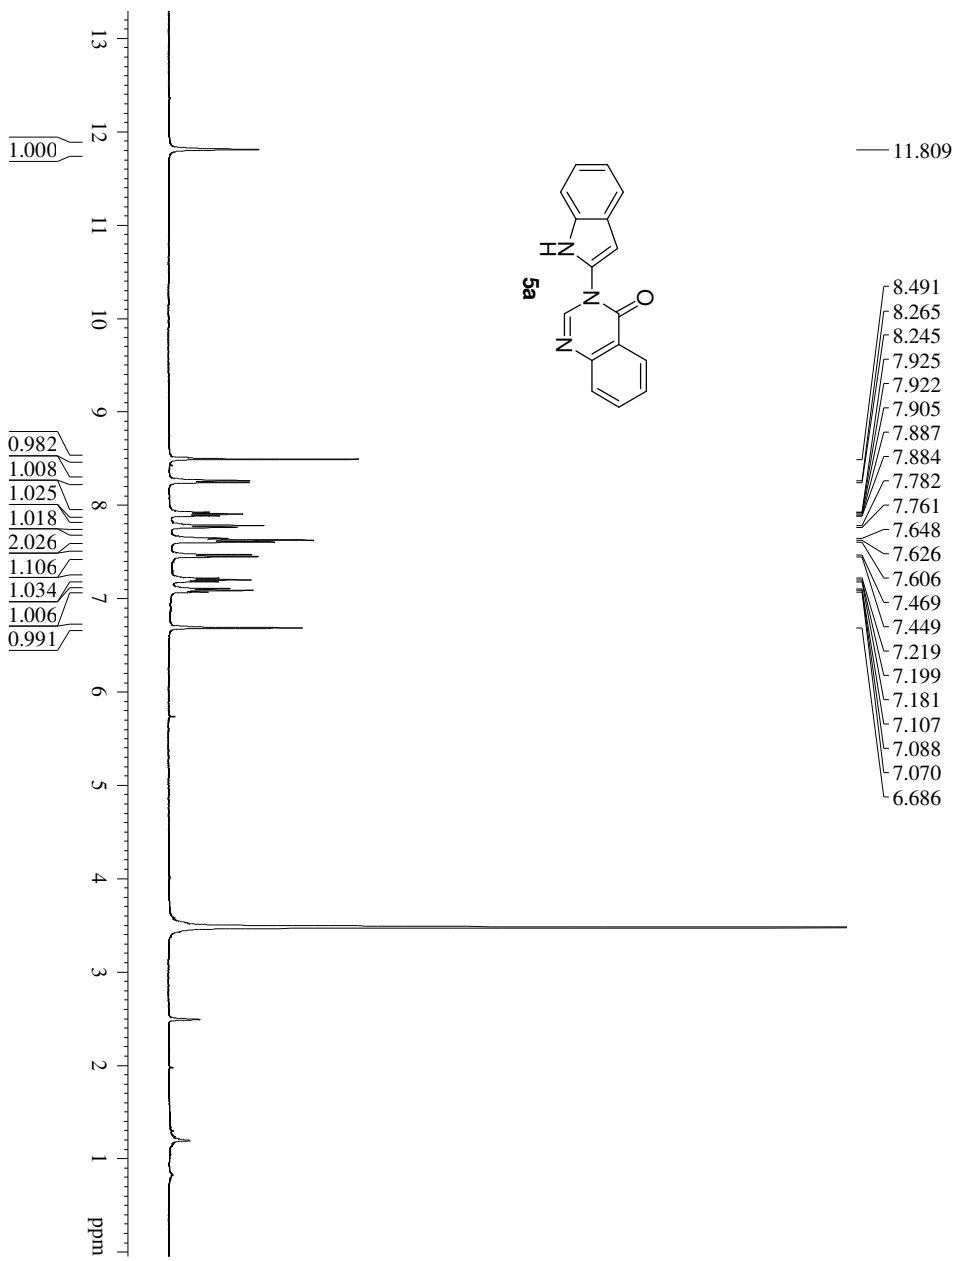



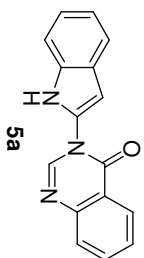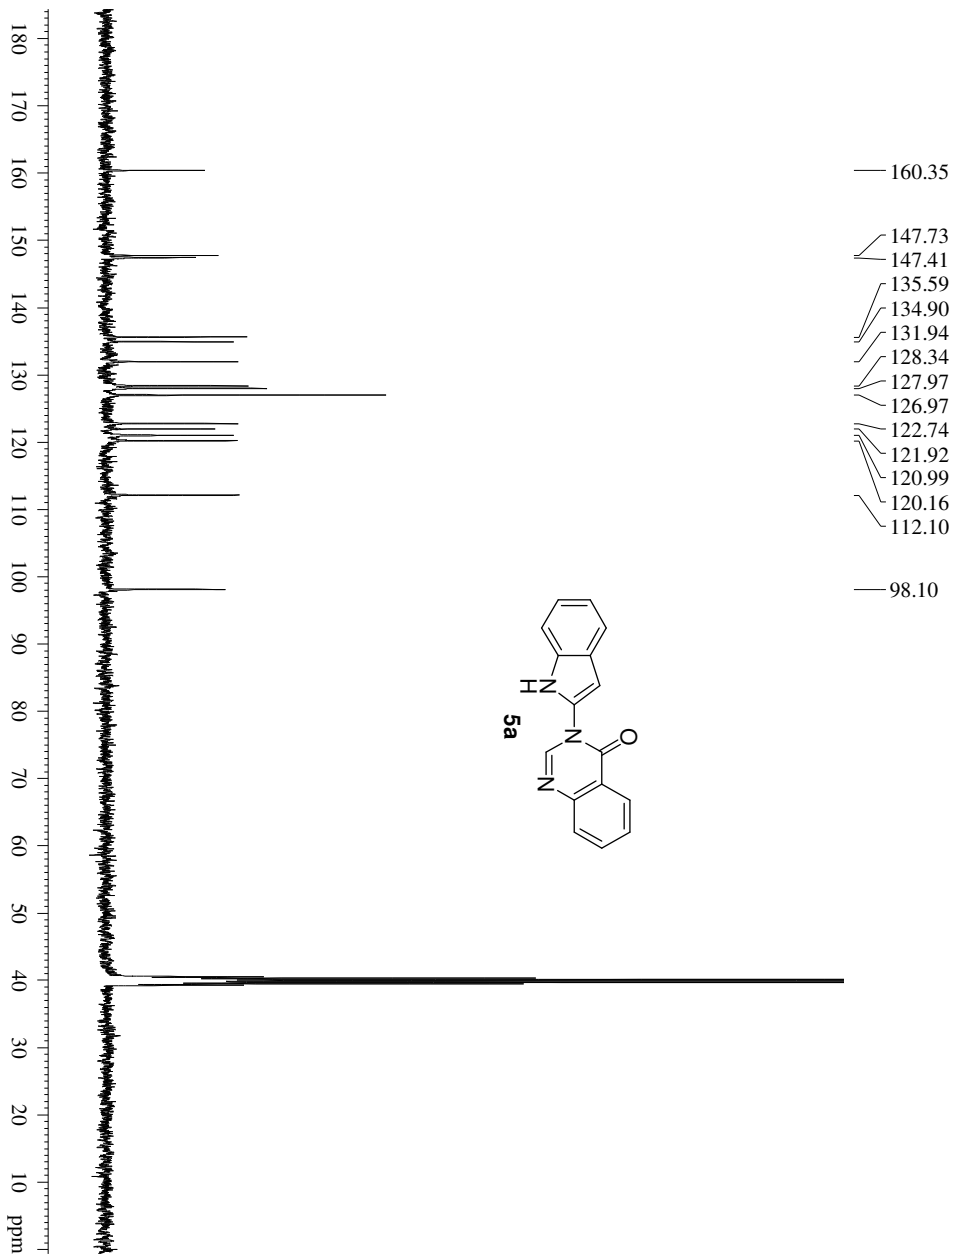

# BRUKER MAXIS HRMS REPORT

School of Chemistry  
University of Hyderabad

## Analysis Info

Analysis Name D:\Data\2013\Dr.NAGARAJANMAY\SKG-191.d  
Method tune\_low\_Pos.m  
Sample Name SKG-191-DCM-MEOH  
Comment

Acquisition Date 5/27/2013 5:00:43 PM

Operator Ramu Sridhar  
Instrument maXis 10138

## Acquisition Parameter

|             |            |                       |           |                  |           |
|-------------|------------|-----------------------|-----------|------------------|-----------|
| Source Type | ESI        | Ion Polarity          | Positive  | Set Nebulizer    | 4.4 psi   |
| Focus       | Not active | Set Capillary         | 4400 V    | Set Dry Heater   | 180 °C    |
| Scan Begin  | 50 m/z     | Set End Plate Offset  | -500 V    | Set Dry Gas      | 4.0 l/min |
| Scan End    | 1500 m/z   | Set Collision Cell RF | 350.0 Vpp | Set Divert Valve | Waste     |

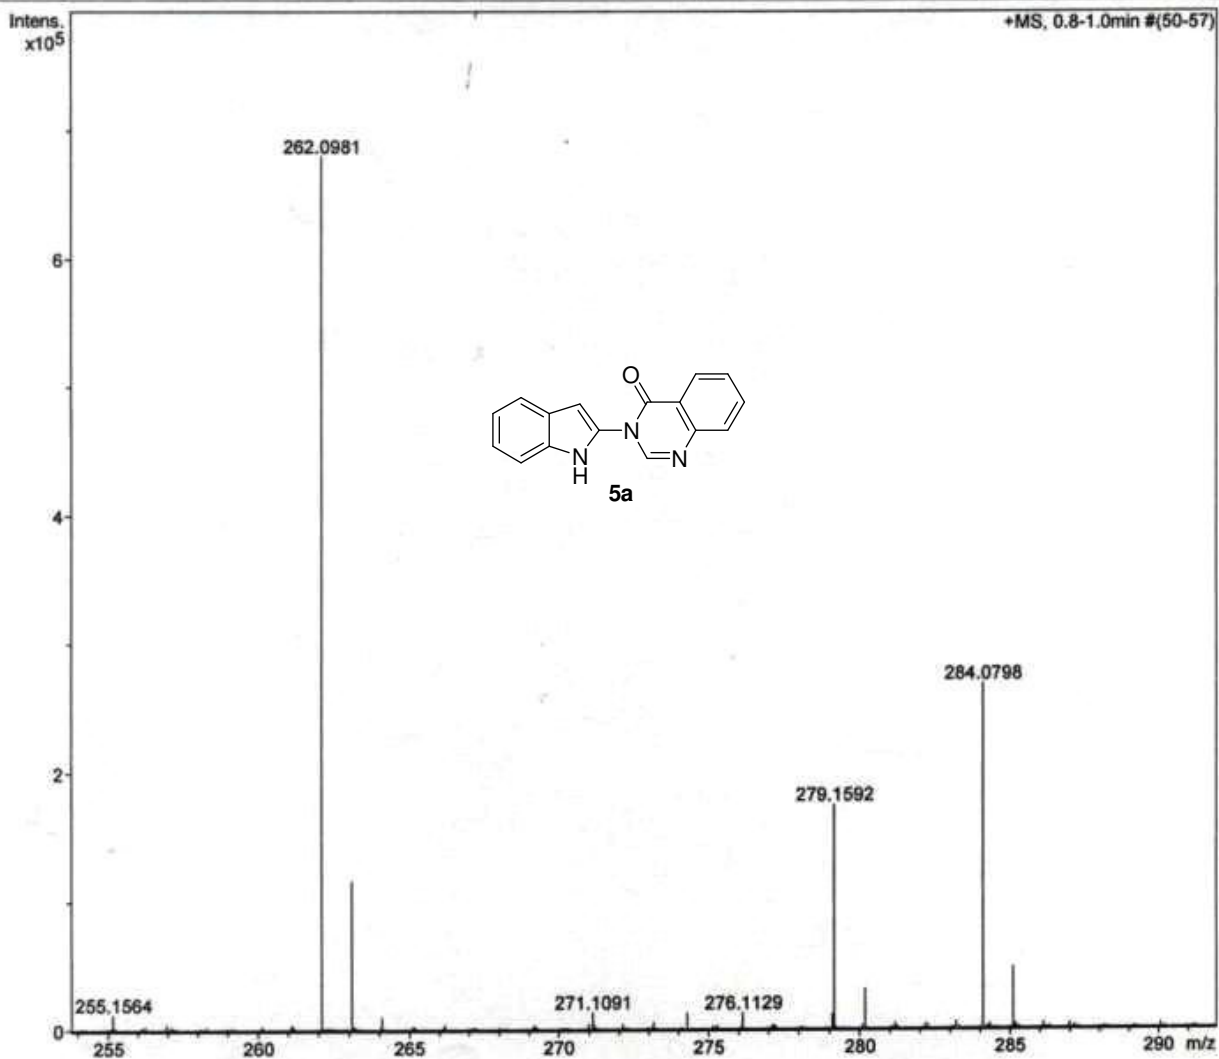

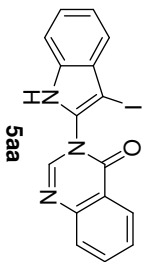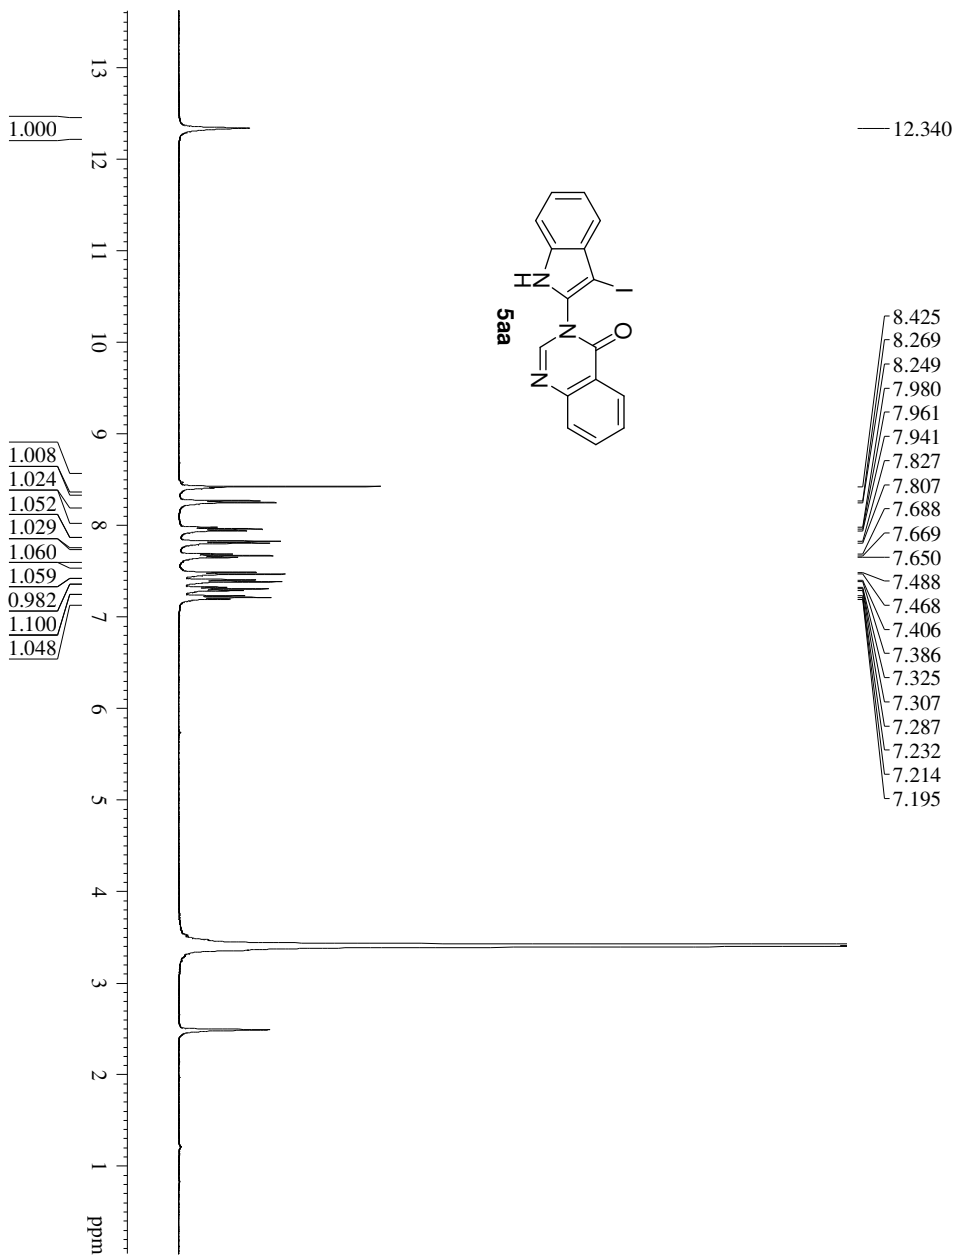

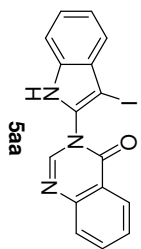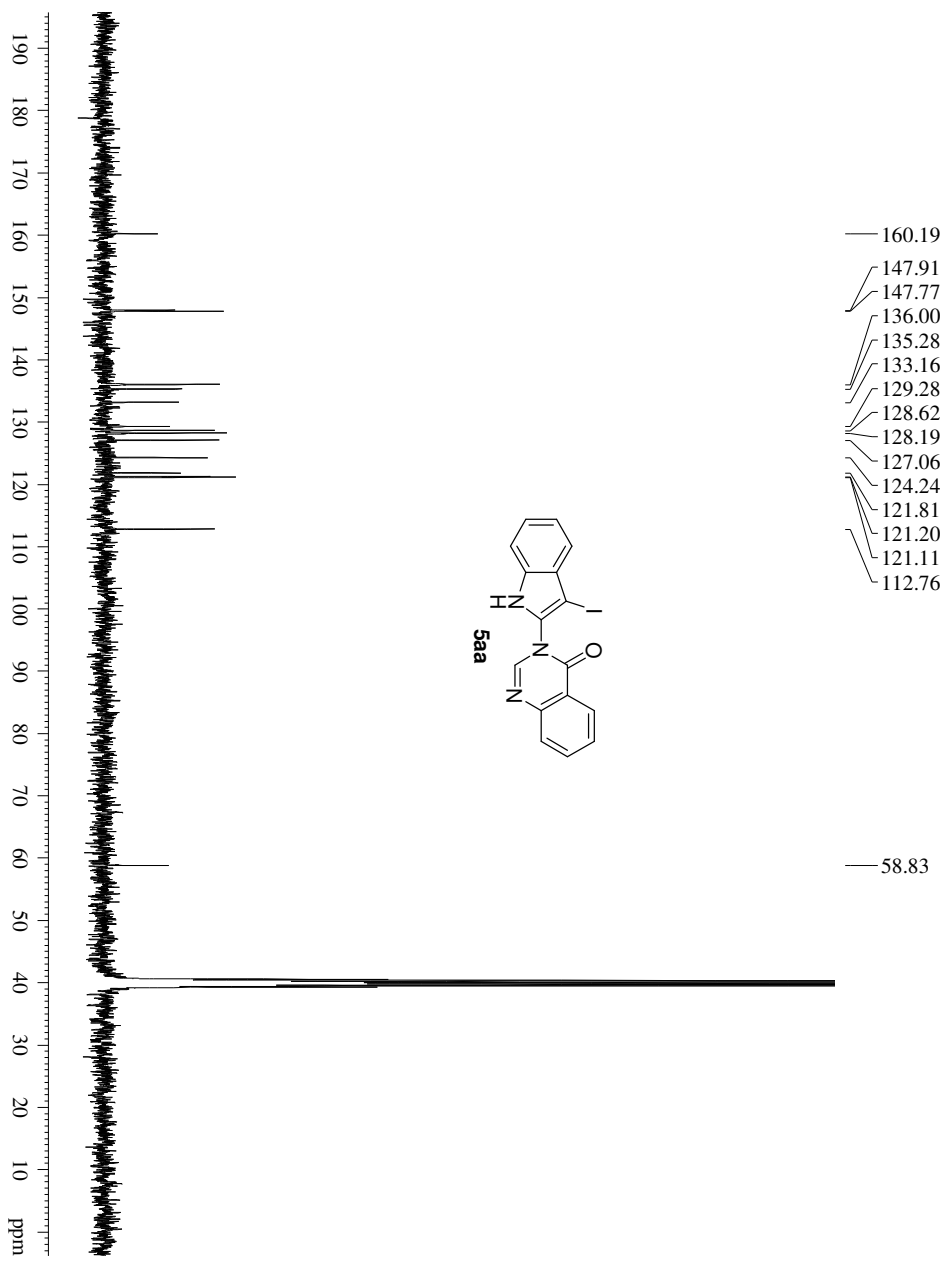

# BRUKER MAXIS HRMS REPORT

School of Chemistry  
University of Hyderabad

## Analysis Info

Analysis Name D:\Data\2013\Dr.NAGARAJAN\JULY\SKG-127..d  
Method tune\_low\_Pos.m  
Sample Name SKG-127--DCM-MEOH  
Comment

Acquisition Date 7/29/2013 11:21:49 AM

Operator Ramu Sridhar  
Instrument maXis 10138

## Acquisition Parameter

|             |            |                       |           |                  |           |
|-------------|------------|-----------------------|-----------|------------------|-----------|
| Source Type | ESI        | Ion Polarity          | Positive  | Set Nebulizer    | 4.4 psi   |
| Focus       | Not active | Set Capillary         | 3800 V    | Set Dry Heater   | 180 °C    |
| Scan Begin  | 50 m/z     | Set End Plate Offset  | -500 V    | Set Dry Gas      | 4.0 l/min |
| Scan End    | 1500 m/z   | Set Collision Cell RF | 350.0 Vpp | Set Divert Valve | Waste     |

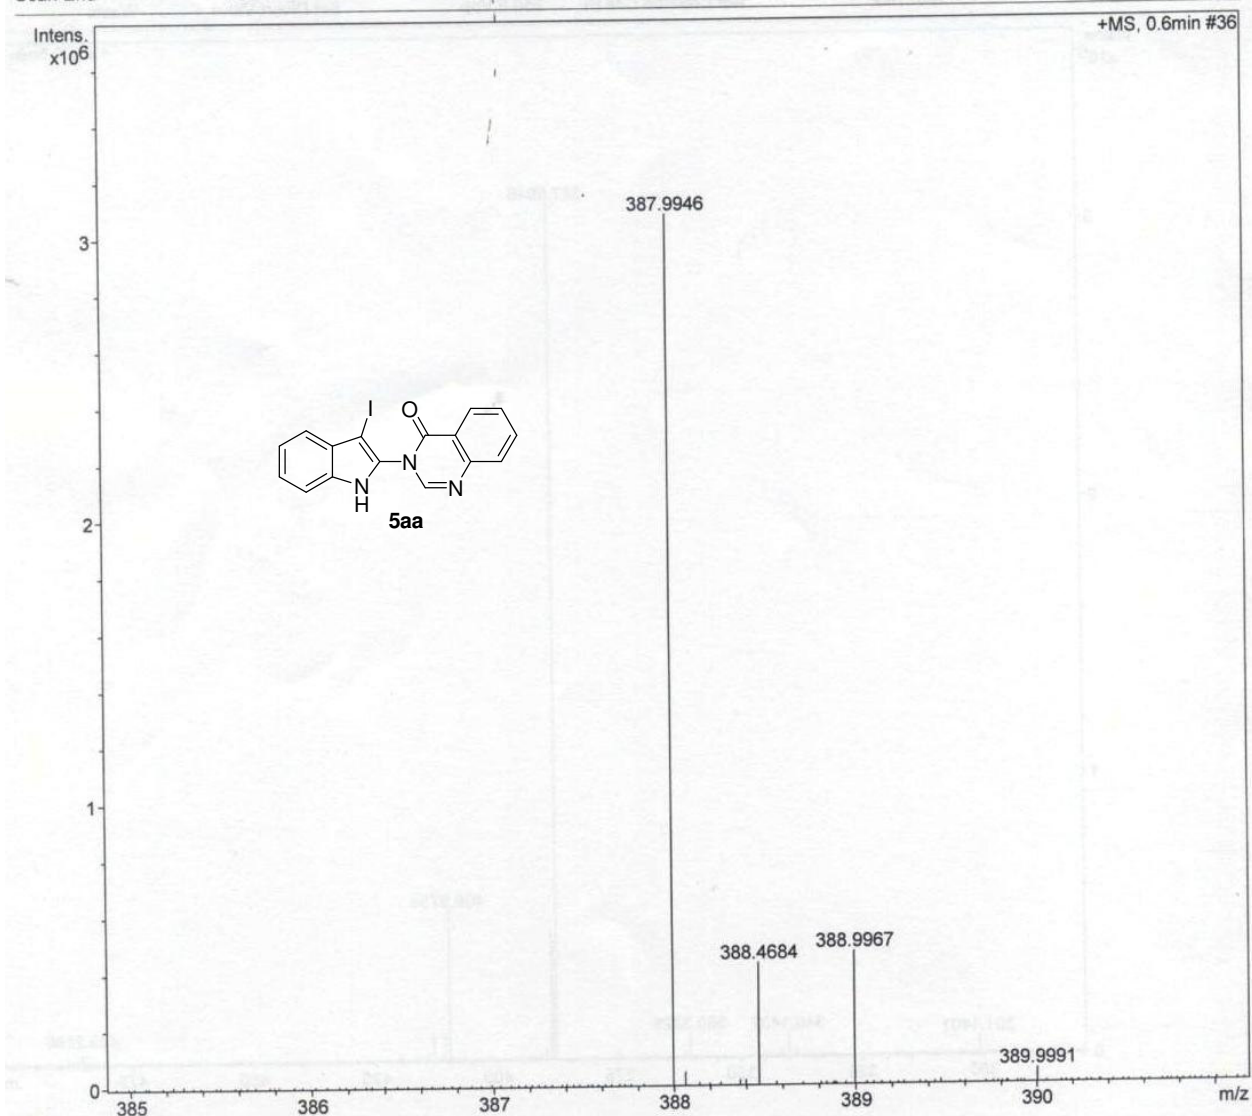

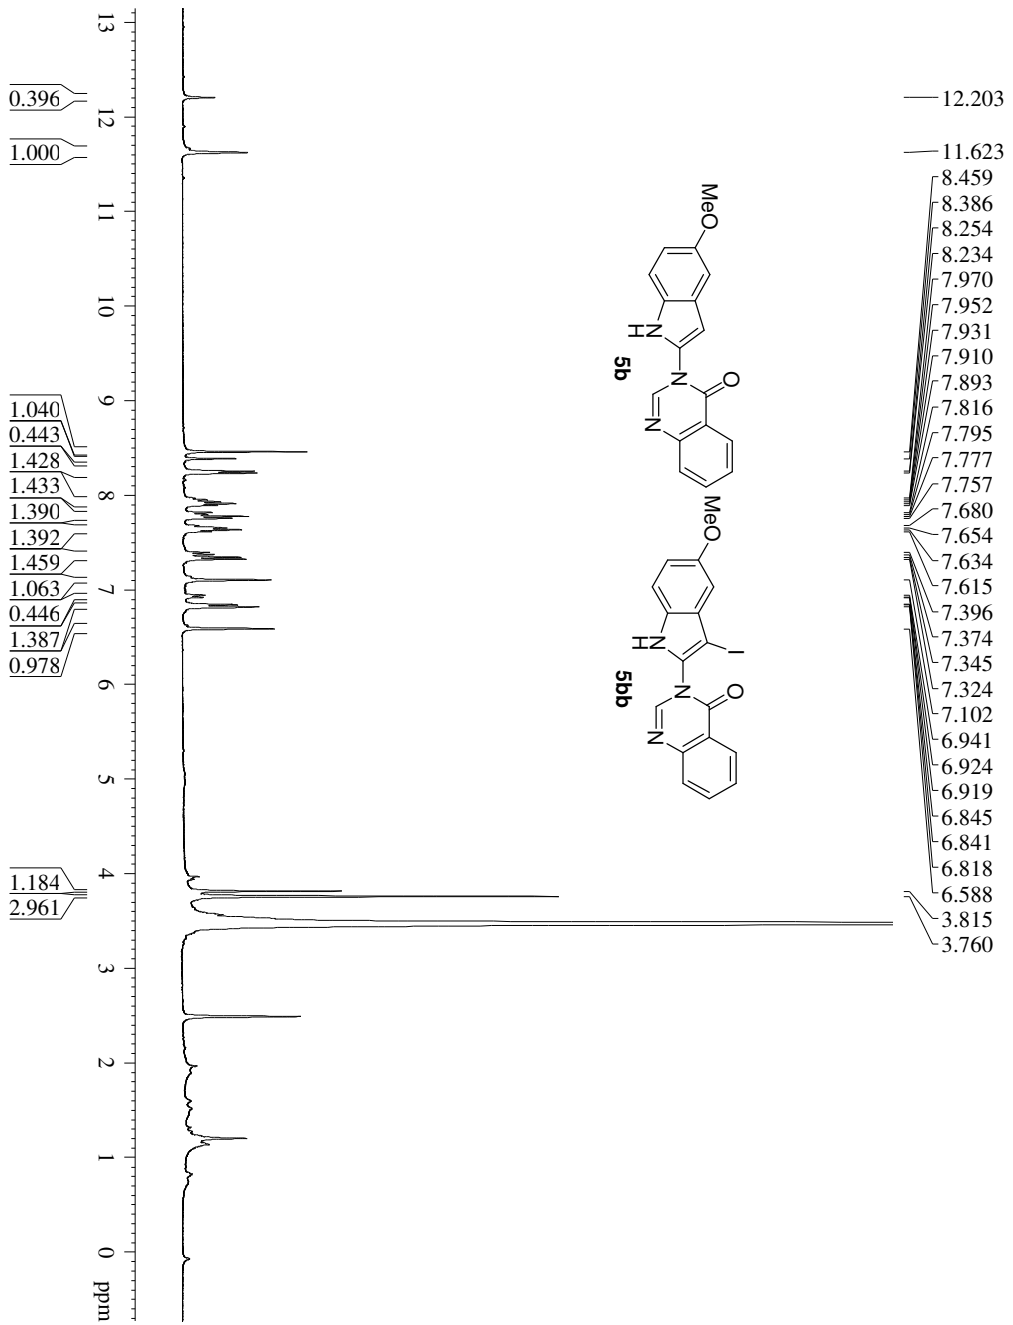

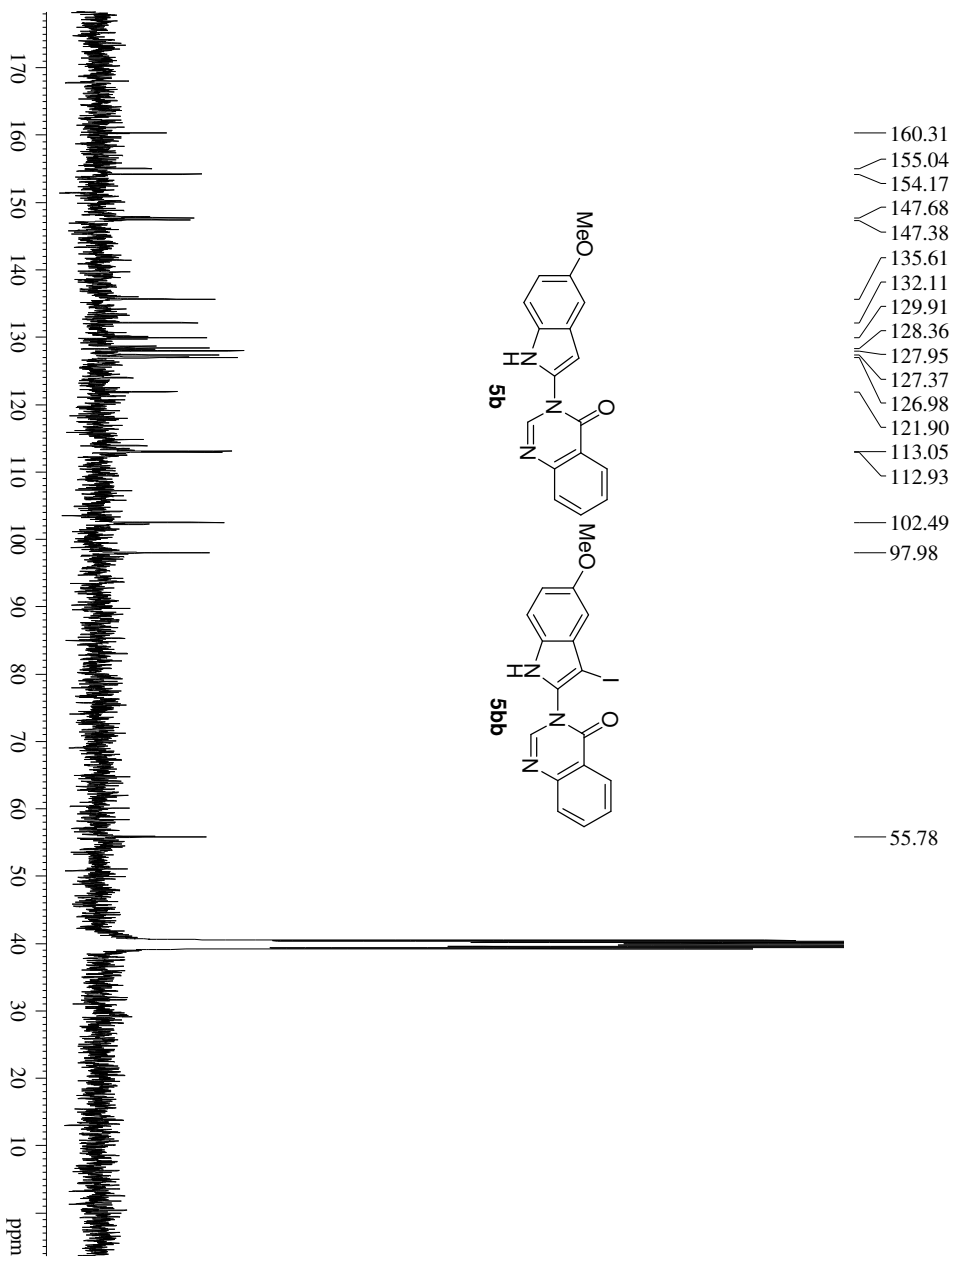

# BRUKER MAXIS HRMS REPORT

School of Chemistry  
University of Hyderabad

## Analysis Info

Analysis Name D:\Data\2013\Dr.NAGARAJANMAY\SKG-133.d  
Method tune\_low.m  
Sample Name SKG-133-DCM-MEOH  
Comment

Acquisition Date 5/28/2013 3:55:37 PM

Operator Ramu Sridhar  
Instrument maXis 10138

## Acquisition Parameter

|             |            |                       |           |                  |           |
|-------------|------------|-----------------------|-----------|------------------|-----------|
| Source Type | ESI        | Ion Polarity          | Positive  | Set Nebulizer    | 4.4 psi   |
| Focus       | Not active | Set Capillary         | 3500 V    | Set Dry Heater   | 200 °C    |
| Scan Begin  | 50 m/z     | Set End Plate Offset  | -500 V    | Set Dry Gas      | 4.0 l/min |
| Scan End    | 1800 m/z   | Set Collision Cell RF | 350.0 Vpp | Set Divert Valve | Waste     |

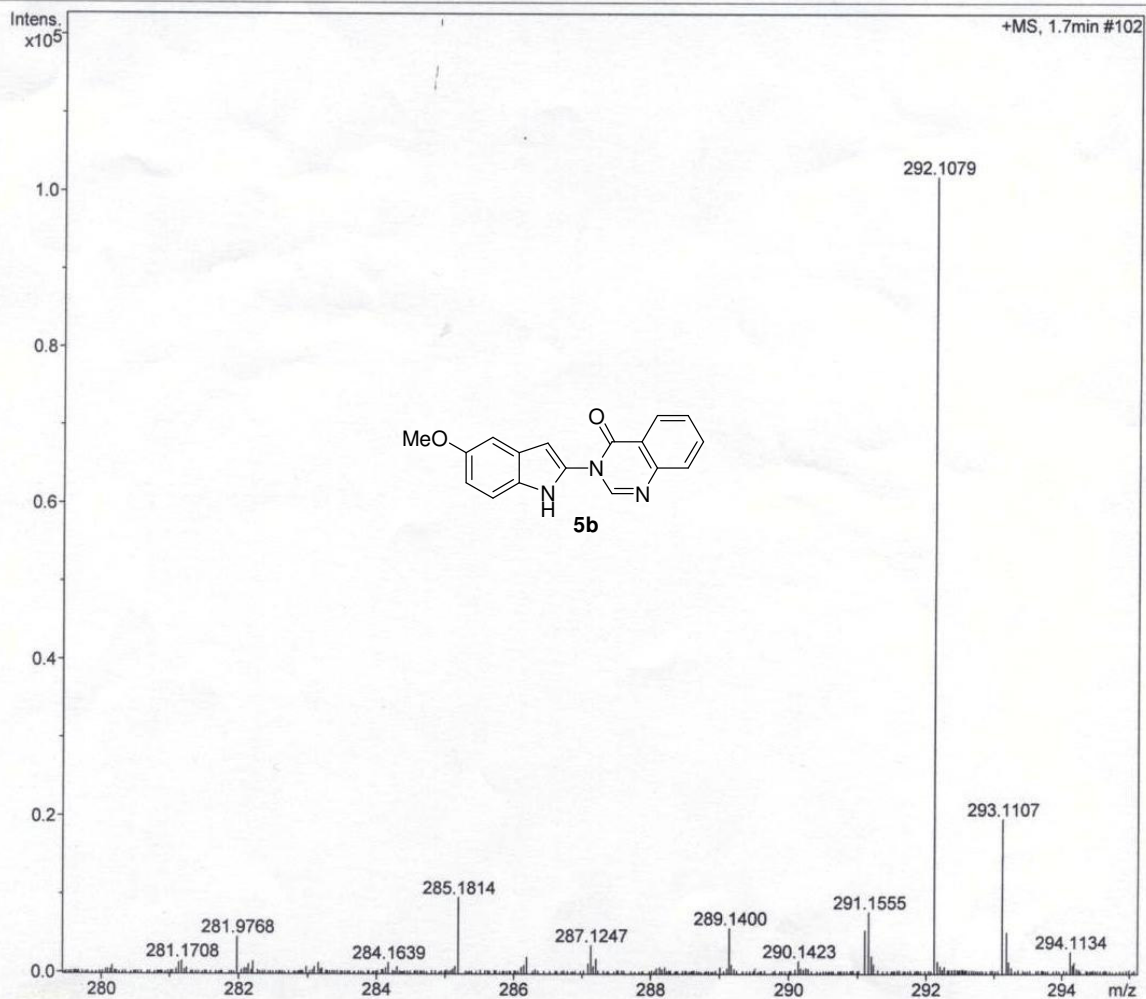



# BRUKER MAXIS HRMS REPORT

School of Chemistry  
University of Hyderabad

## Analysis Info

Analysis Name D:\Data\2013\Dr.NAGARAJANMAYSKG-133.d  
Method tune\_low.m  
Sample Name SKG-133-DCM-MEOH  
Comment

Acquisition Date 5/28/2013 3:55:37 PM

Operator Ramu Sridhar  
Instrument maXis 10138

## Acquisition Parameter

|             |            |                       |           |                  |           |
|-------------|------------|-----------------------|-----------|------------------|-----------|
| Source Type | ESI        | Ion Polarity          | Positive  | Set Nebulizer    | 4.4 psi   |
| Focus       | Not active | Set Capillary         | 3500 V    | Set Dry Heater   | 200 °C    |
| Scan Begin  | 50 m/z     | Set End Plate Offset  | -500 V    | Set Dry Gas      | 4.0 l/min |
| Scan End    | 1800 m/z   | Set Collision Cell RF | 350.0 Vpp | Set Divert Valve | Waste     |

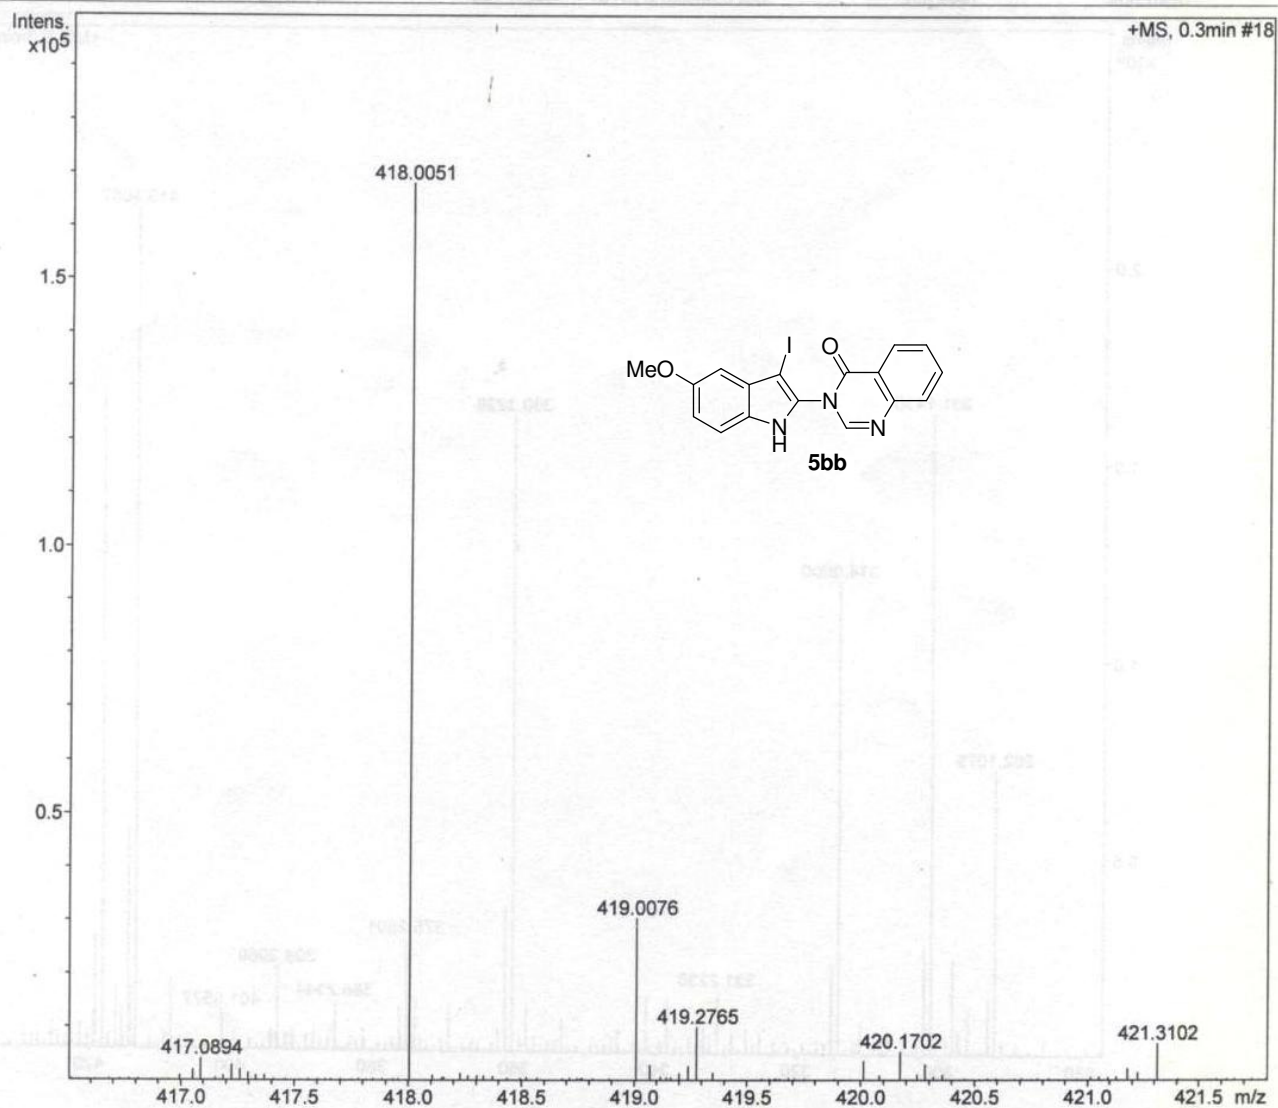

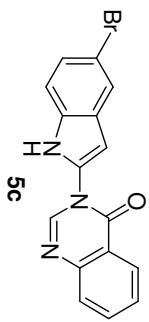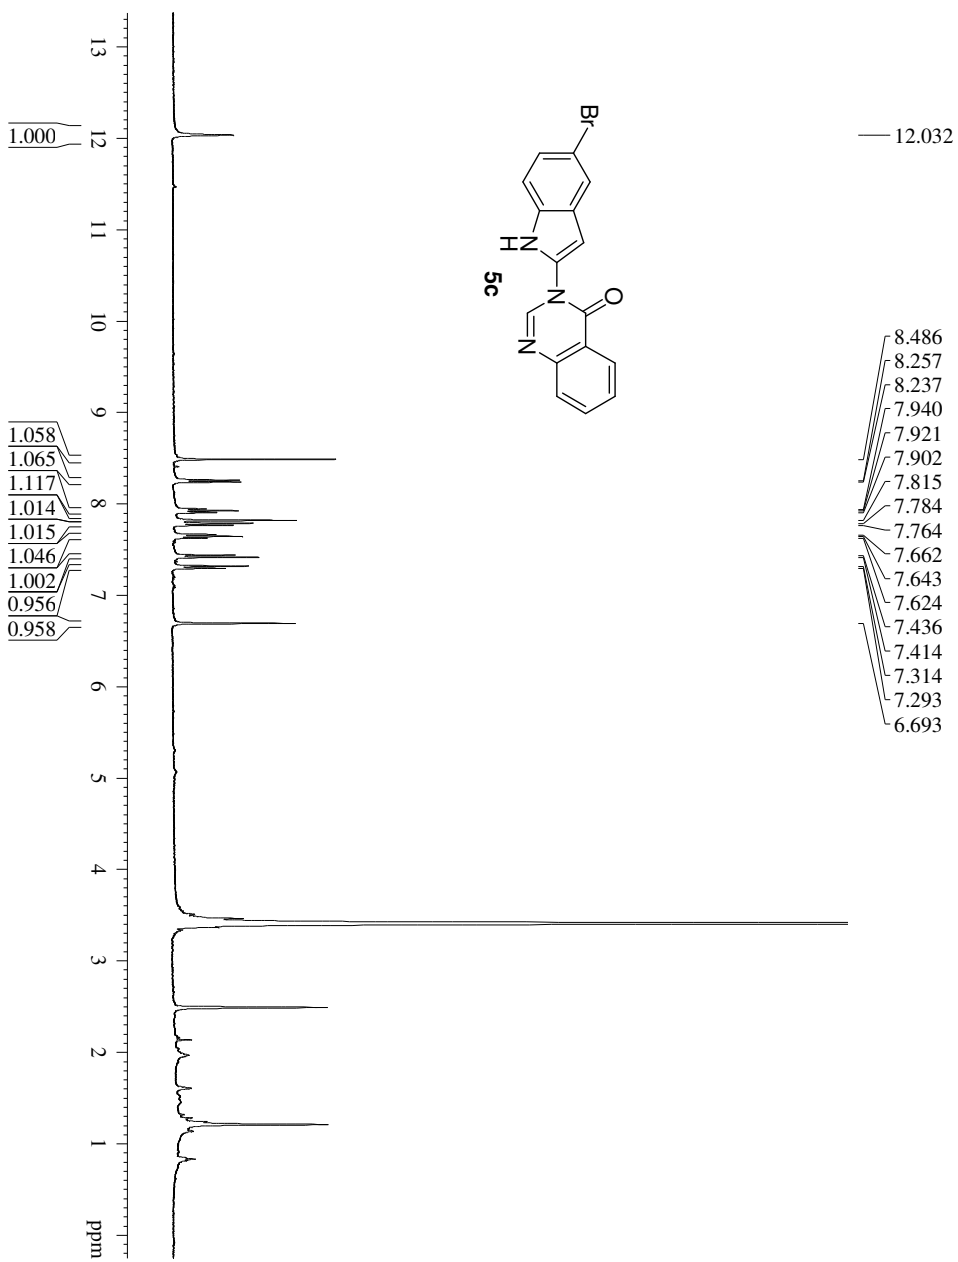

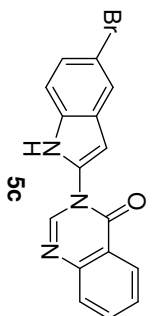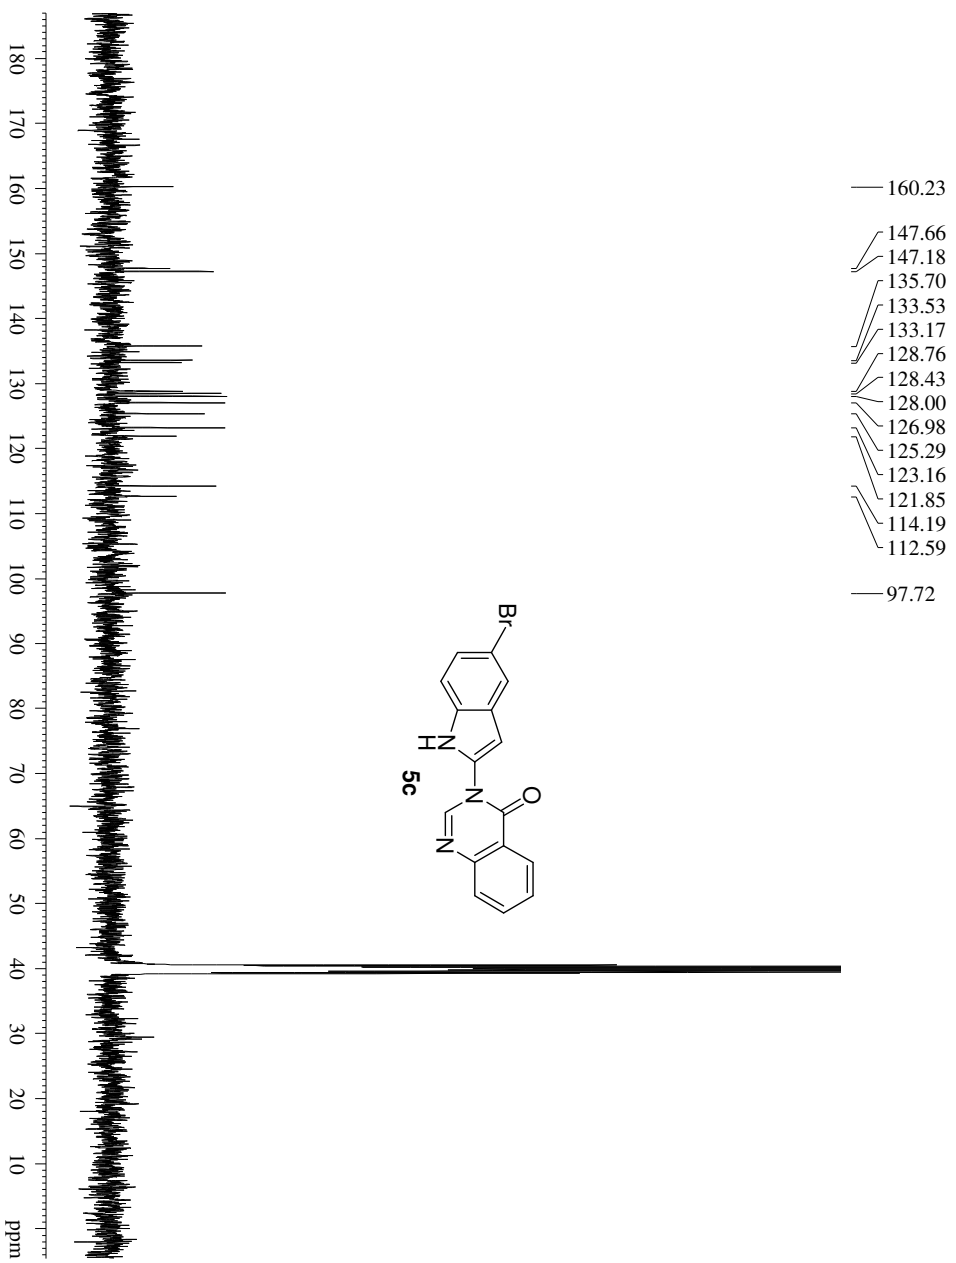

# BRUKER MAXIS HRMS REPORT

School of Chemistry  
University of Hyderabad

## Analysis Info

Analysis Name D:\Data\2013\Dr.NAGARAJAN\MAY\SKG-132-I.d  
Method tune\_low.m  
Sample Name SKG-132-I-DCM-MEOH  
Comment

Acquisition Date 5/28/2013 4:10:46 PM

Operator Ramu Sridhar  
Instrument maXis 10138

## Acquisition Parameter

|             |            |                       |           |                  |           |
|-------------|------------|-----------------------|-----------|------------------|-----------|
| Source Type | ESI        | Ion Polarity          | Positive  | Set Nebulizer    | 4.4 psi   |
| Focus       | Not active | Set Capillary         | 3500 V    | Set Dry Heater   | 200 °C    |
| Scan Begin  | 50 m/z     | Set End Plate Offset  | -500 V    | Set Dry Gas      | 4.0 l/min |
| Scan End    | 1800 m/z   | Set Collision Cell RF | 350.0 Vpp | Set Divert Valve | Waste     |

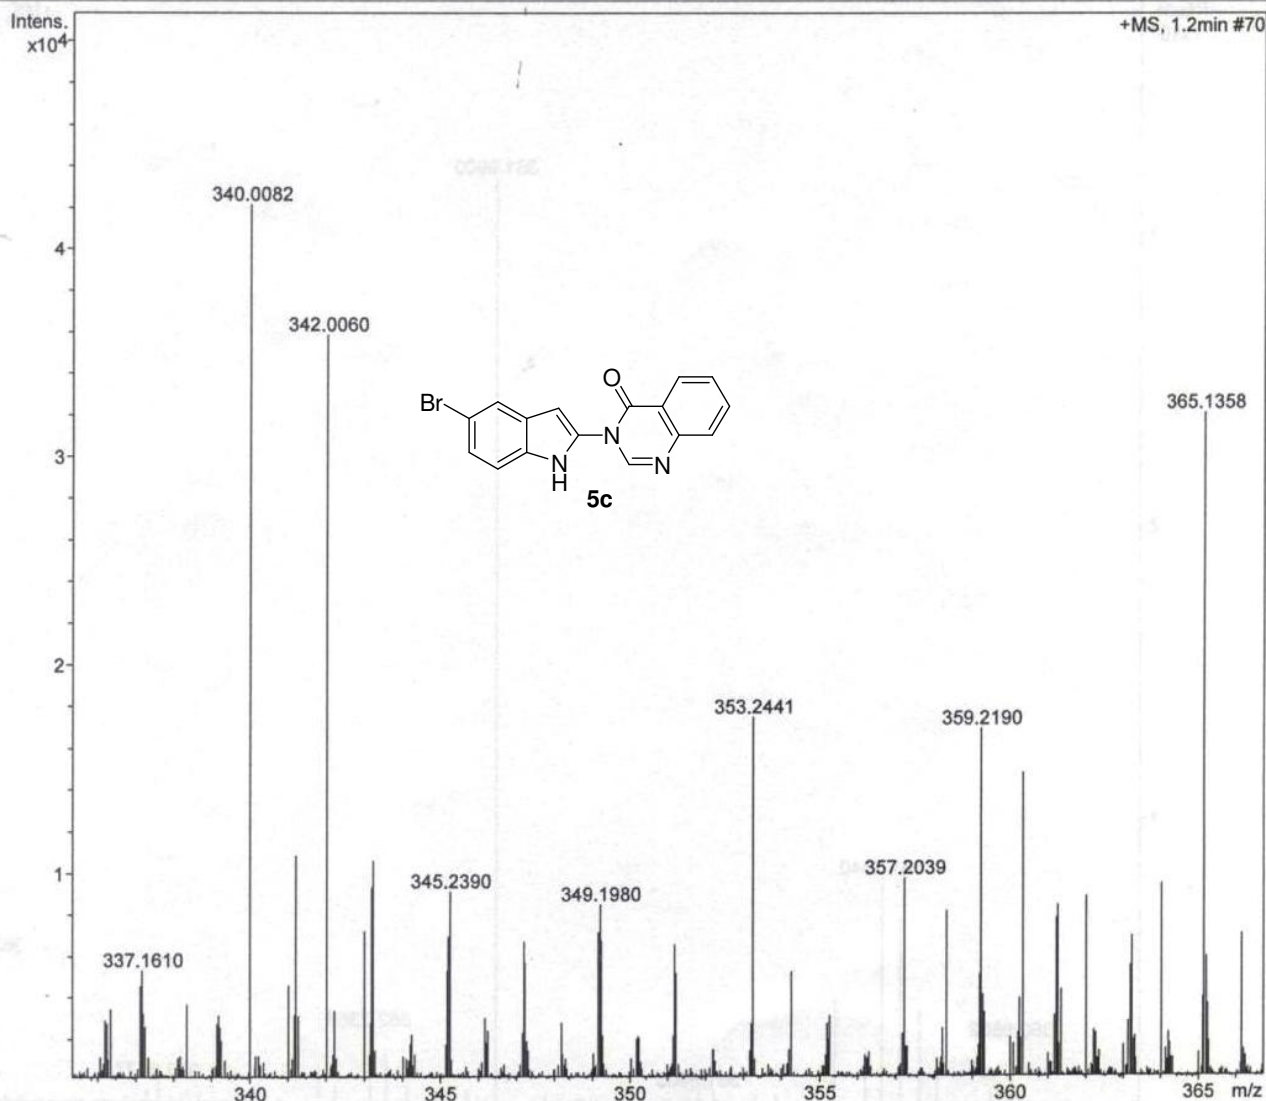

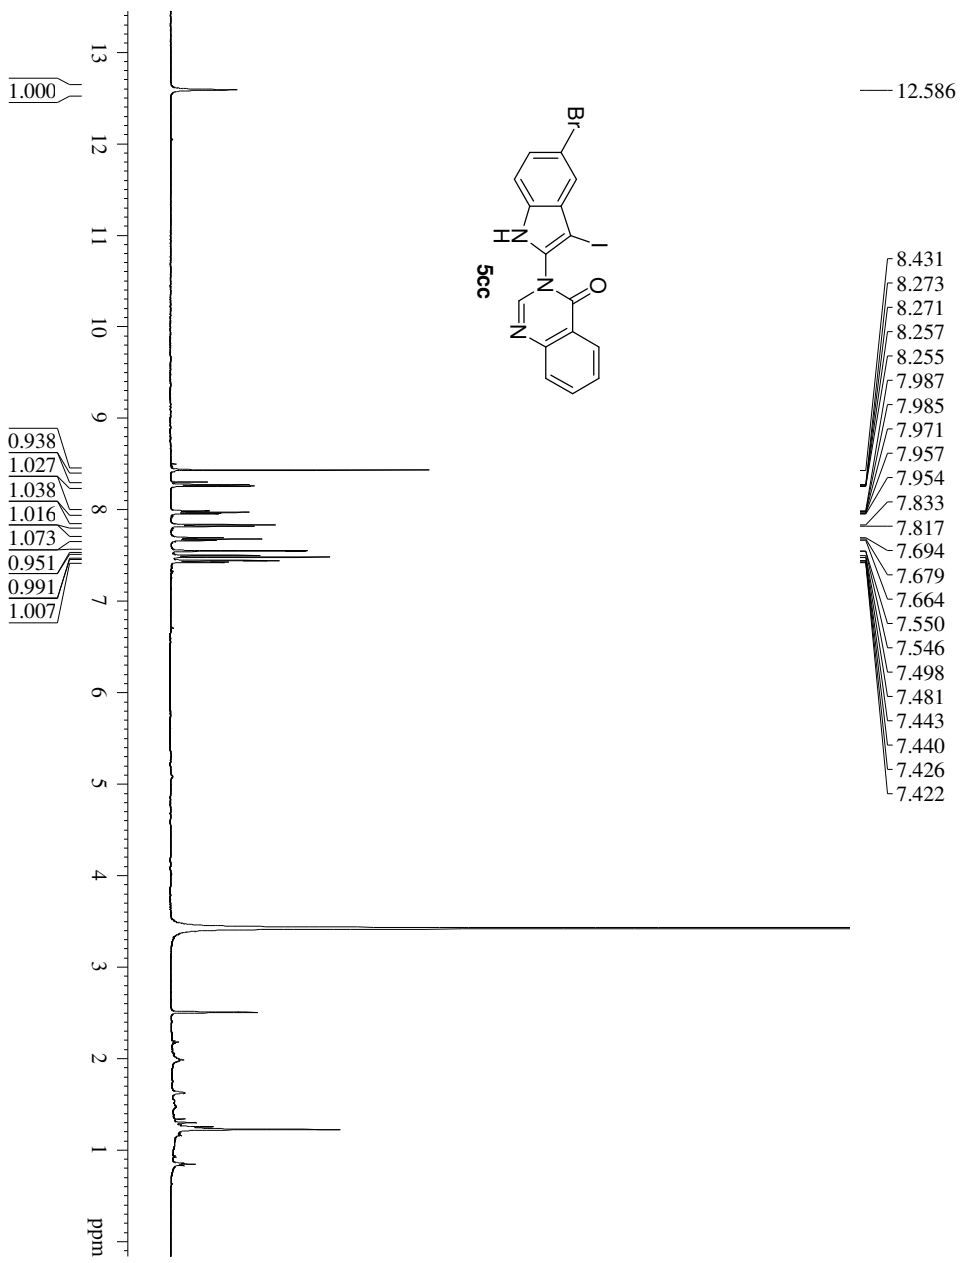

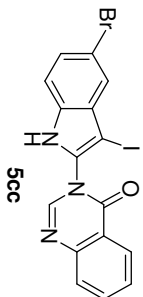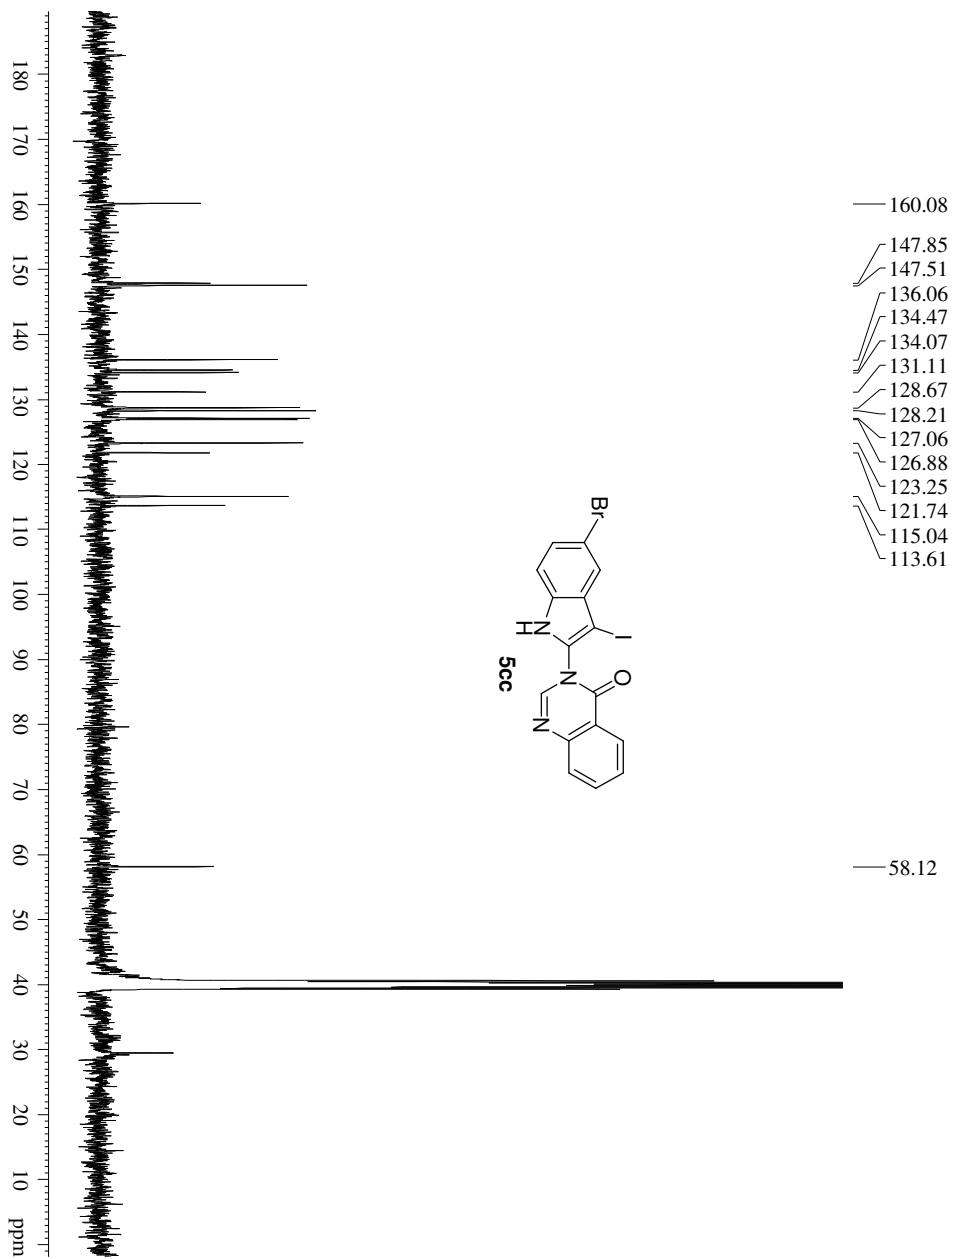

# BRUKER MAXIS HRMS REPORT

School of Chemistry  
University of Hyderabad

## Analysis Info

Analysis Name D:\Data\2013\Dr.NAGARAJANMAY\SKG-132-II.d  
Method tune\_low.m  
Sample Name SKG-132-II-DCM-MEOH  
Comment

Acquisition Date 5/28/2013 4:23:44 PM

Operator Ramu Sridhar  
Instrument maXis 10138

## Acquisition Parameter

|             |            |                       |           |                  |           |
|-------------|------------|-----------------------|-----------|------------------|-----------|
| Source Type | ESI        | Ion Polarity          | Positive  | Set Nebulizer    | 4.4 psi   |
| Focus       | Not active | Set Capillary         | 3500 V    | Set Dry Heater   | 200 °C    |
| Scan Begin  | 50 m/z     | Set End Plate Offset  | -500 V    | Set Dry Gas      | 4.0 l/min |
| Scan End    | 1800 m/z   | Set Collision Cell RF | 350.0 Vpp | Set Divert Valve | Waste     |

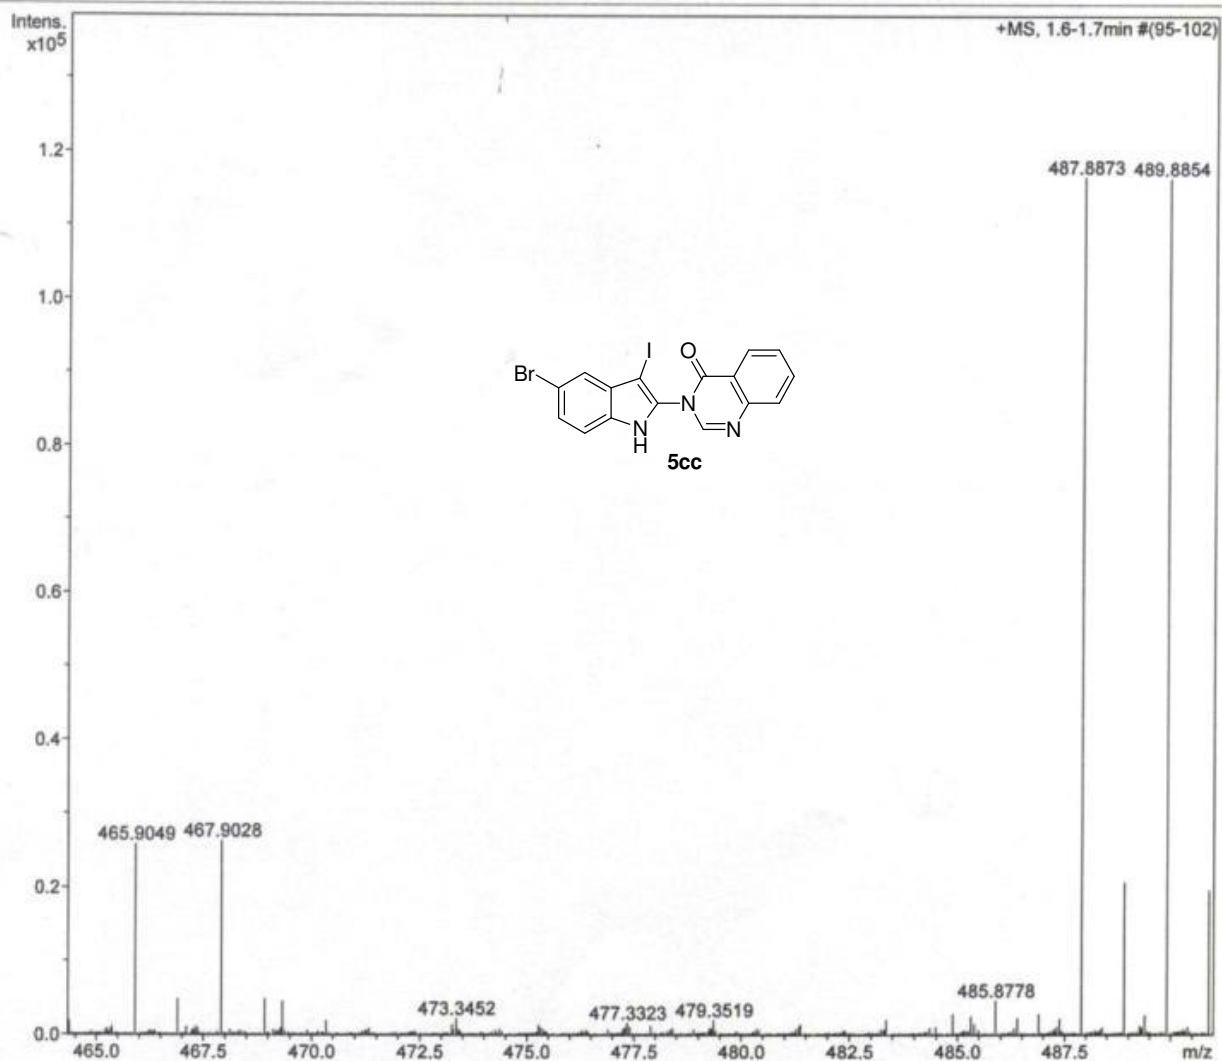

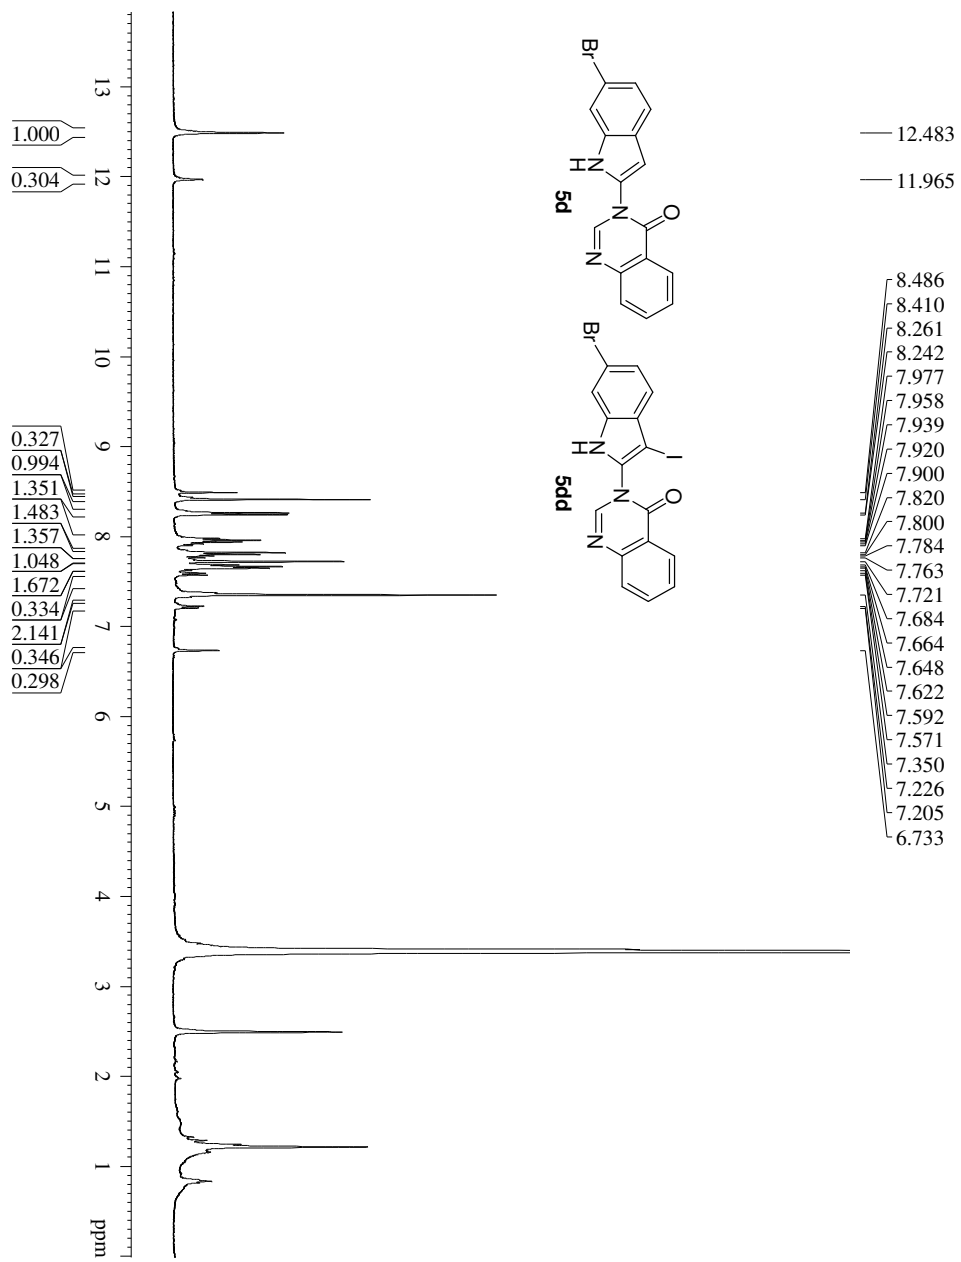



160.10  
147.86  
147.55  
147.19  
136.03  
135.92  
135.67  
134.03  
128.64  
128.43  
128.20  
127.99  
127.05  
125.95  
124.18  
123.00  
121.76  
116.78  
115.27  
114.63  
98.17

59.15

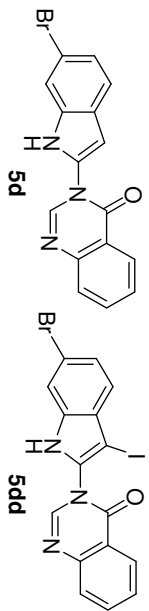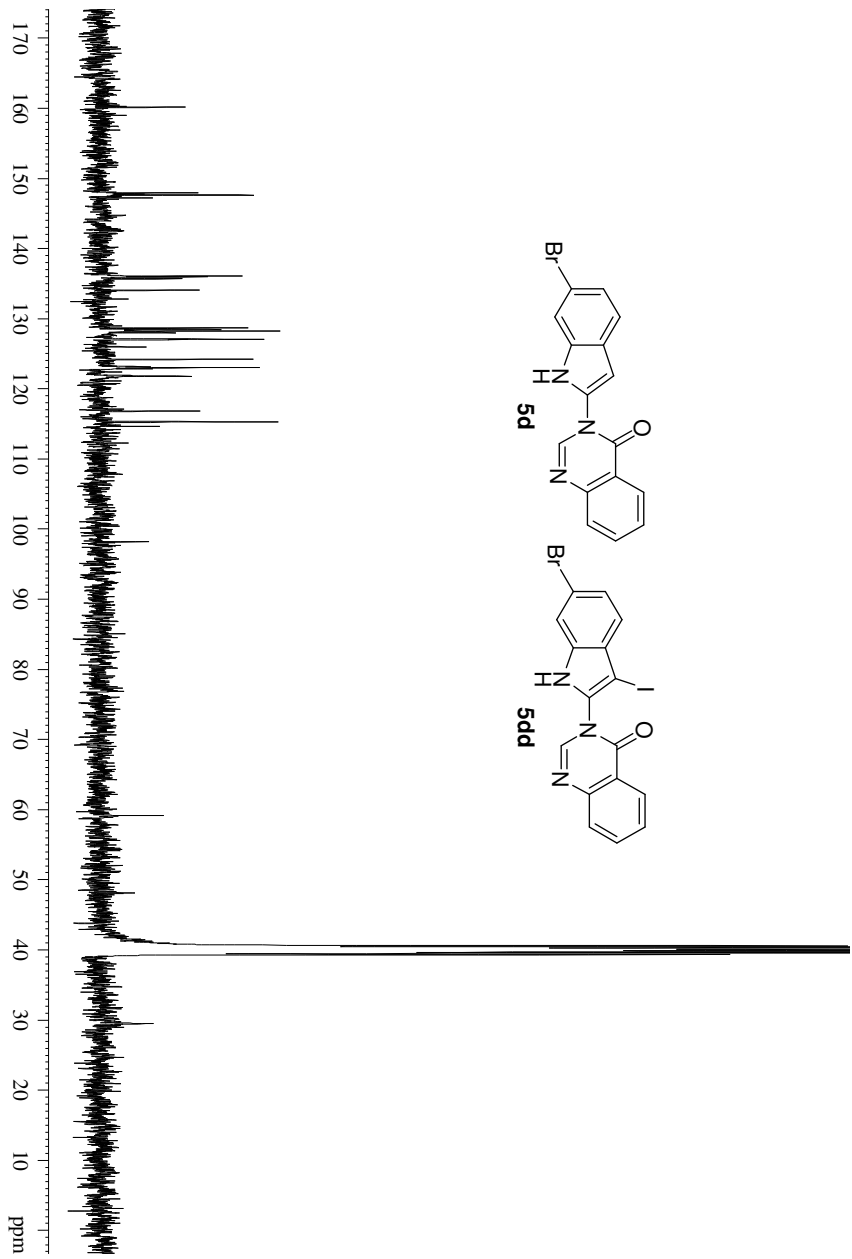

# BRUKER MAXIS HRMS REPORT

School of Chemistry  
University of Hyderabad

## Analysis Info

Analysis Name D:\Data\2013\Dr.NAGARAJANMAY\SKG-177R.d  
Method tune\_low.m  
Sample Name SKG-177-DCM-MEOH  
Comment

Acquisition Date 5/28/2013 4:49:06 PM

Operator Ramu Sridhar  
Instrument maXis 10138

## Acquisition Parameter

|             |            |                       |           |                  |           |
|-------------|------------|-----------------------|-----------|------------------|-----------|
| Source Type | ESI        | Ion Polarity          | Positive  | Set Nebulizer    | 4.4 psi   |
| Focus       | Not active | Set Capillary         | 3500 V    | Set Dry Heater   | 200 °C    |
| Scan Begin  | 50 m/z     | Set End Plate Offset  | -500 V    | Set Dry Gas      | 4.0 l/min |
| Scan End    | 1800 m/z   | Set Collision Cell RF | 350.0 Vpp | Set Divert Valve | Waste     |

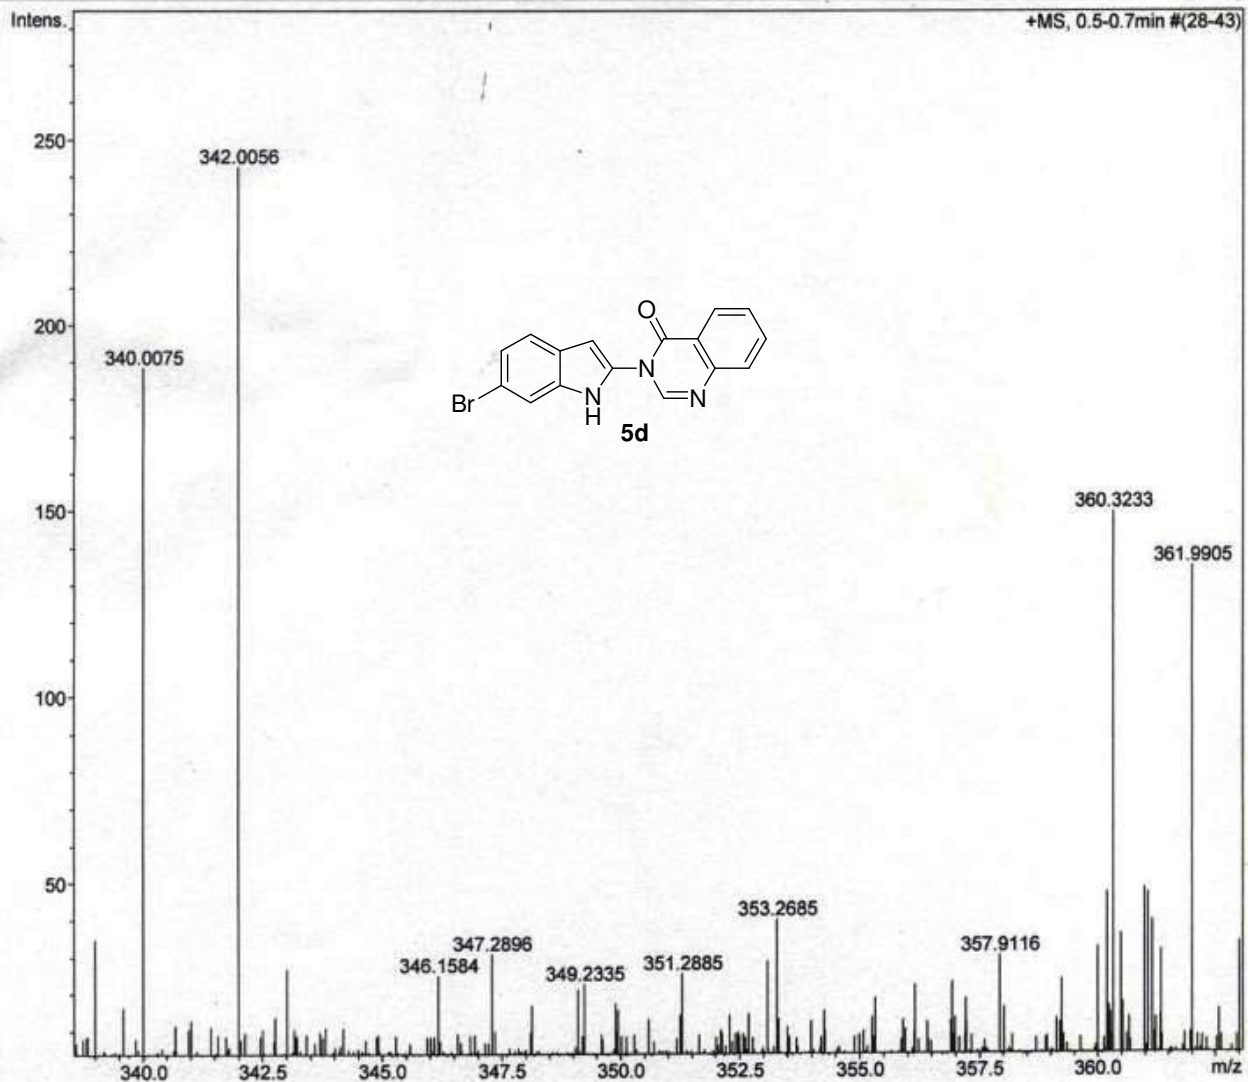

# BRUKER MAXIS HRMS REPORT

School of Chemistry  
University of Hyderabad

## Analysis Info

Analysis Name D:\Data\2013\Dr.NAGARAJANMAY\SKG-177R.d  
Method tune\_low.m  
Sample Name SKG-177-DCM-MEOH  
Comment

Acquisition Date 5/28/2013 4:49:06 PM

Operator Ramu Sridhar  
Instrument maXis 10138

## Acquisition Parameter

|             |            |                       |           |                  |           |
|-------------|------------|-----------------------|-----------|------------------|-----------|
| Source Type | ESI        | Ion Polarity          | Positive  | Set Nebulizer    | 4.4 psi   |
| Focus       | Not active | Set Capillary         | 3500 V    | Set Dry Heater   | 200 °C    |
| Scan Begin  | 50 m/z     | Set End Plate Offset  | -500 V    | Set Dry Gas      | 4.0 l/min |
| Scan End    | 1800 m/z   | Set Collision Cell RF | 350.0 Vpp | Set Divert Valve | Waste     |

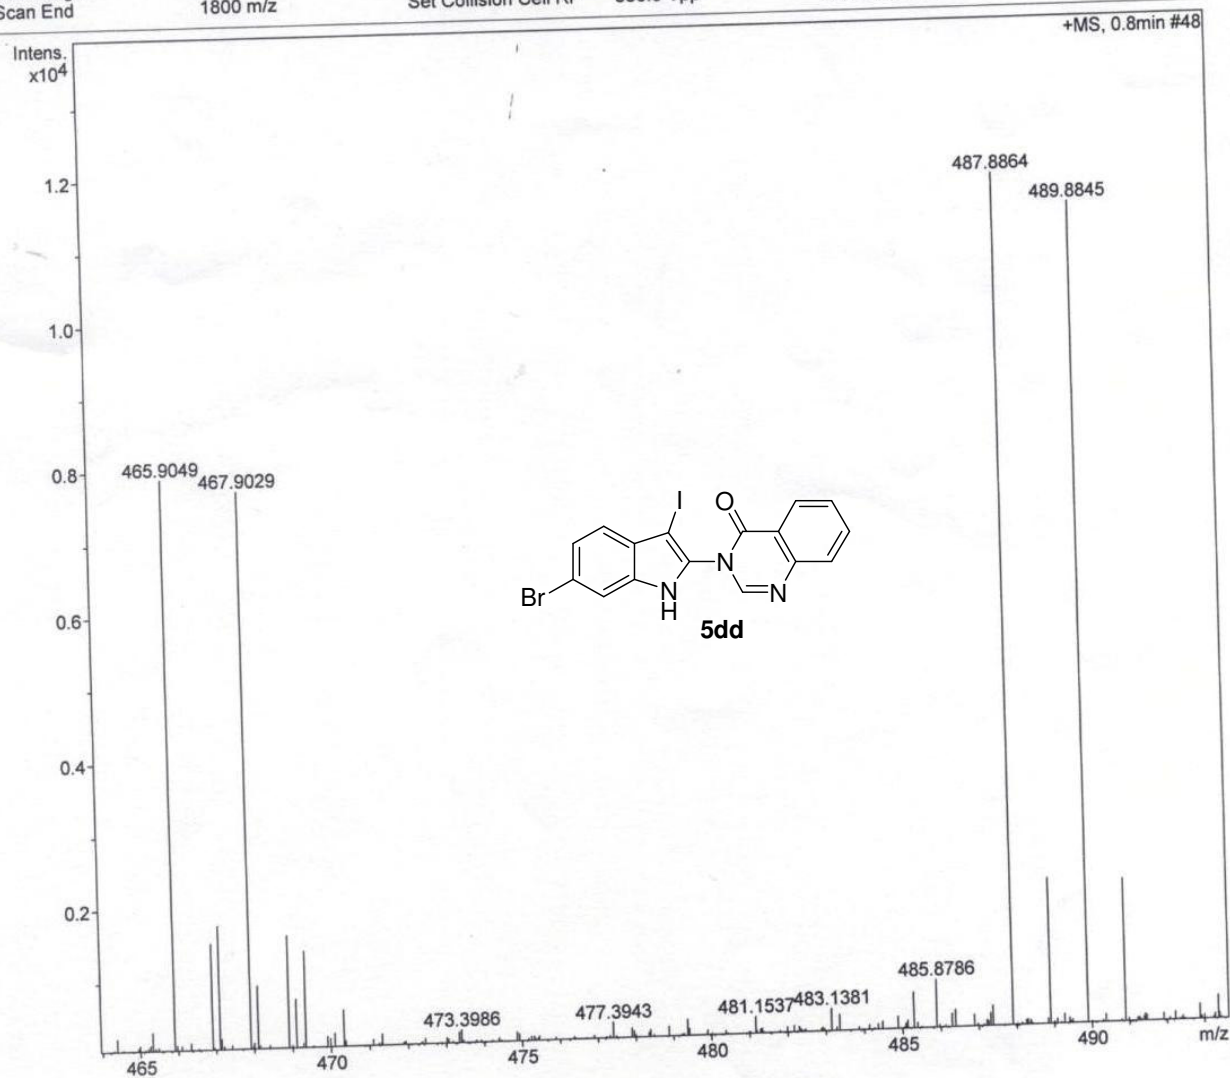

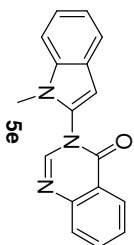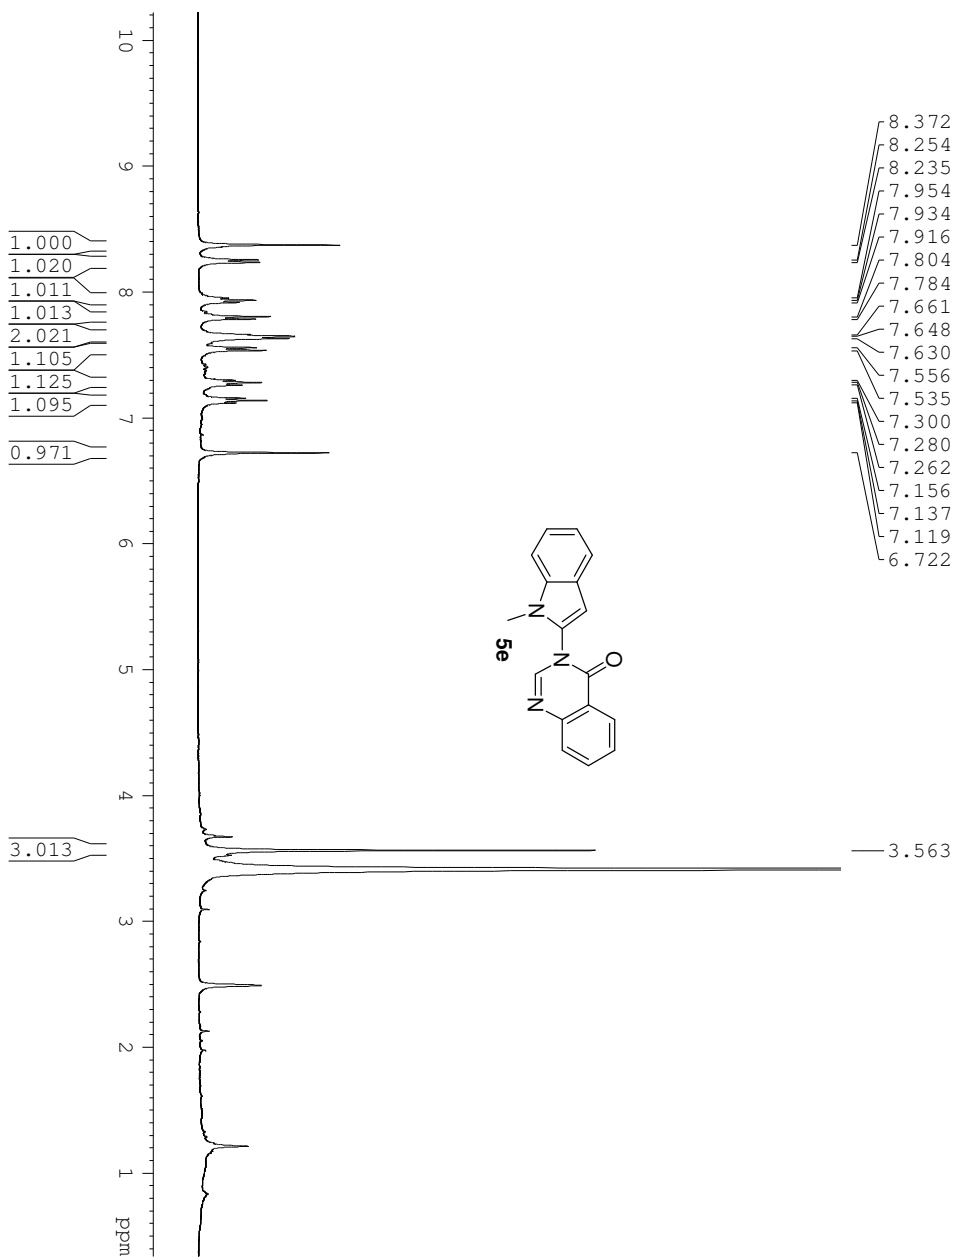

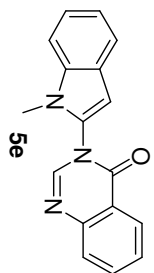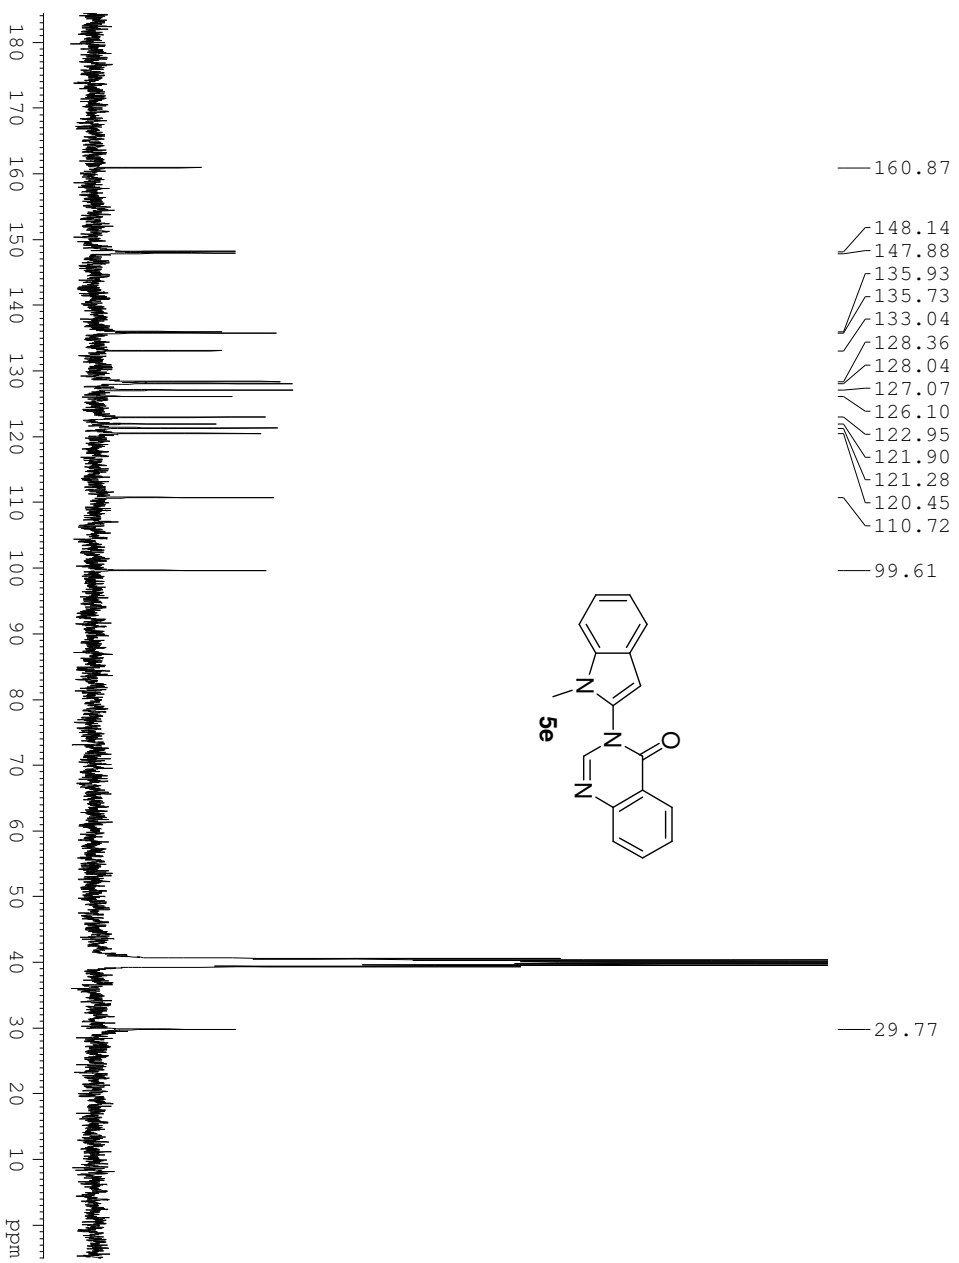

# BRUKER MAXIS HRMS REPORT

School of Chemistry  
University of Hyderabad

## Analysis Info

Analysis Name D:\Data\2013\Dr.NAGARAJANMAY\SKG-137R.d  
Method tune\_low.m  
Sample Name SKG-137-DCM-MEOH  
Comment

Acquisition Date 5/28/2013 3:40:42 PM

Operator Ramu Sridhar  
Instrument maXis 10138

## Acquisition Parameter

|             |            |                       |           |                  |           |
|-------------|------------|-----------------------|-----------|------------------|-----------|
| Source Type | ESI        | Ion Polarity          | Positive  | Set Nebulizer    | 4.4 psi   |
| Focus       | Not active | Set Capillary         | 3500 V    | Set Dry Heater   | 200 °C    |
| Scan Begin  | 50 m/z     | Set End Plate Offset  | -500 V    | Set Dry Gas      | 4.0 l/min |
| Scan End    | 1800 m/z   | Set Collision Cell RF | 350.0 Vpp | Set Divert Valve | Waste     |

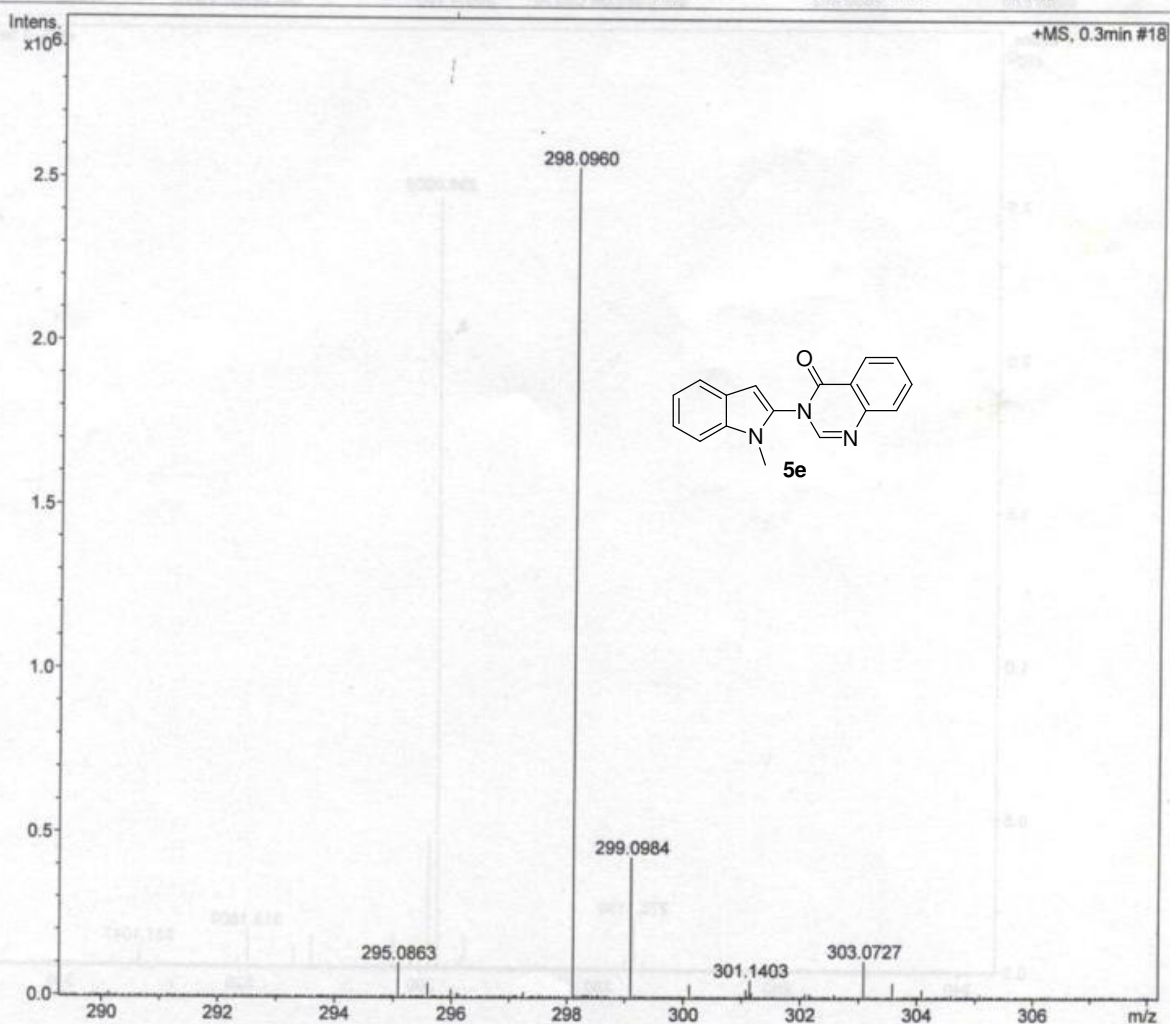

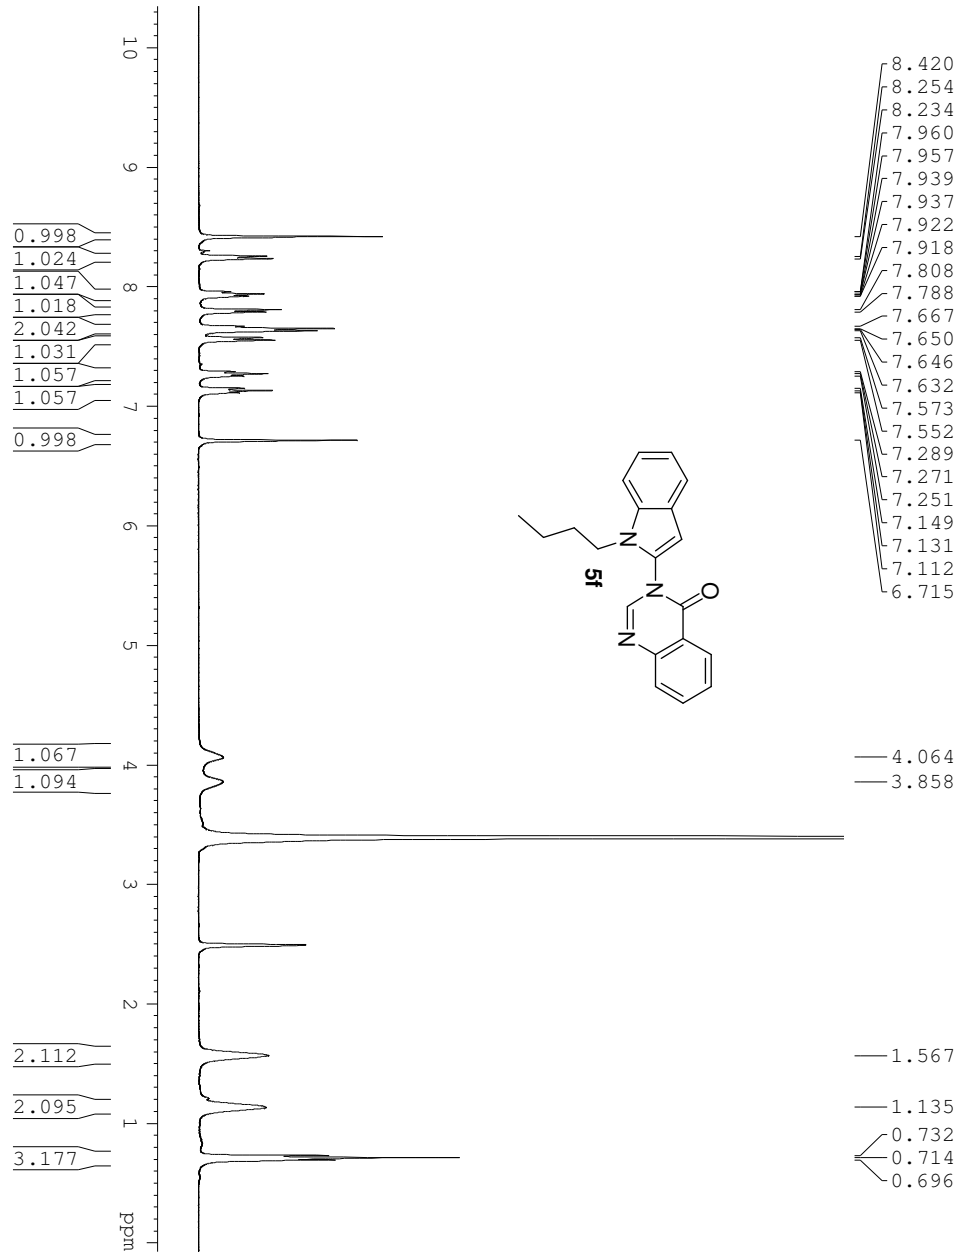

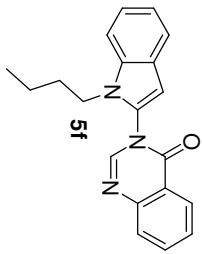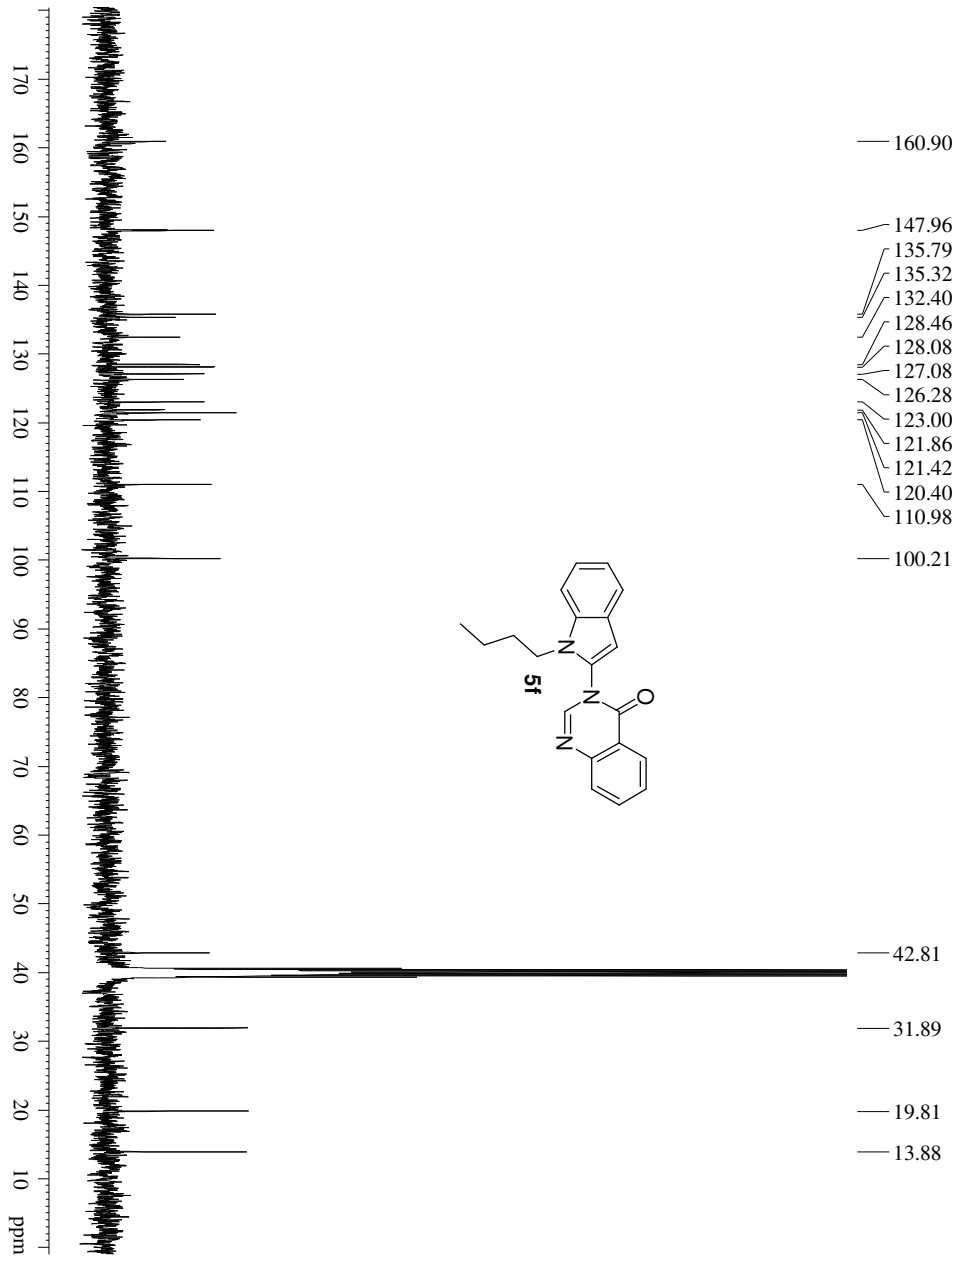



# BRUKER MAXIS HRMS REPORT

School of Chemistry  
University of Hyderabad

## Analysis Info

Analysis Name D:\Data\2013\Dr.NAGARAJAN\JUNE\SKG-138.d  
Method tune\_low\_Pos.m  
Sample Name SKG-138—DCM-MEOH  
Comment

Acquisition Date 6/4/2013 12:47:53 PM

Operator Ramu Sridhar  
Instrument maXis 10138

## Acquisition Parameter

|             |            |                       |           |                  |           |
|-------------|------------|-----------------------|-----------|------------------|-----------|
| Source Type | ESI        | Ion Polarity          | Positive  | Set Nebulizer    | 4.4 psi   |
| Focus       | Not active | Set Capillary         | 3800 V    | Set Dry Heater   | 180 °C    |
| Scan Begin  | 50 m/z     | Set End Plate Offset  | -500 V    | Set Dry Gas      | 4.0 l/min |
| Scan End    | 1500 m/z   | Set Collision Cell RF | 350.0 Vpp | Set Divert Valve | Waste     |

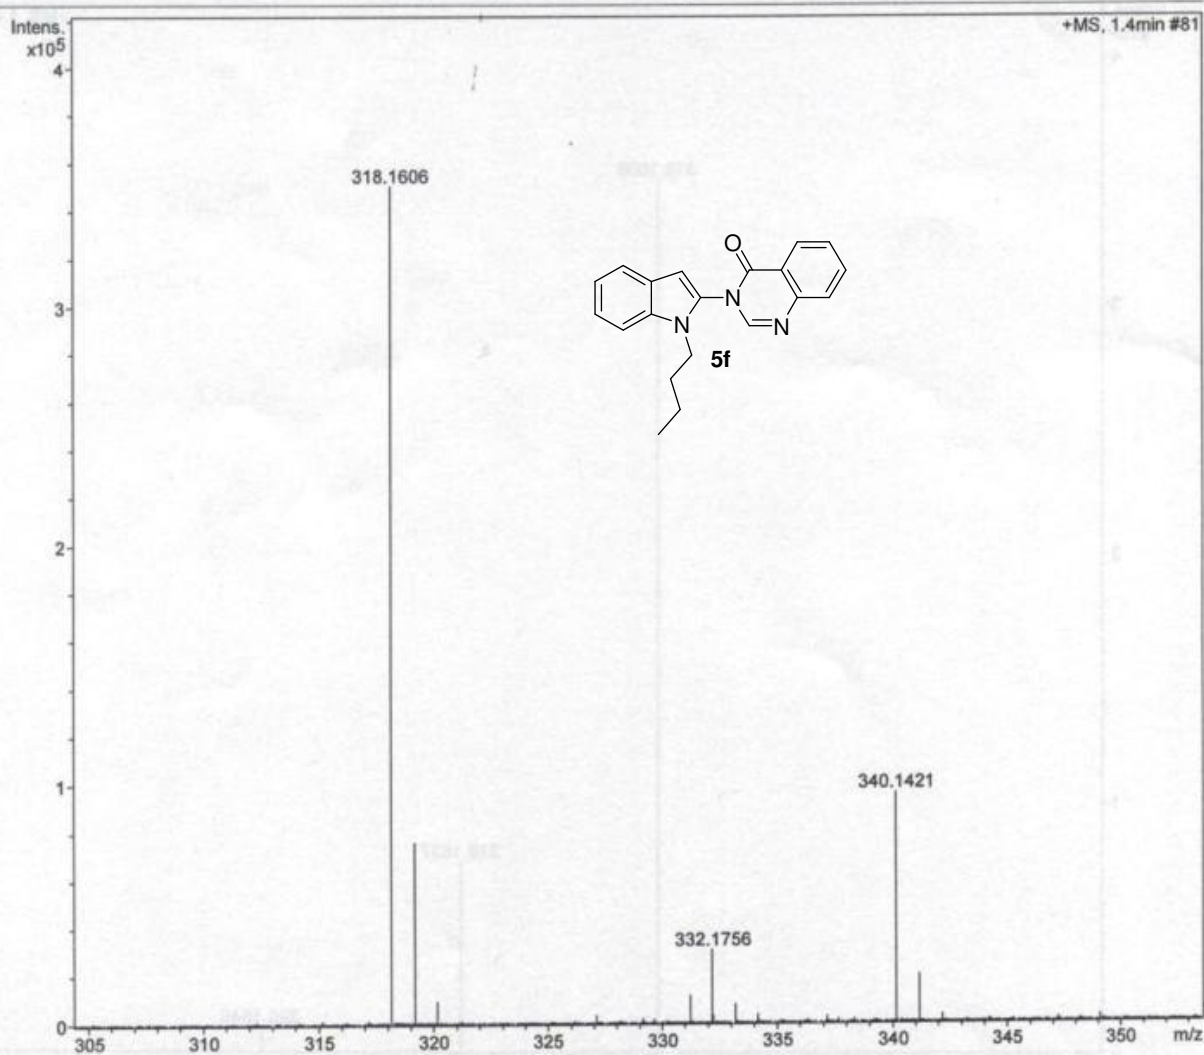

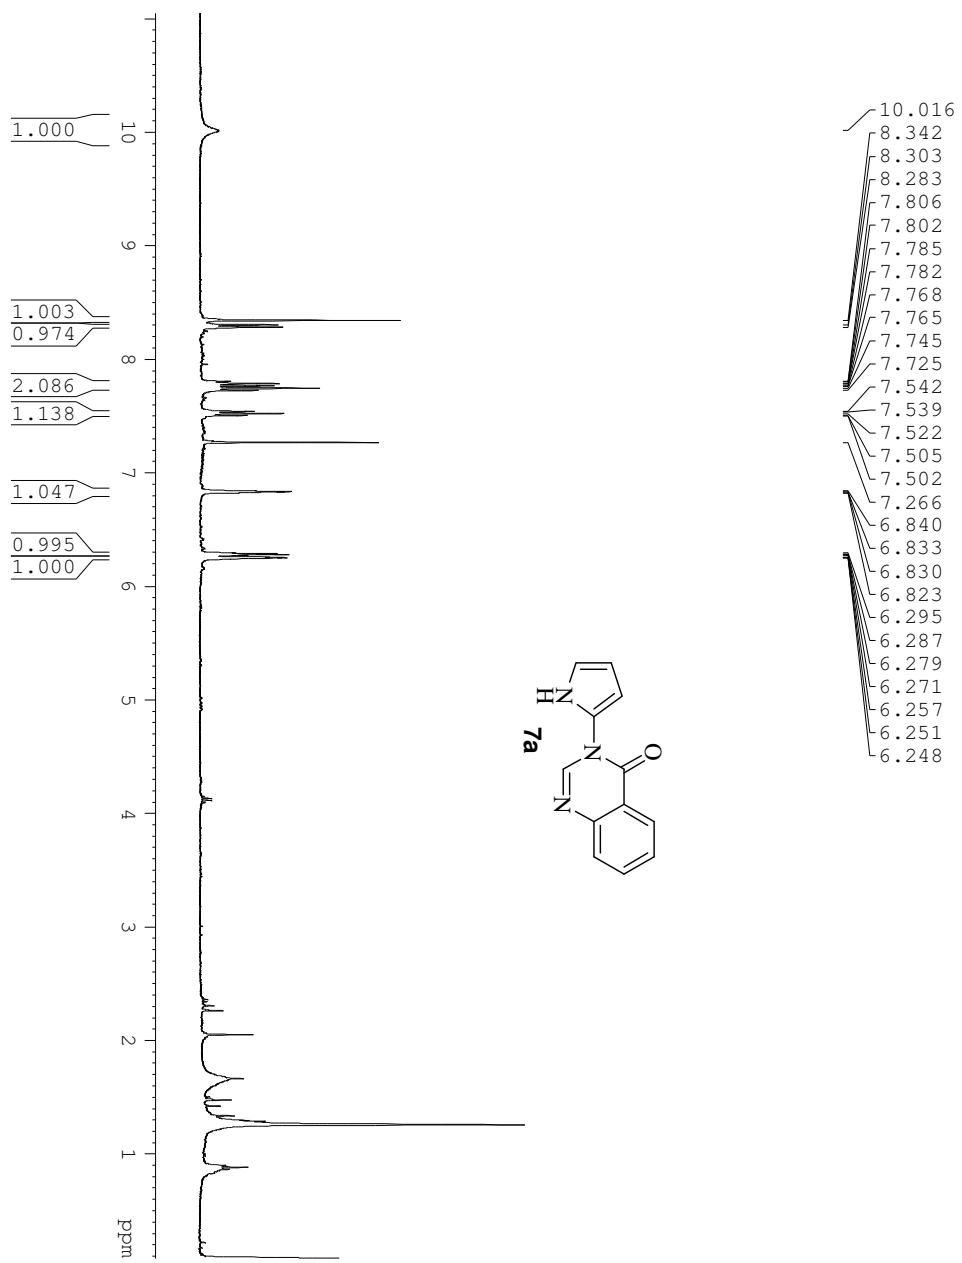

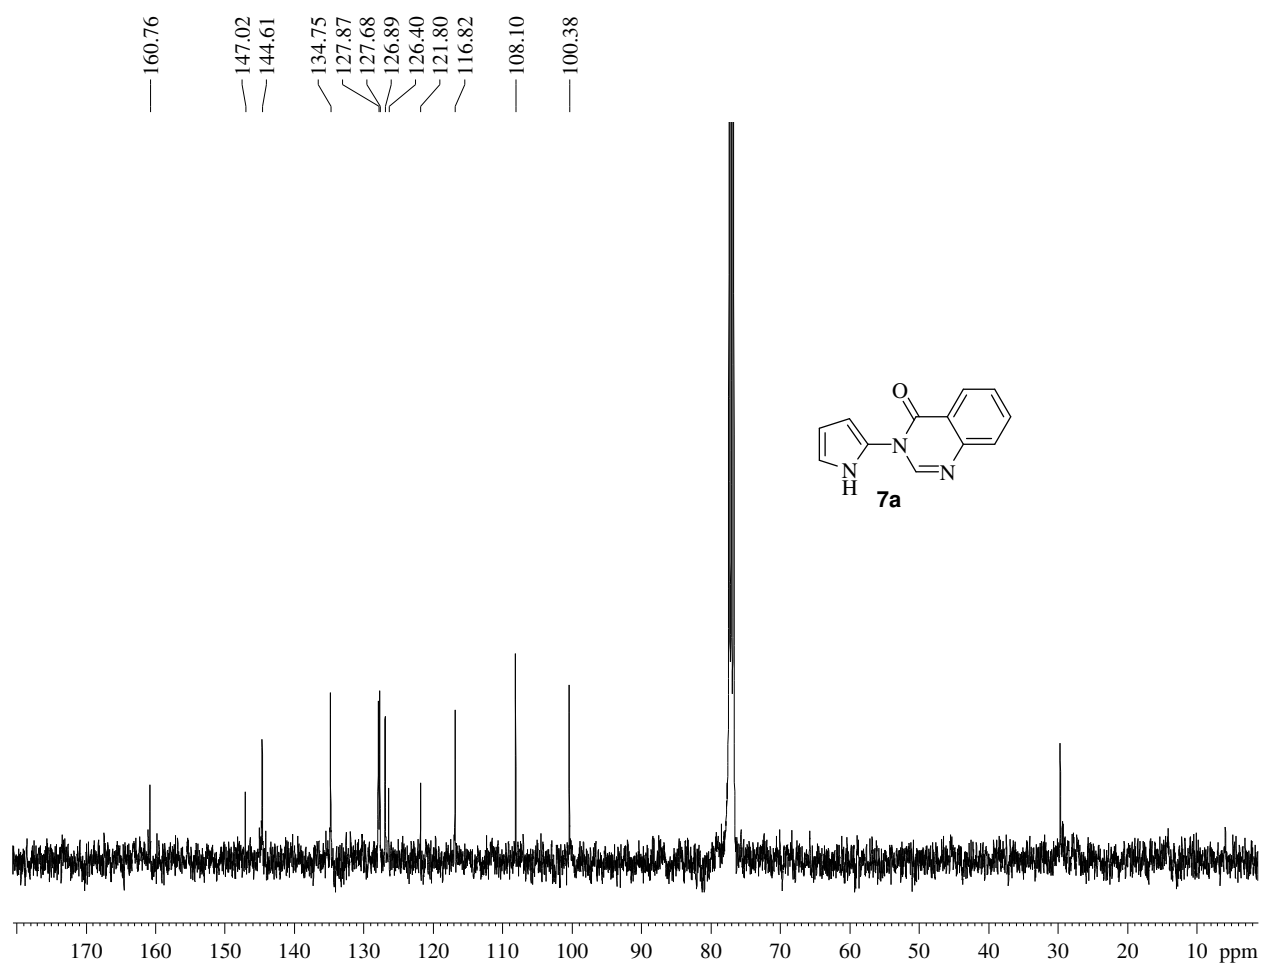

# BRUKER MAXIS HRMS REPORT

School of Chemistry  
University of Hyderabad

## Analysis Info

Analysis Name D:\Data\2013\Dr.NAGARAJAN\MARCH\SKG-86.d  
Method tune\_low\_PosR.m  
Sample Name SKG-86-DCM-MEOH  
Comment

Acquisition Date 3/11/2013 12:42:10 PM

Operator Rajesh Vashisth  
Instrument maXis 10138

## Acquisition Parameter

|             |            |                       |           |                  |           |
|-------------|------------|-----------------------|-----------|------------------|-----------|
| Source Type | ESI        | Ion Polarity          | Positive  | Set Nebulizer    | 4.4 psi   |
| Focus       | Not active | Set Capillary         | 3800 V    | Set Dry Heater   | 180 °C    |
| Scan Begin  | 50 m/z     | Set End Plate Offset  | -500 V    | Set Dry Gas      | 4.0 l/min |
| Scan End    | 1000 m/z   | Set Collision Cell RF | 350.0 Vpp | Set Divert Valve | Waste     |

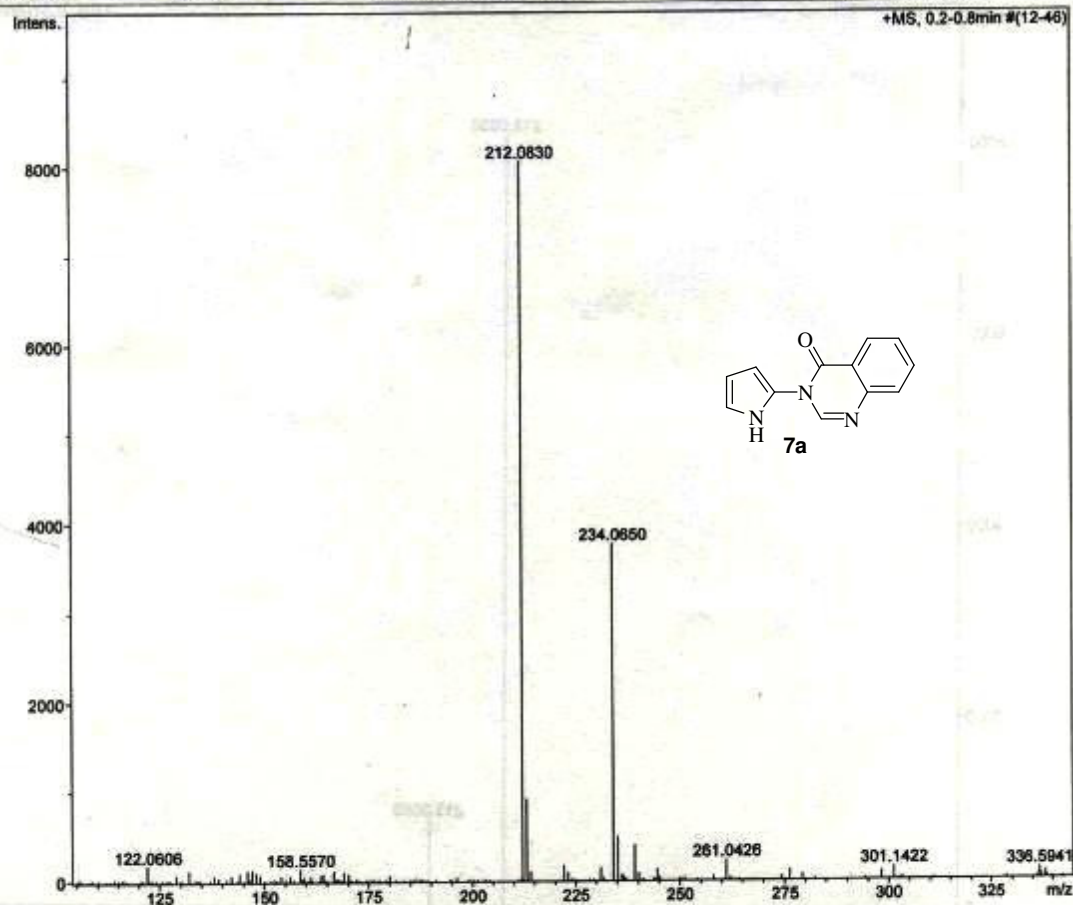

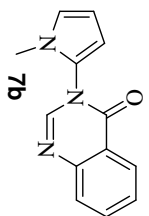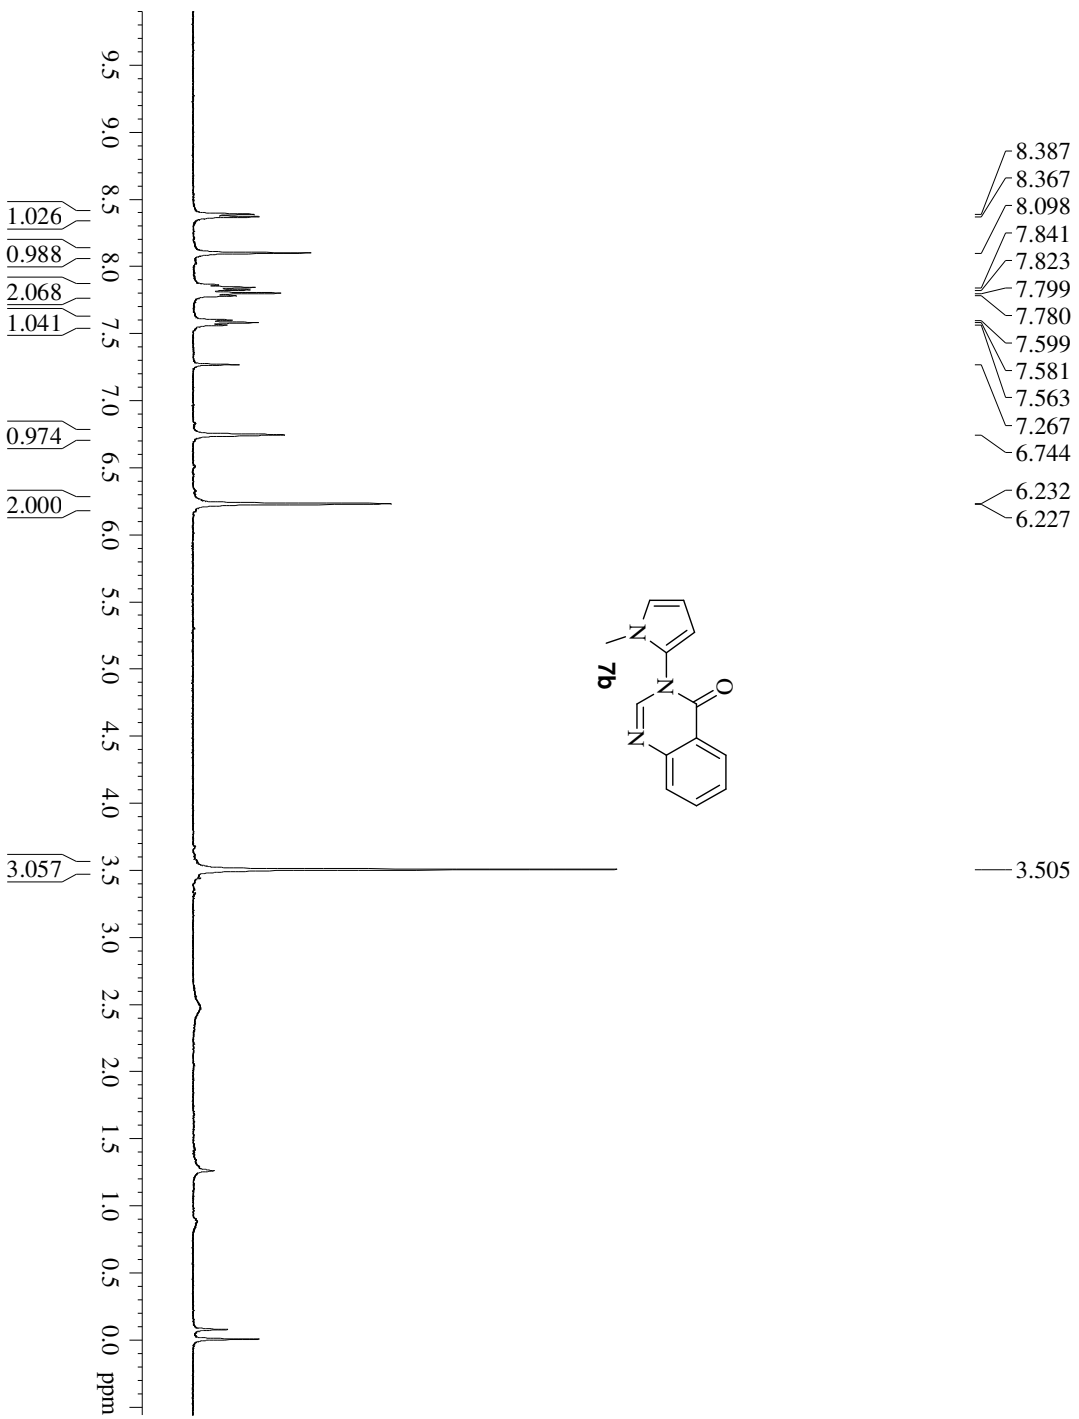

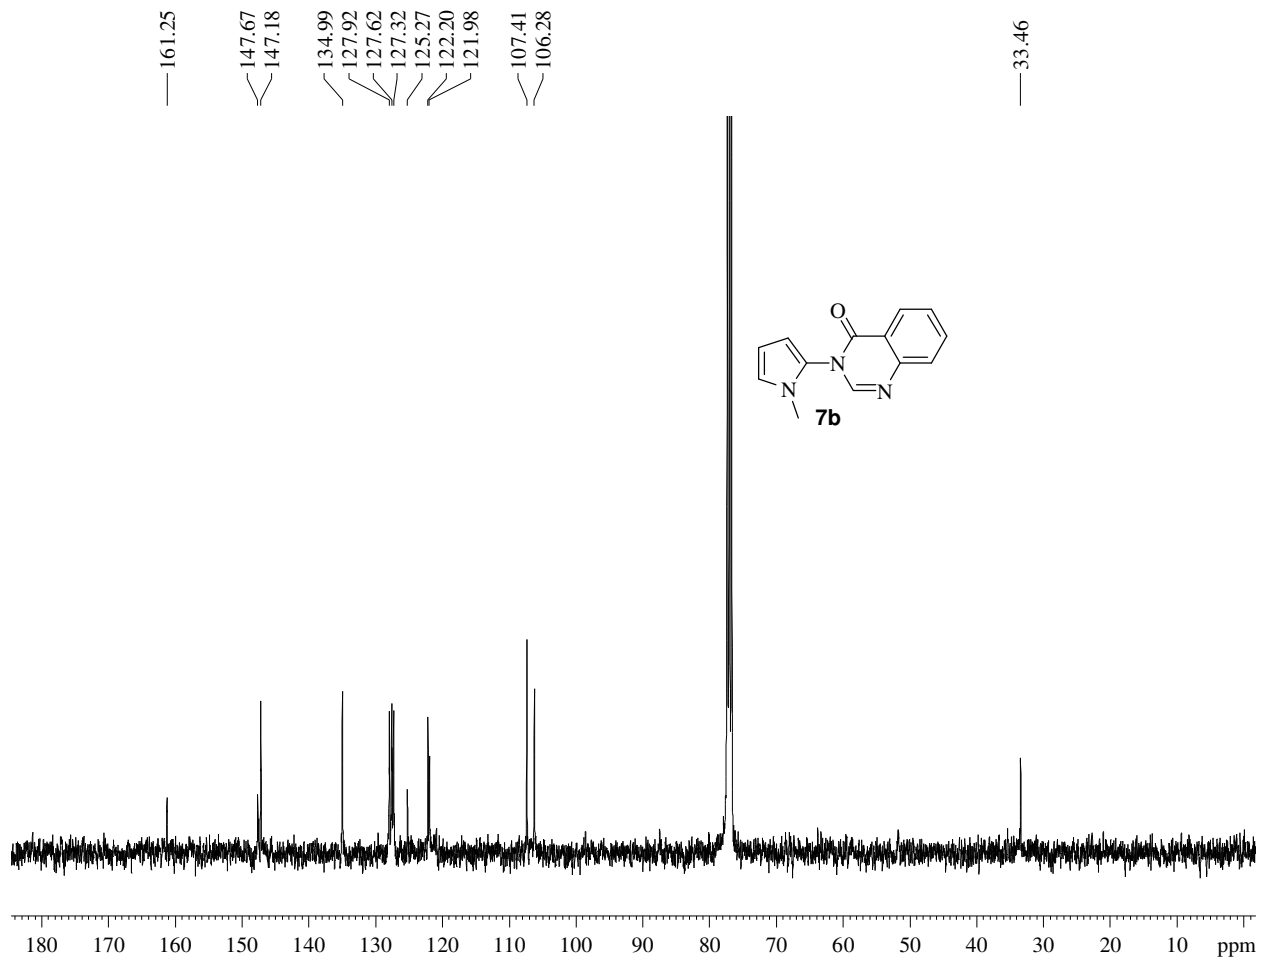

# BRUKER MAXIS HRMS REPORT

School of Chemistry  
University of Hyderabad

## Analysis Info

Analysis Name D:\Data\2013\Dr.NAGARAJAN\JULY\SKG-200.d  
Method tune\_low\_Pos.m  
Sample Name SKG-200-DCM-MEOH  
Comment

Acquisition Date 7/23/2013 11:45:11 AM

Operator Ramu Sridhar  
Instrument maXis 10138

## Acquisition Parameter

|             |            |                       |           |                  |           |
|-------------|------------|-----------------------|-----------|------------------|-----------|
| Source Type | ESI        | Ion Polarity          | Positive  | Set Nebulizer    | 4.4 psi   |
| Focus       | Not active | Set Capillary         | 3800 V    | Set Dry Heater   | 180 °C    |
| Scan Begin  | 50 m/z     | Set End Plate Offset  | -500 V    | Set Dry Gas      | 4.0 l/min |
| Scan End    | 1500 m/z   | Set Collision Cell RF | 350.0 Vpp | Set Divert Valve | Waste     |

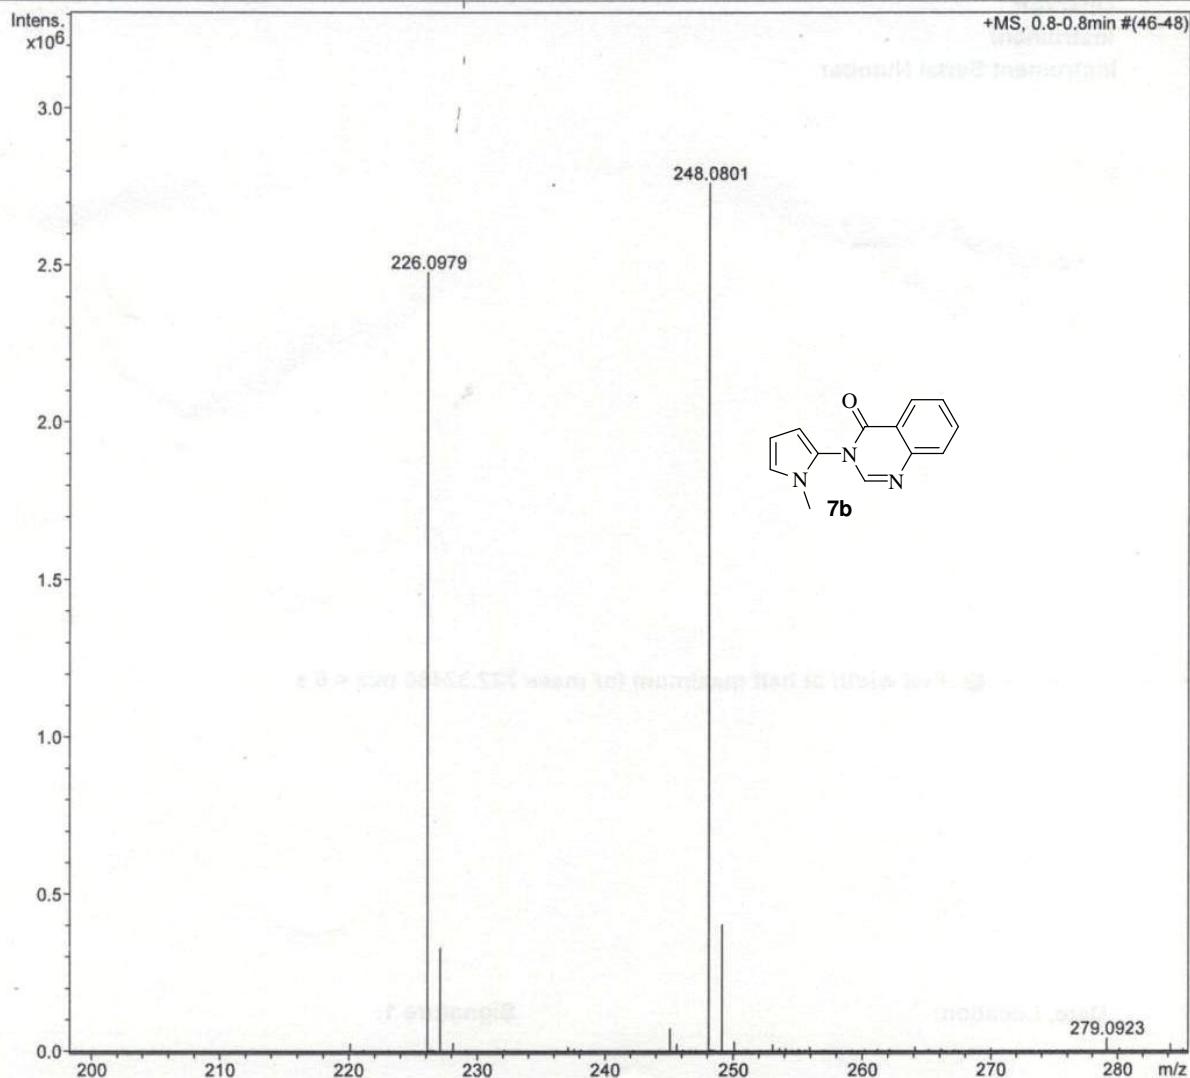

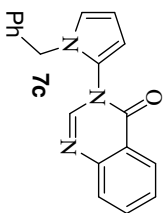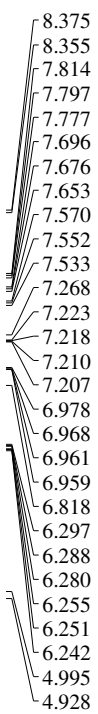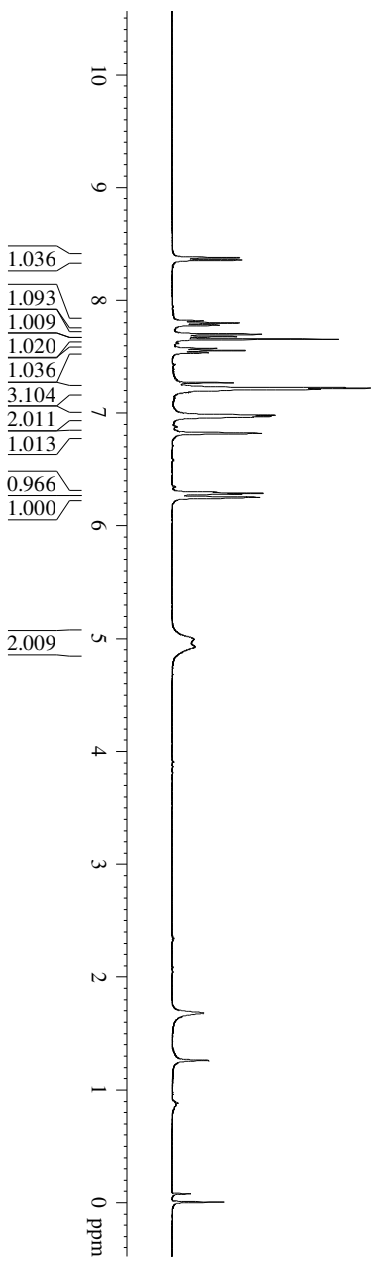



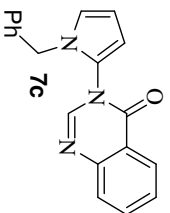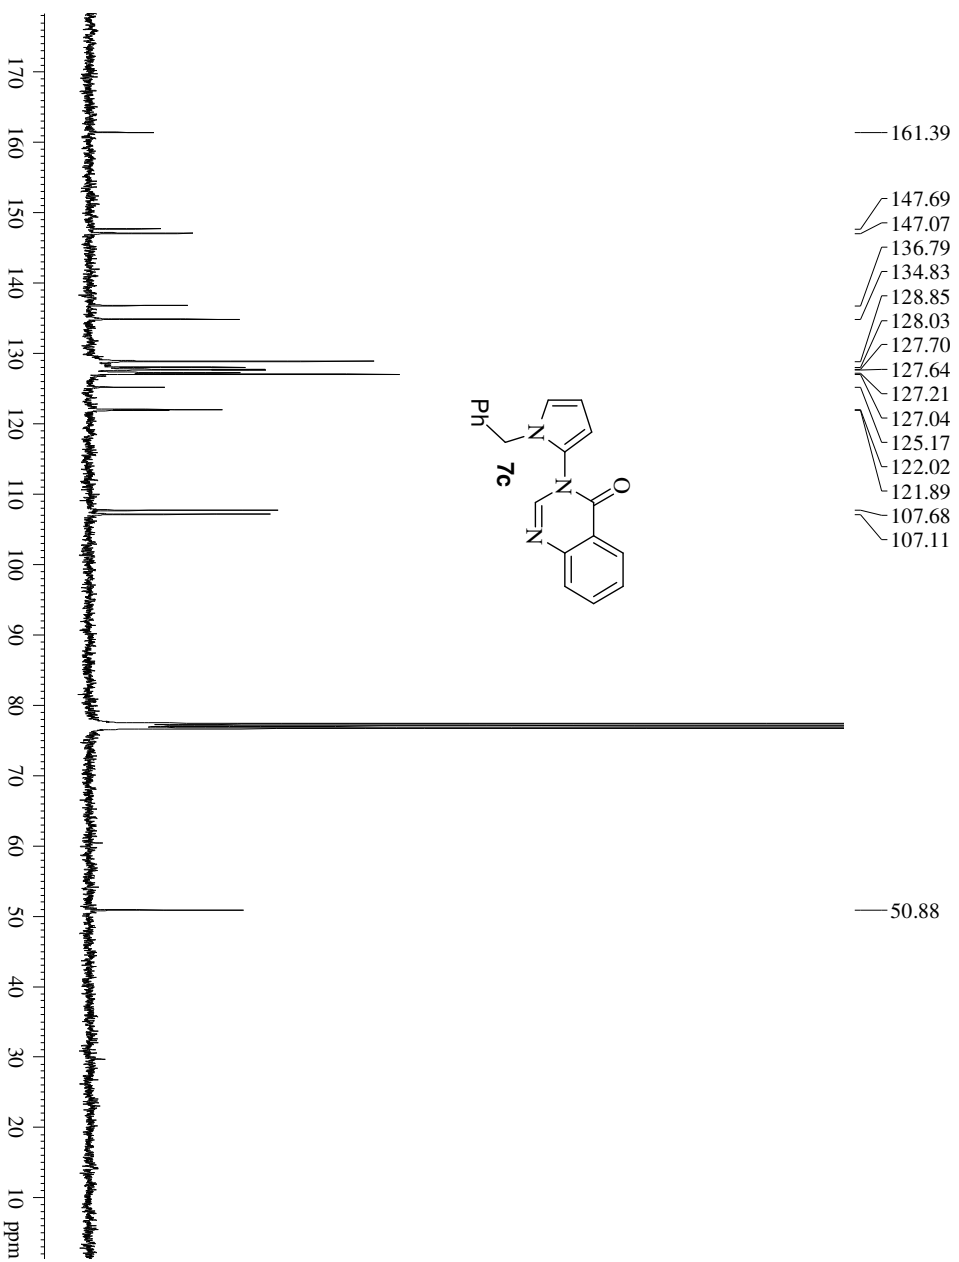

# BRUKER MAXIS HRMS REPORT

School of Chemistry  
University of Hyderabad

## Analysis Info

Analysis Name D:\Data\2013\Dr.NAGARAJAN\JULY\SKG-188.d  
Method tune\_low\_Pos.m  
Sample Name SKG-188-DCM-MEOH  
Comment

Acquisition Date 7/23/2013 12:10:46 PM

Operator Ramu Sridhar  
Instrument maXis 10138

## Acquisition Parameter

|             |            |                       |           |                  |           |
|-------------|------------|-----------------------|-----------|------------------|-----------|
| Source Type | ESI        | Ion Polarity          | Positive  | Set Nebulizer    | 4.4 psi   |
| Focus       | Not active | Set Capillary         | 4200 V    | Set Dry Heater   | 180 °C    |
| Scan Begin  | 50 m/z     | Set End Plate Offset  | -500 V    | Set Dry Gas      | 4.0 l/min |
| Scan End    | 1500 m/z   | Set Collision Cell RF | 350.0 Vpp | Set Divert Valve | Waste     |

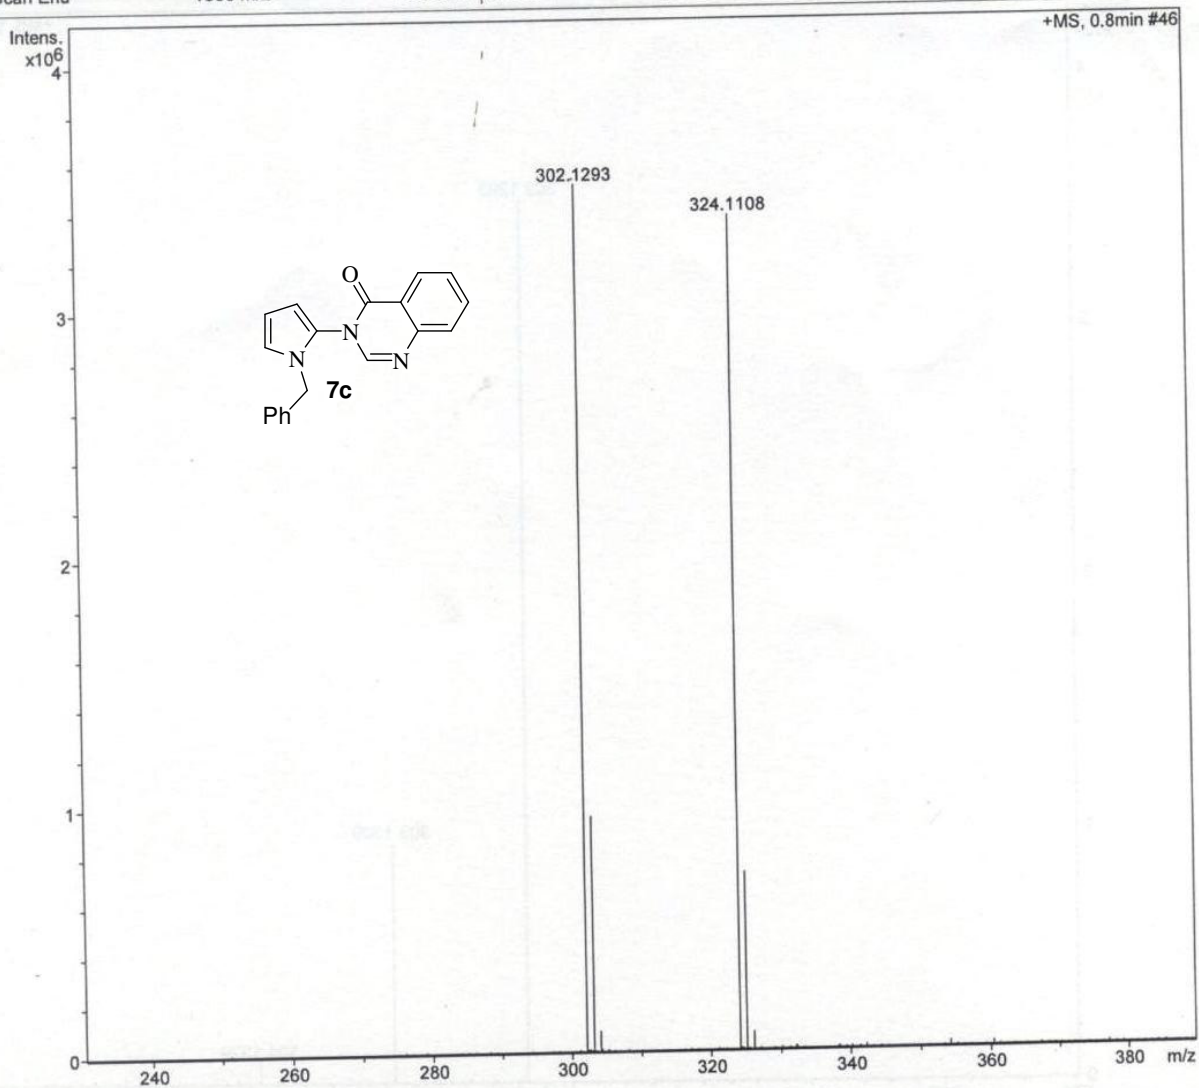

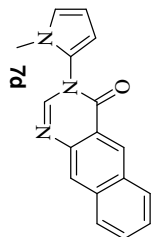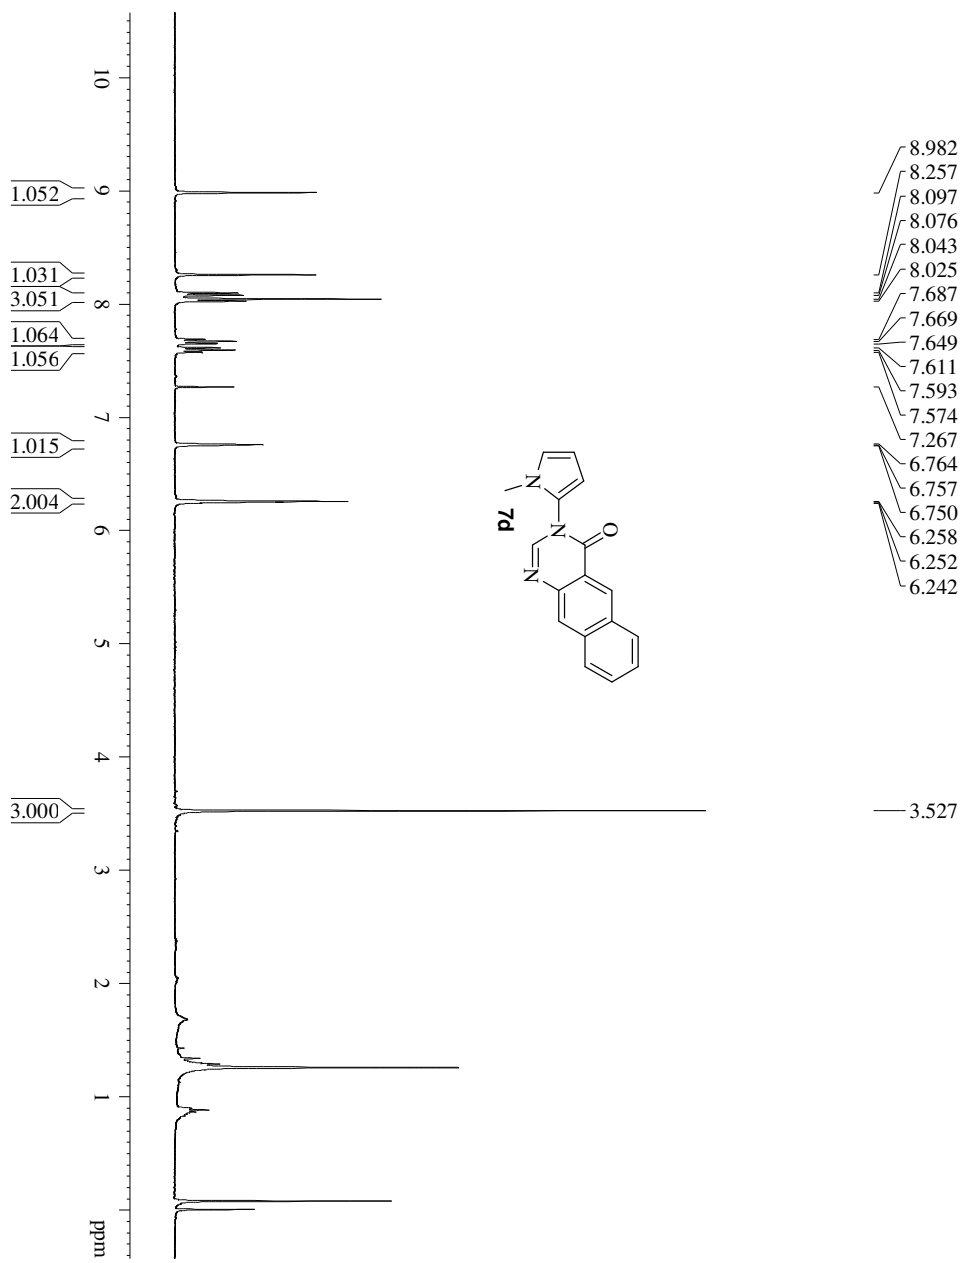

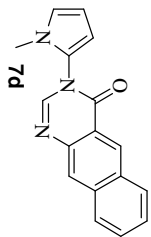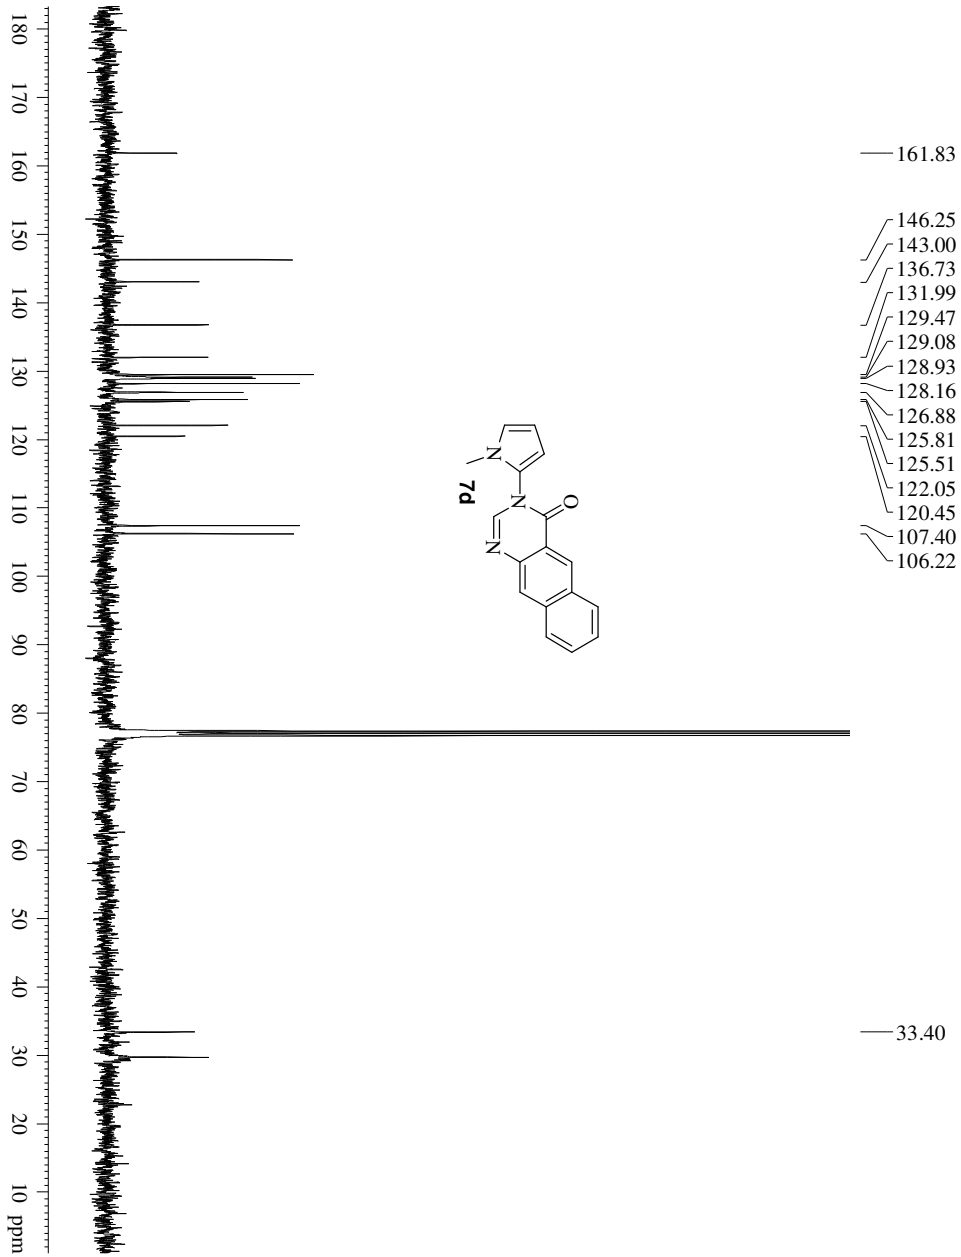

# BRUKER MAXIS HRMS REPORT

School of Chemistry  
University of Hyderabad

## Analysis Info

Analysis Name D:\Data\2013\Dr.NAGARAJAN\JULY\SKG-201.d  
Method tune\_low\_Pos.m  
Sample Name SKG-201-DCM-MEOH  
Comment

Acquisition Date 7/23/2013 12:00:10 PM

Operator Ramu Sridhar  
Instrument maXis 10138

## Acquisition Parameter

|             |            |                       |           |                  |           |
|-------------|------------|-----------------------|-----------|------------------|-----------|
| Source Type | ESI        | Ion Polarity          | Positive  | Set Nebulizer    | 4.4 psi   |
| Focus       | Not active | Set Capillary         | 3800 V    | Set Dry Heater   | 180 °C    |
| Scan Begin  | 50 m/z     | Set End Plate Offset  | -500 V    | Set Dry Gas      | 4.0 l/min |
| Scan End    | 1500 m/z   | Set Collision Cell RF | 350.0 Vpp | Set Divert Valve | Waste     |

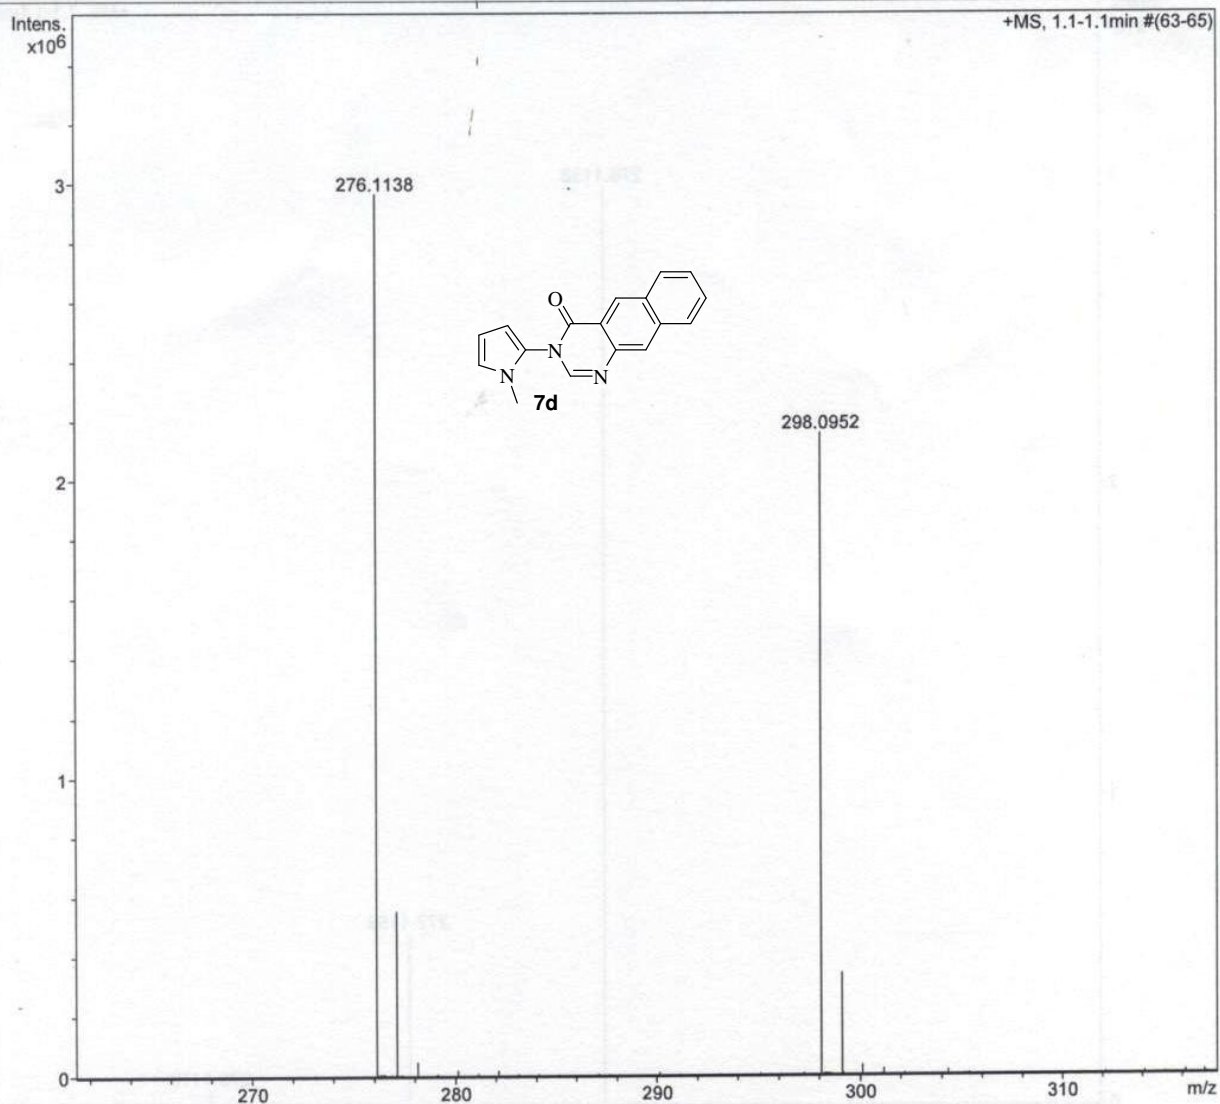

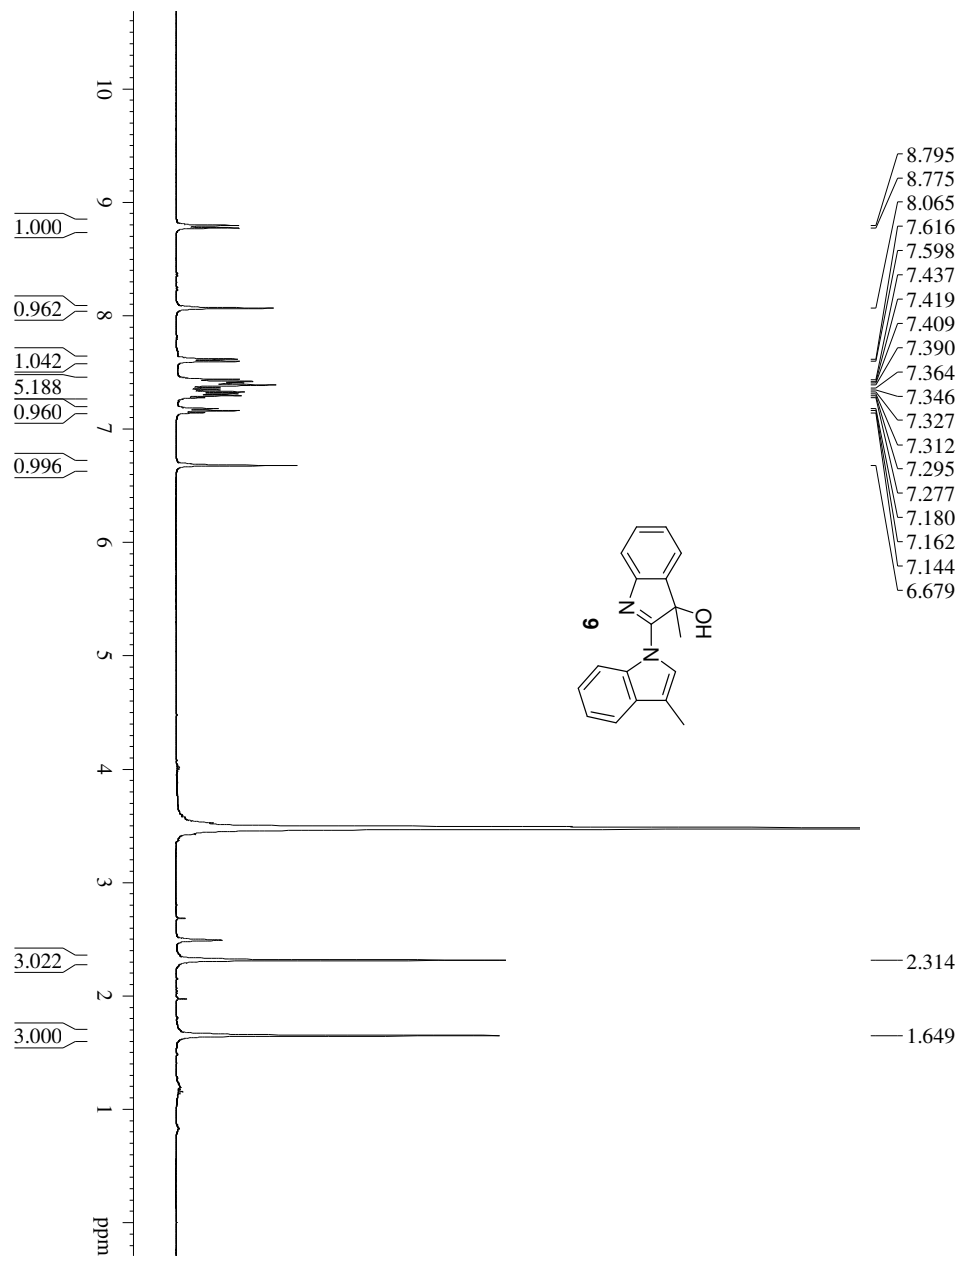

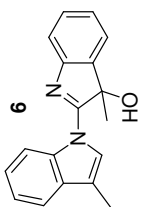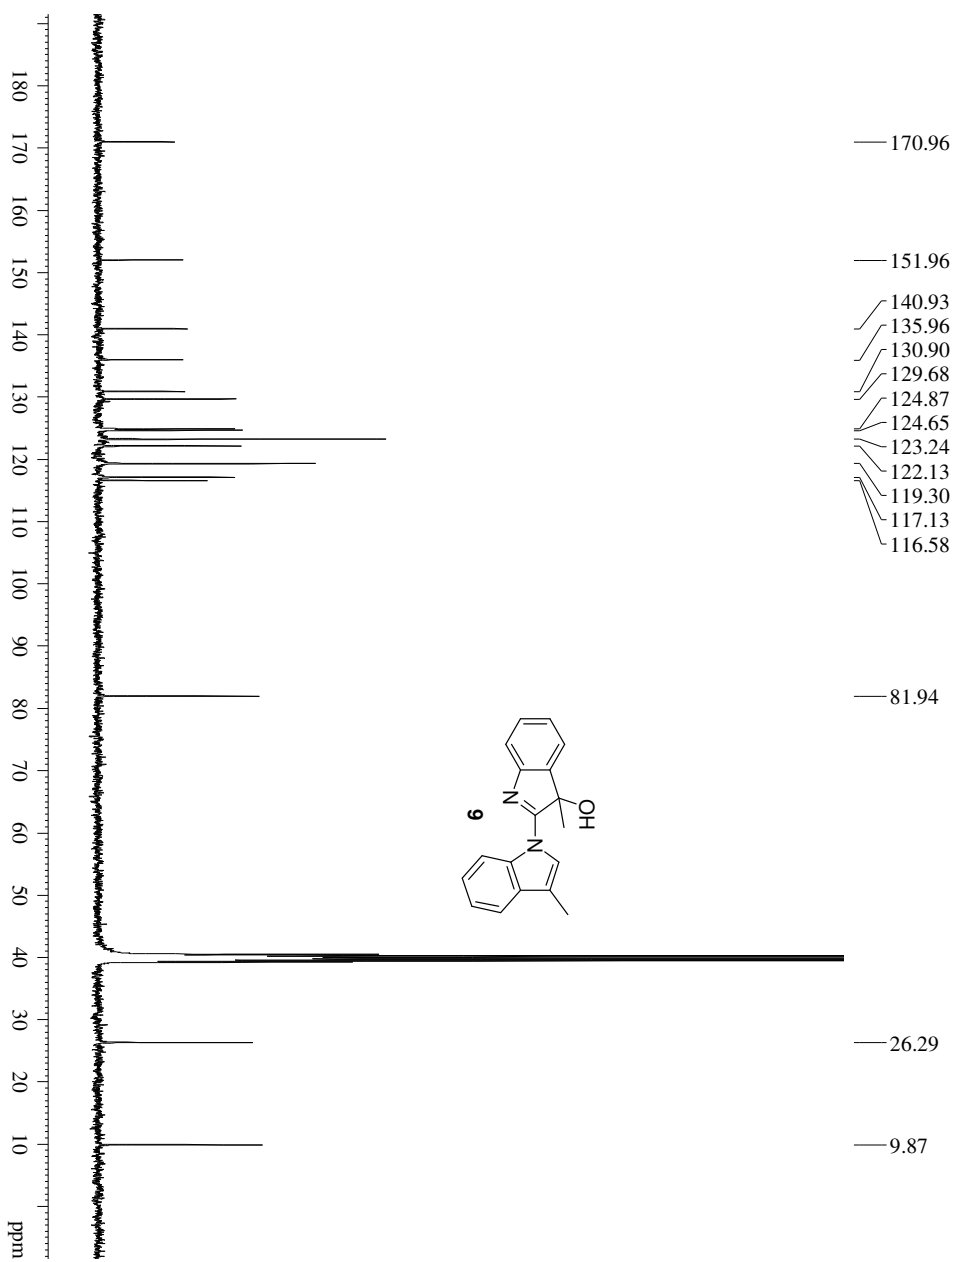

# BRUKER MAXIS HRMS REPORT

School of Chemistry  
University of Hyderabad

## Analysis Info

Analysis Name D:\Data\2013\Dr.NAGARAJAN\JULY\SKG-69.d  
Method tune\_low\_Pos-R2.m  
Sample Name SKG-69--DCM-MEOH  
Comment

Acquisition Date 7/26/2013 2:53:34 PM

Operator Ramu Sridhar  
Instrument maXis 10138

## Acquisition Parameter

|             |            |                       |           |                  |           |
|-------------|------------|-----------------------|-----------|------------------|-----------|
| Source Type | ESI        | Ion Polarity          | Positive  | Set Nebulizer    | 4.4 psi   |
| Focus       | Not active | Set Capillary         | 2400 V    | Set Dry Heater   | 180 °C    |
| Scan Begin  | 50 m/z     | Set End Plate Offset  | -500 V    | Set Dry Gas      | 4.0 l/min |
| Scan End    | 2580 m/z   | Set Collision Cell RF | 350.0 Vpp | Set Divert Valve | Waste     |

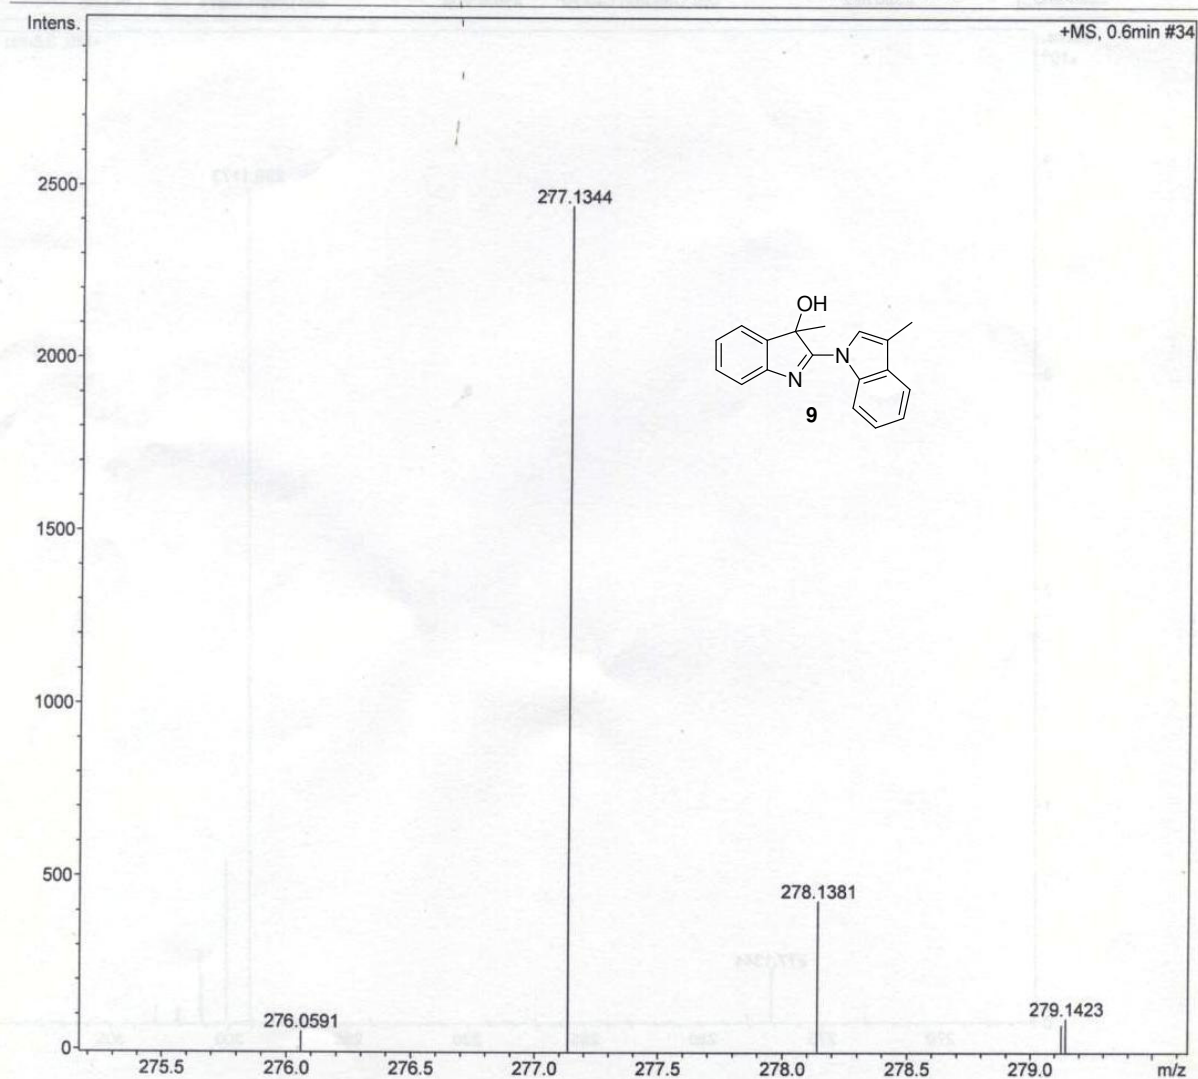



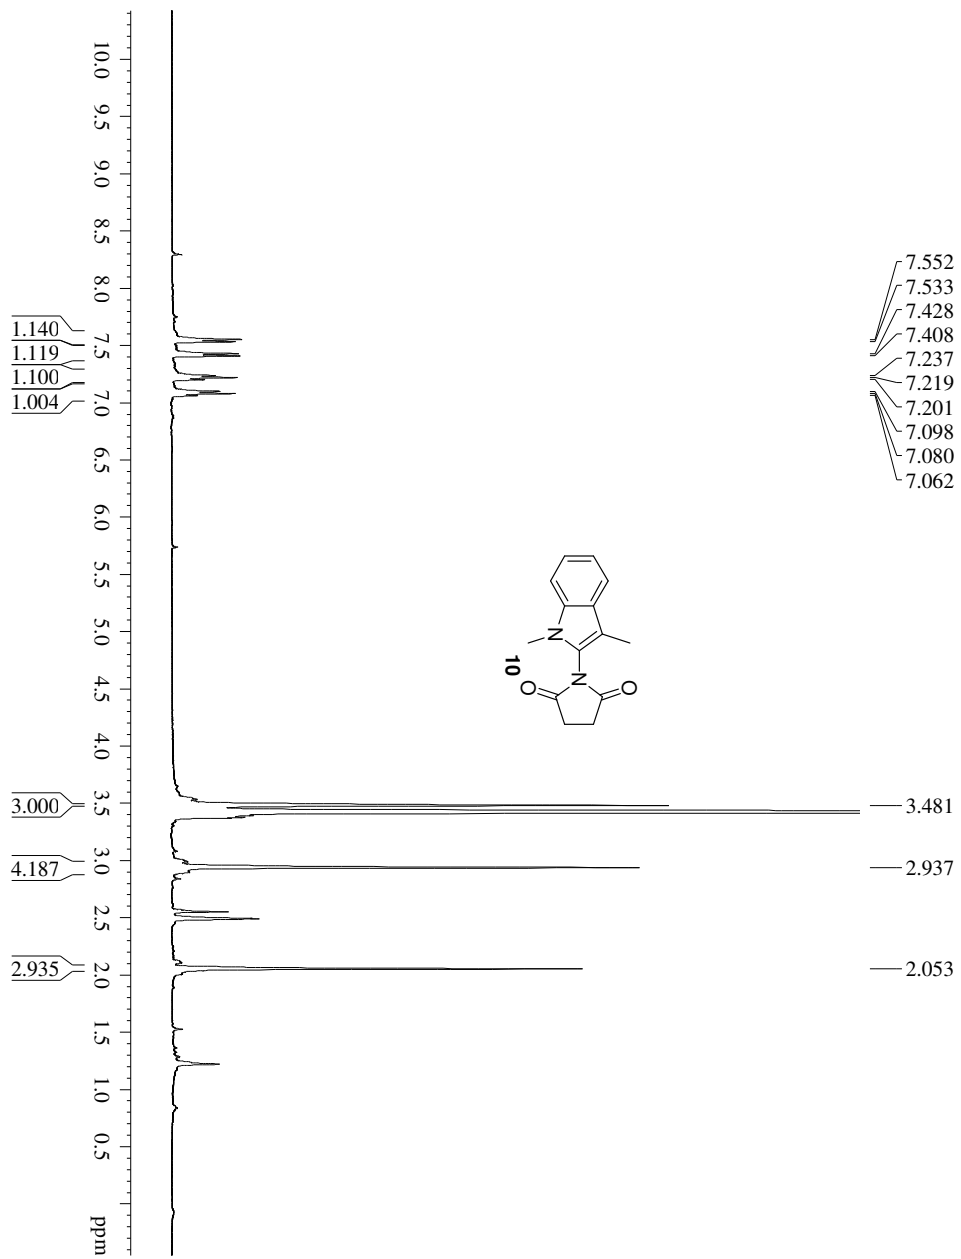

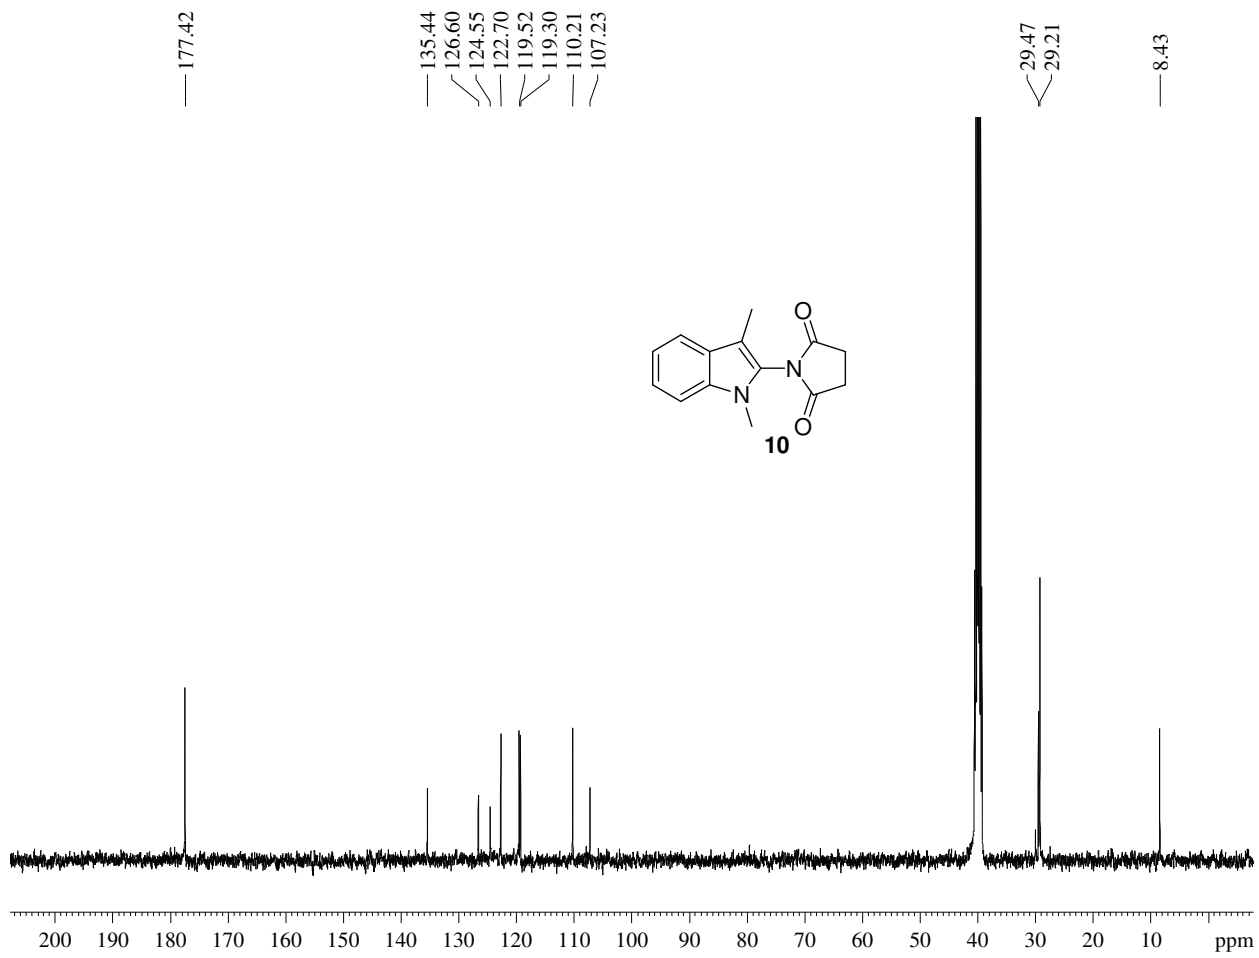

# BRUKER MAXIS HRMS REPORT

School of Chemistry  
University of Hyderabad

## Analysis Info

Analysis Name D:\Data\2013\Dr.NAGARAJANMAYISKG-195R.d  
Method tune\_low\_Pos.m  
Sample Name SKG-195-DCM-MEOH  
Comment

Acquisition Date 5/31/2013 4:10:34 PM

Operator Ramu Sridhar  
Instrument maXis 10138

## Acquisition Parameter

|             |            |                       |           |                  |           |
|-------------|------------|-----------------------|-----------|------------------|-----------|
| Source Type | ESI        | Ion Polarity          | Positive  | Set Nebulizer    | 4.4 psi   |
| Focus       | Not active | Set Capillary         | 3800 V    | Set Dry Heater   | 180 °C    |
| Scan Begin  | 50 m/z     | Set End Plate Offset  | -500 V    | Set Dry Gas      | 4.0 l/min |
| Scan End    | 1500 m/z   | Set Collision Cell RF | 350.0 Vpp | Set Divert Valve | Waste     |

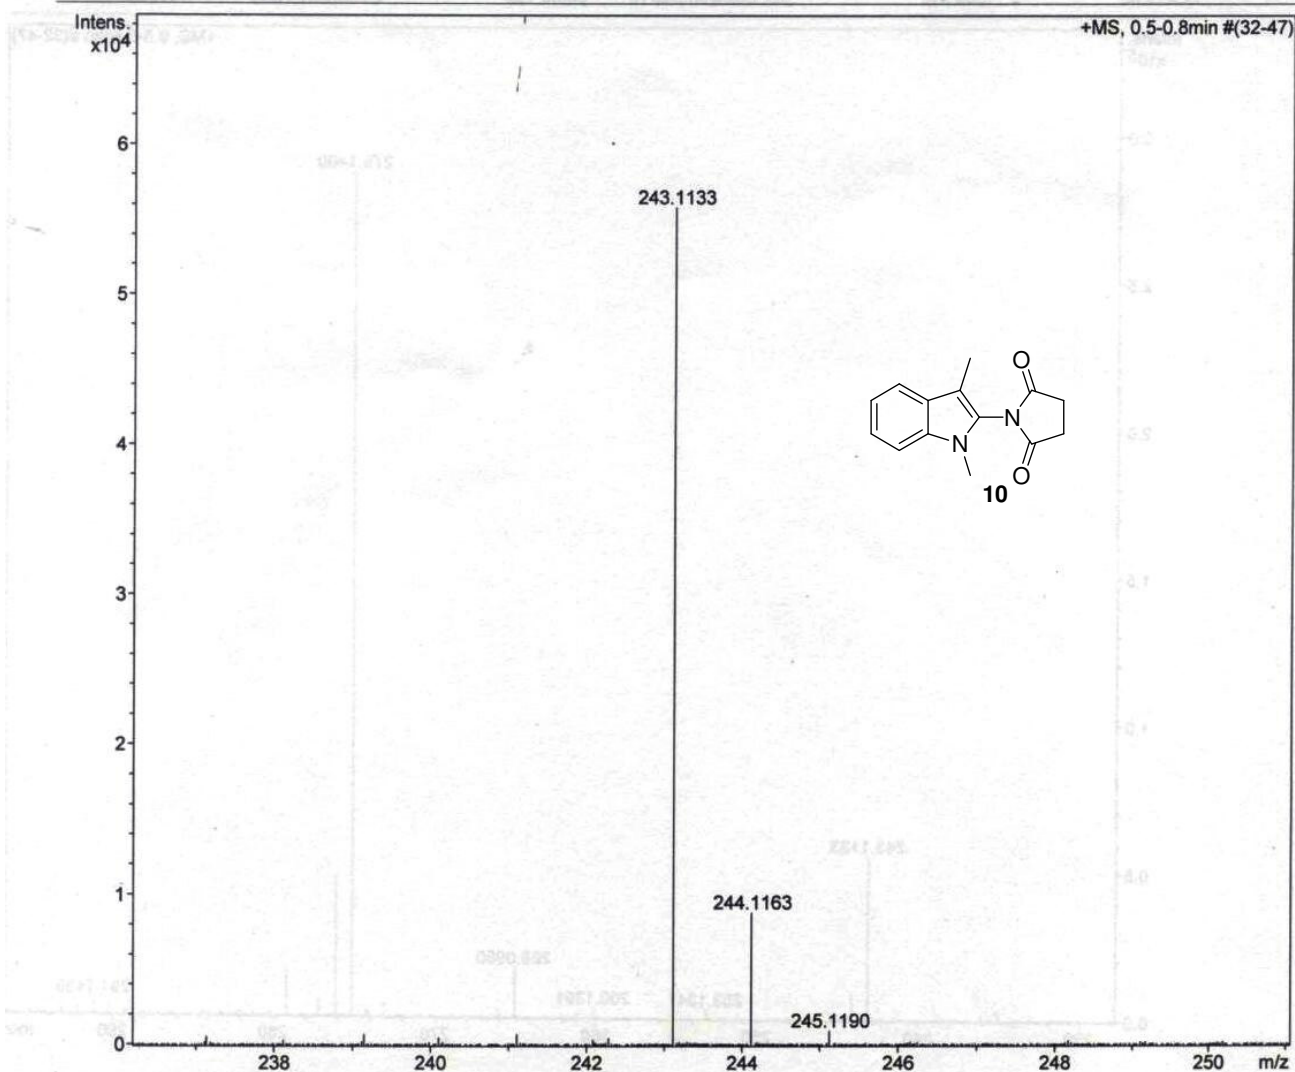

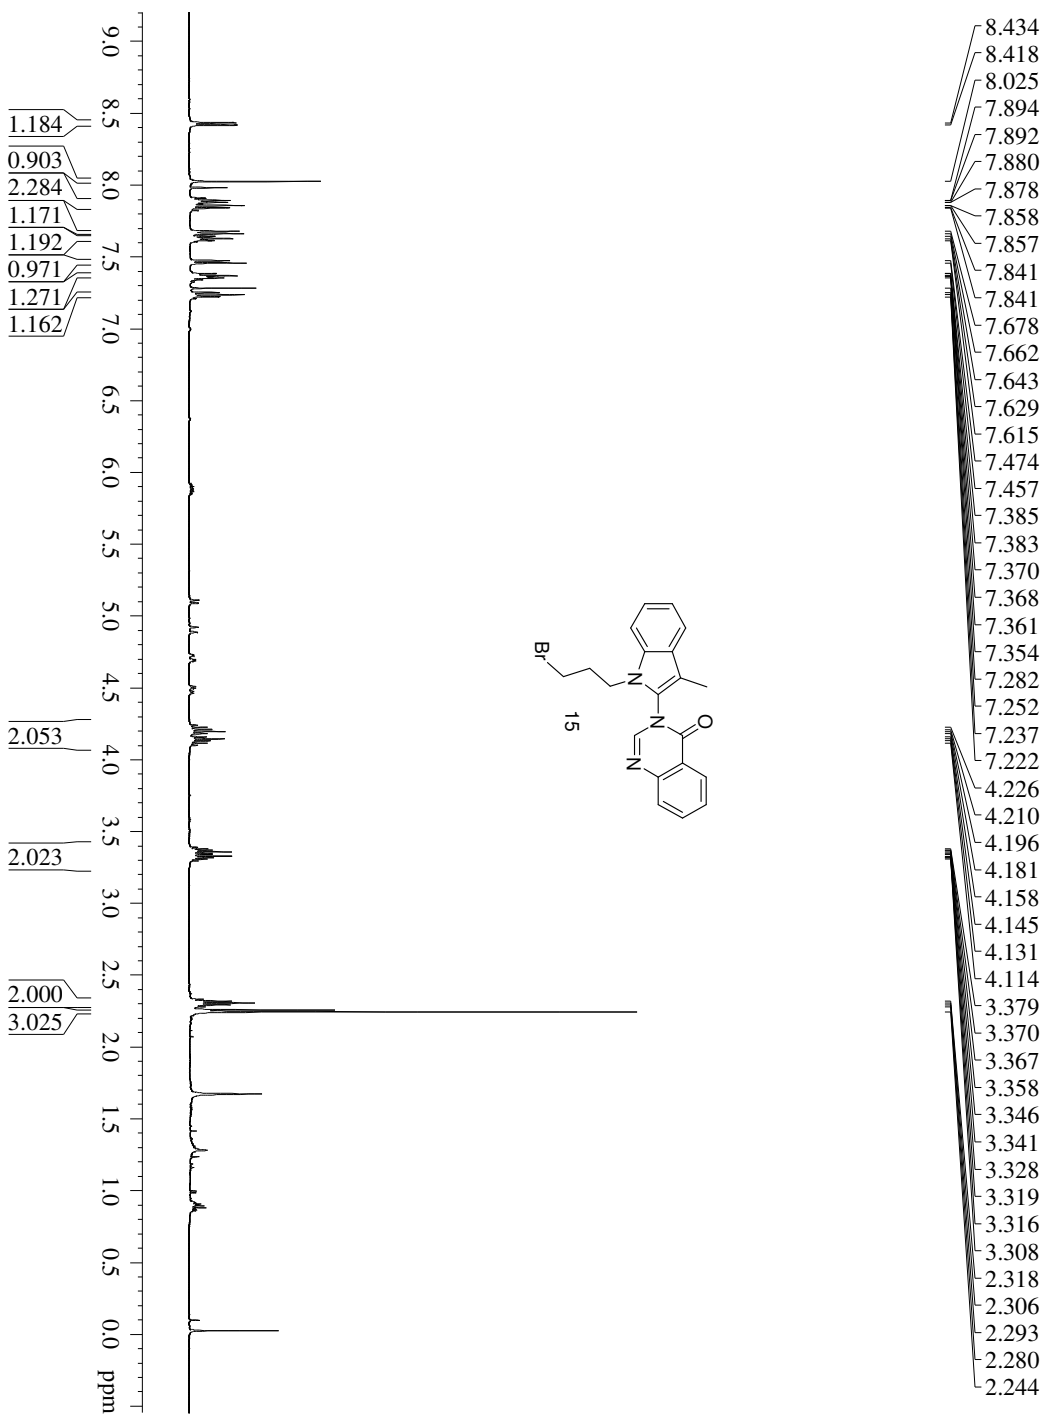

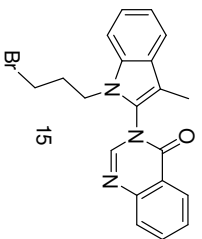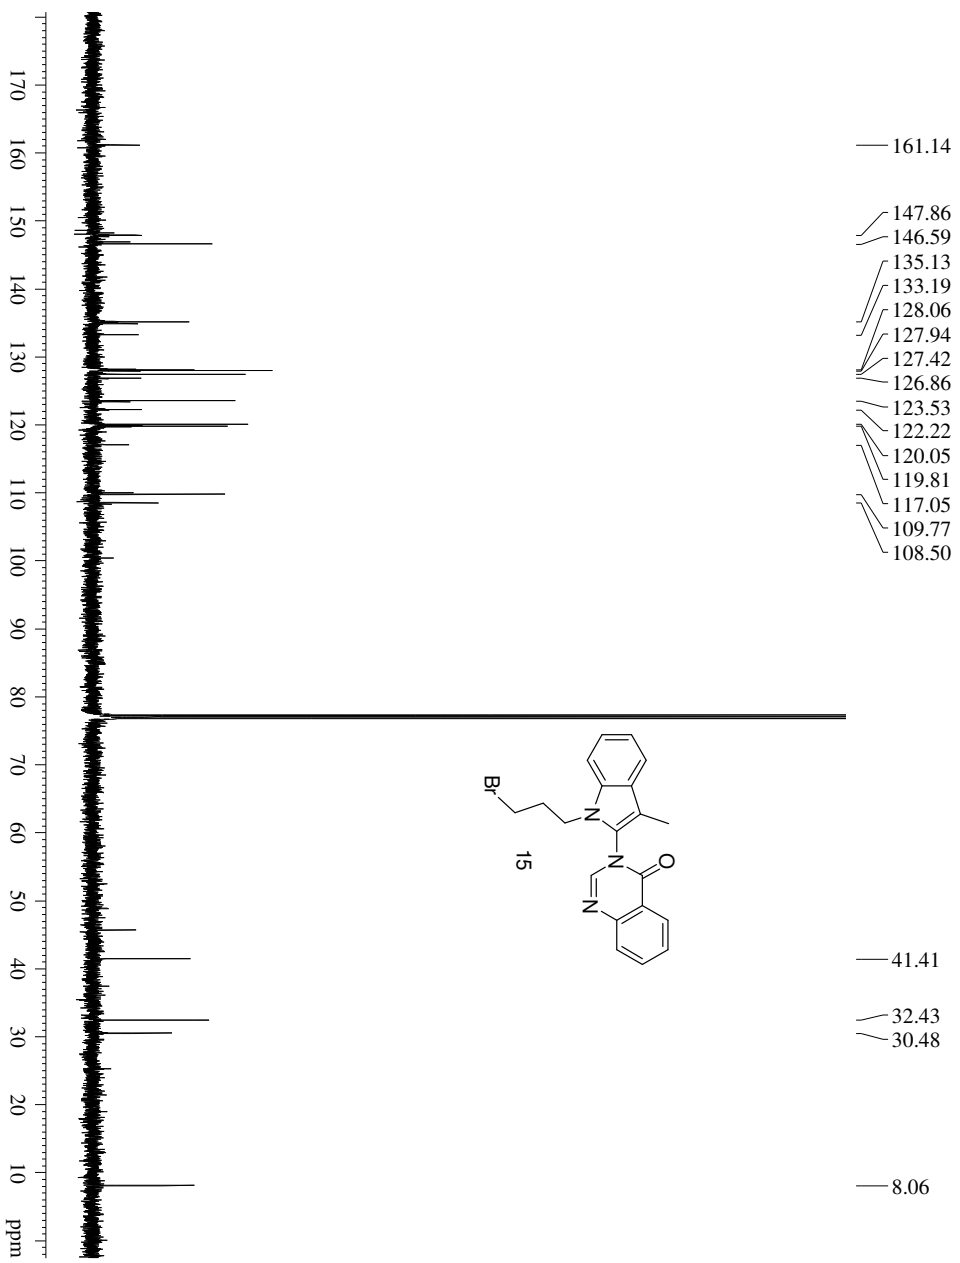

BRUKER MAXIS HRMS REPORT  
School of Chemistry  
University of Hyderabad

Analysis Info

Analysis Name D:\Data\2013\Dr.NAGARAJAN\JULY\SKG-251-I.d  
Method tune\_low\_Pos.m  
Sample Name SKG-251-I-DCM-MEOH  
Comment

Acquisition Date 7/23/2013 12:27:45 PM

Operator Ramu Sridhar  
Instrument maXis 10138

Acquisition Parameter

|             |            |                       |           |                  |           |
|-------------|------------|-----------------------|-----------|------------------|-----------|
| Source Type | ESI        | Ion Polarity          | Positive  | Set Nebulizer    | 4.4 psi   |
| Focus       | Not active | Set Capillary         | 3800 V    | Set Dry Heater   | 180 °C    |
| Scan Begin  | 50 m/z     | Set End Plate Offset  | -500 V    | Set Dry Gas      | 4.0 l/min |
| Scan End    | 1500 m/z   | Set Collision Cell RF | 350.0 Vpp | Set Divert Valve | Waste     |

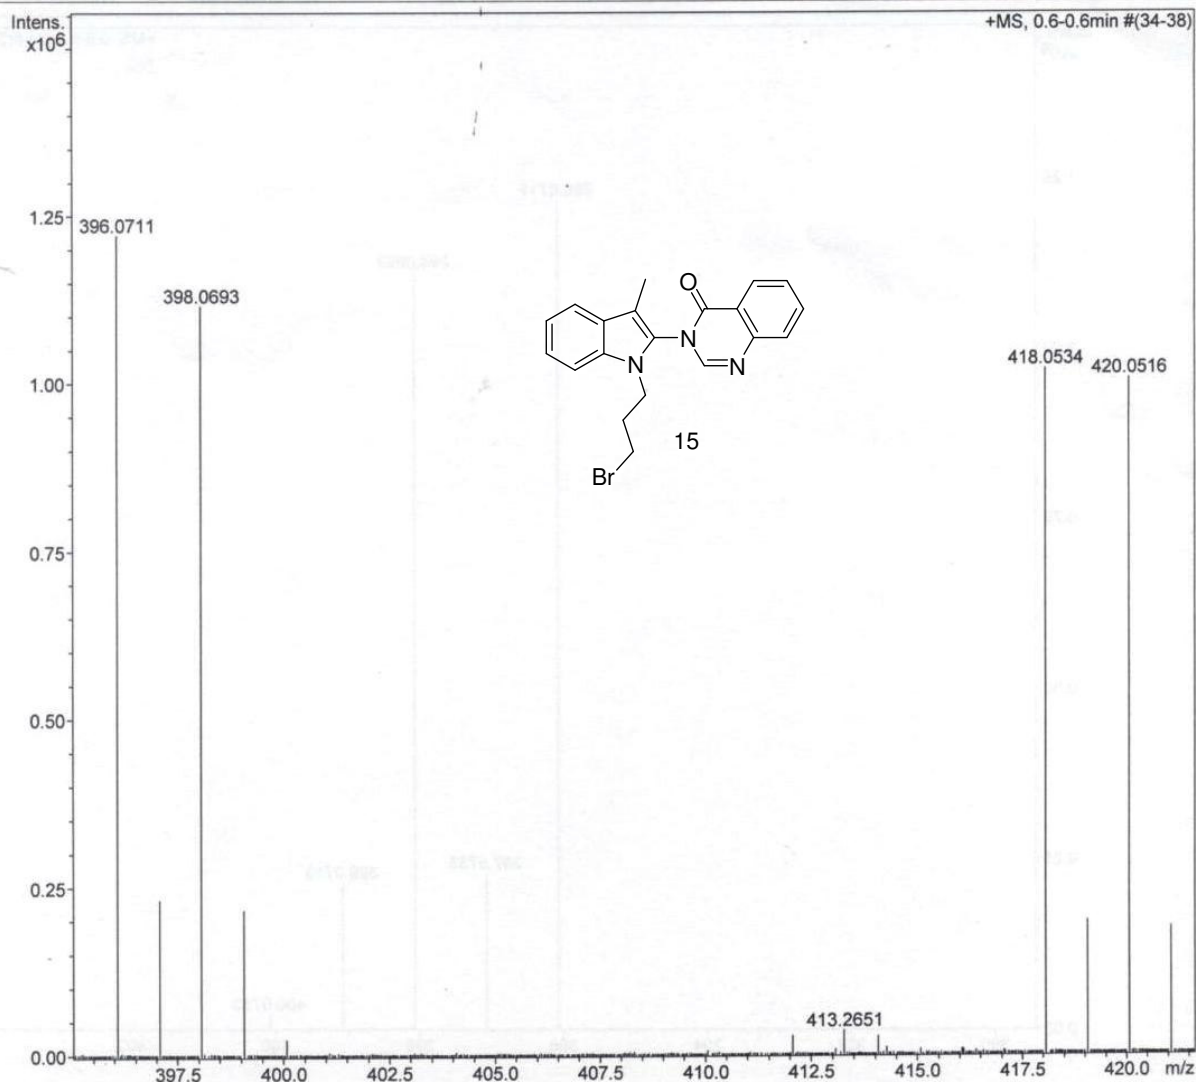

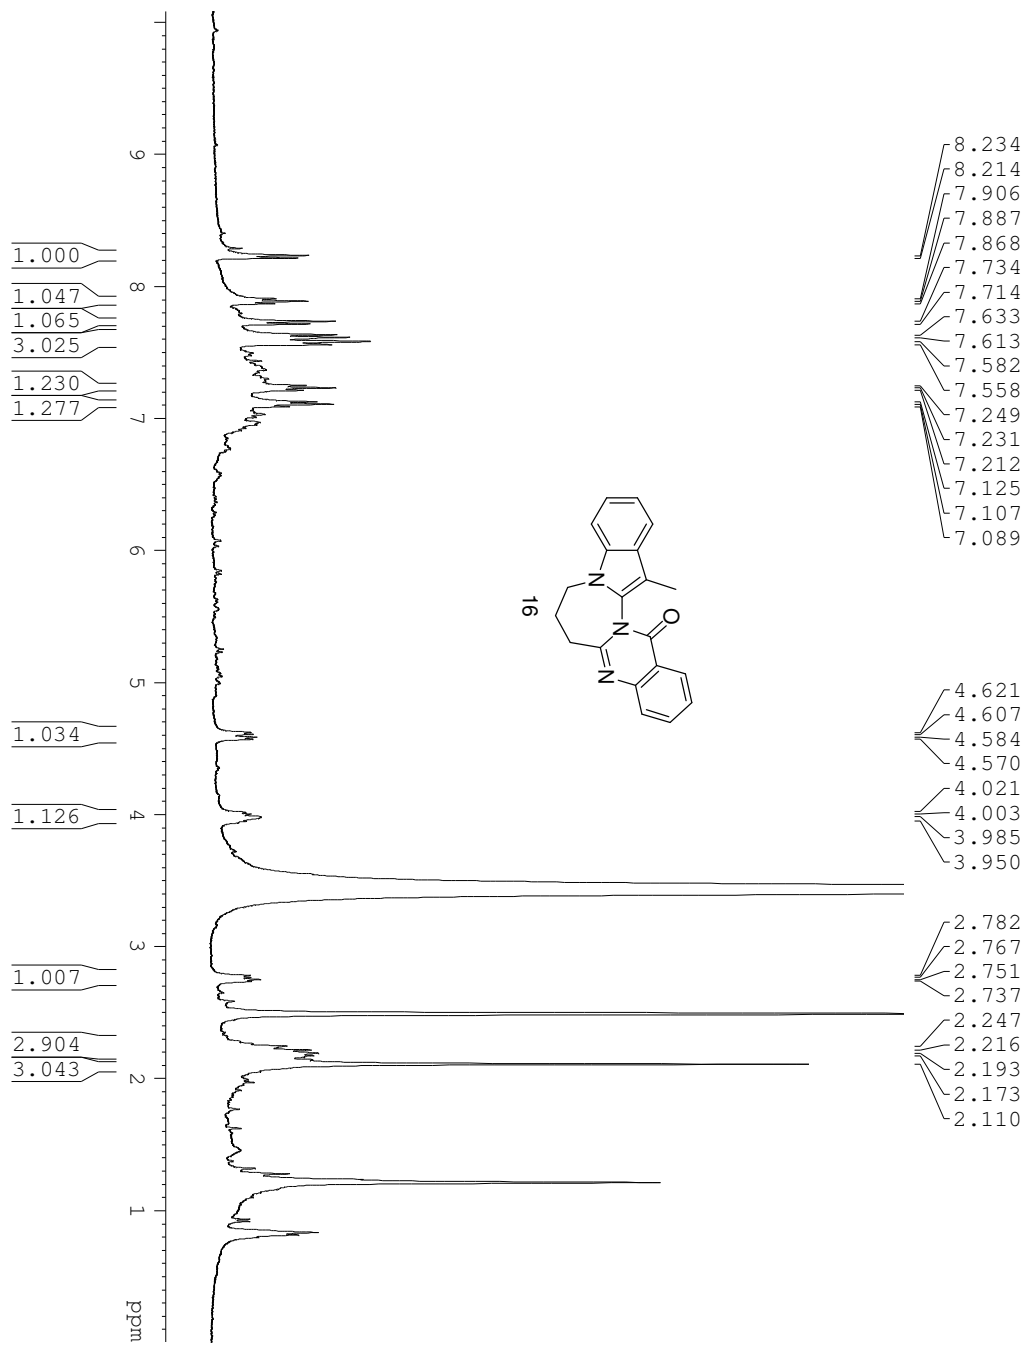

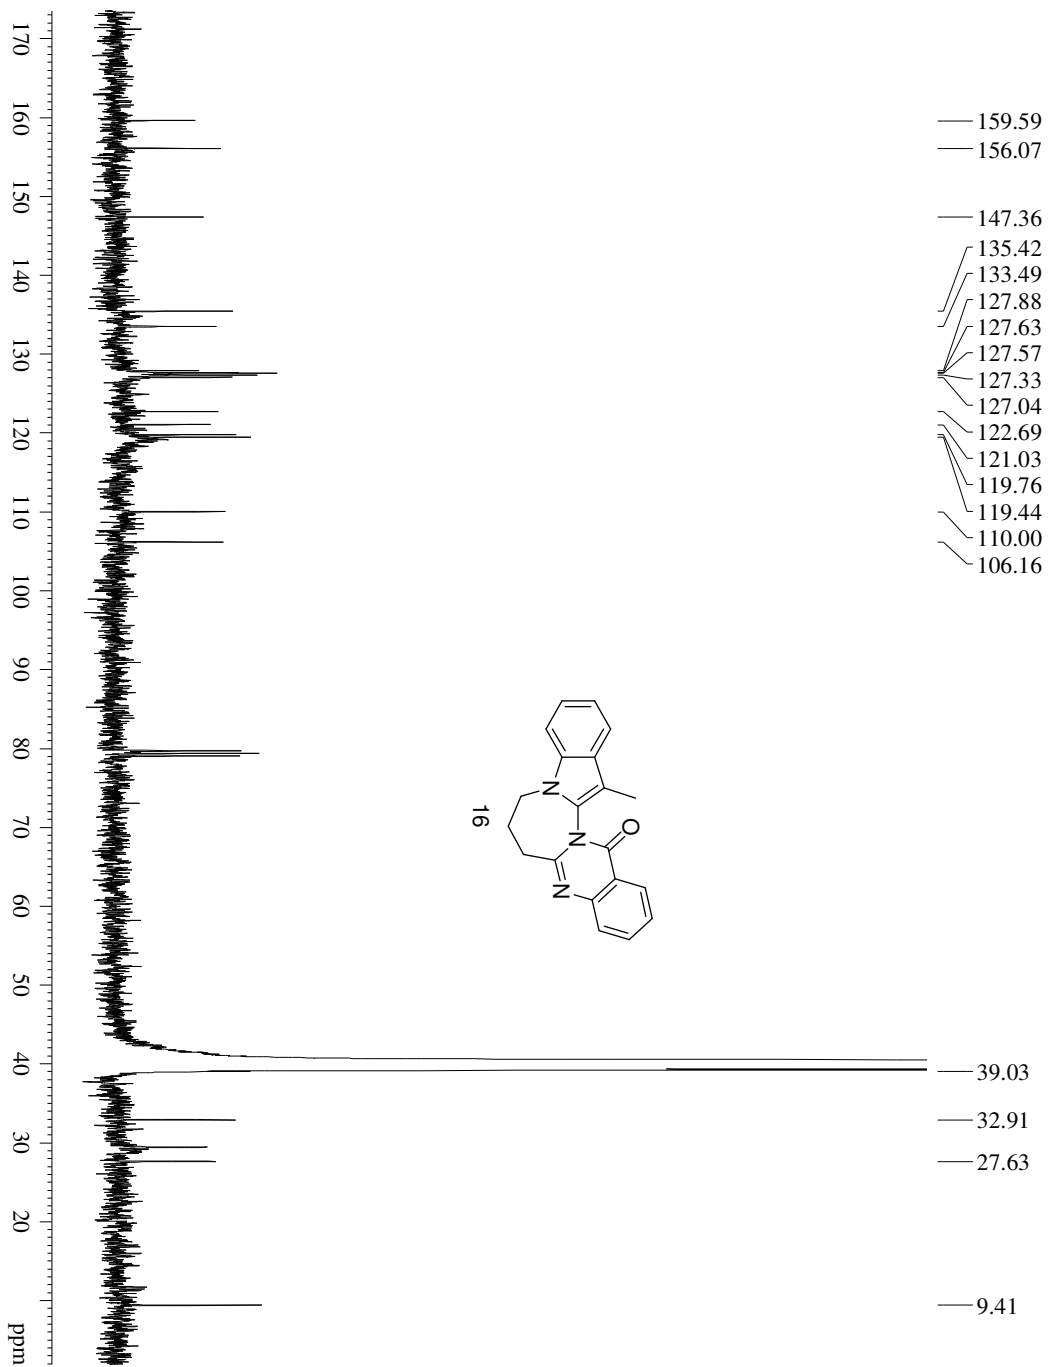



# BRUKER MAXIS HRMS REPORT

School of Chemistry  
University of Hyderabad

## Analysis Info

Analysis Name D:\Data\2013\Dr.NAGARAJAN\AUG\SKG-265.d  
Method tune\_low\_Pos.m  
Sample Name SKG-265-DCM-MEOH  
Comment

Acquisition Date 8/12/2013 12:50:19 PM

Operator Ramu Sridhar  
Instrument maXis 10138

## Acquisition Parameter

Source Type ESI  
Focus Not active  
Scan Begin 50 m/z  
Scan End 1500 m/z

Ion Polarity Positive  
Set Capillary 3800 V  
Set End Plate Offset -500 V  
Set Collision Cell RF 350.0 Vpp

Set Nebulizer 4.4 psi  
Set Dry Heater 180 °C  
Set Dry Gas 4.0 l/min  
Set Divert Valve Waste

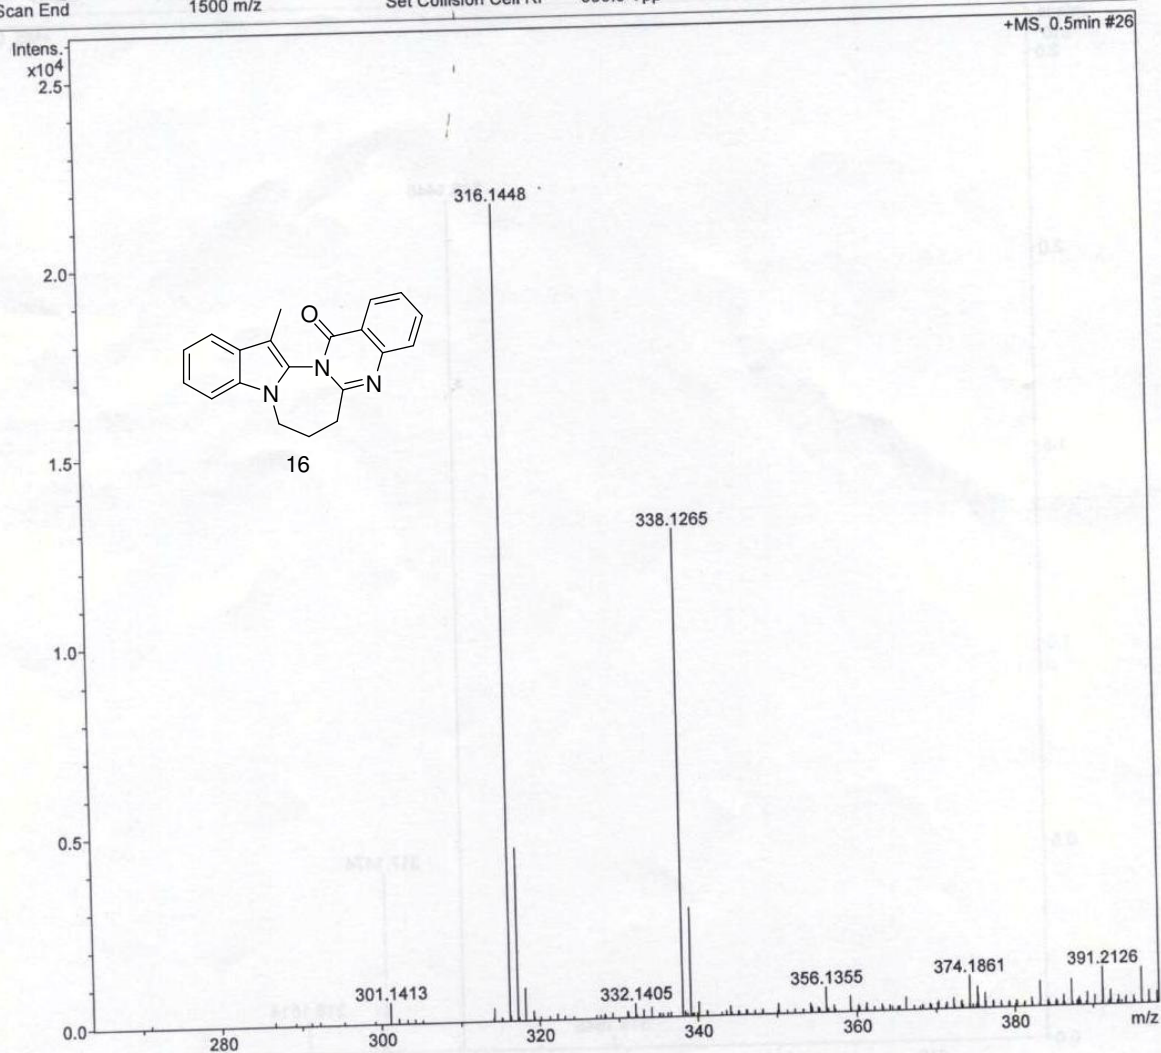

Supplement: c4ra02417f1.pdf [file c4ra02417f1.pdf]
